# Supplementary material for: PRAME-Induced Inhibition of Retinoic Acid Receptor Signaling-Mediated Differentiation—A Possible Target for ATRA Response in AML without t(15;17)
Source: Oxford University Press journal article supplement (doi:10.1158/1078-0432.ccr-11-2524), 2013-02-26
Supplement: 10780432ccr112524-sup-tab1.xlsx [file 10780432ccr112524-sup-tab1.xlsx]

## Sheet: Tabelle1
Supplementary Table 1
Study	ID	ArrayID	Gender	Age	ATRA	Rem_Doppel	Status	OS in days	PRAME	PRAME grouping	Karyotype	FLT3-ITD	NPM1
98B	207	shcz075	2	68.7858	1	RD	dead	80	-2.73774	1	CN-AML	0	1
98B	269	shcz079	2	68.5914	1	CR	dead	256	-2.45885	1	CN-AML	1	1
98B	81	shcz065	2	63.4798	0	ED	dead	12	-2.28886	1	complex karyotype	0	0
98B	33	shcz209	1	65.473	1	RD	dead	47	-2.06103	1	complex karyotype	0	0
98B	4	shcz208	1	62.9651	1	CR	dead	380	-1.97911	1	CN-AML	0	0
98B	258	shet135	1	61.8316	1	CR	dead	814	-1.84729	1	,t(9;11)	0	0
98B	369	shfa126	1	71.2498	1	CR	dead	123	-1.60962	1	inv(16)	0	0
98B	66	shcz062	2	73.4237	0	CR	dead	85	-1.4077	1	CN-AML	1	1
98B	321	shcz223	2	68.3176	0	CR	alive	2335	-1.11007	1	t(15;17)	1	0
98B	163	shdj082	1	63.0007	0	CR	dead	206	-1.06622	1	CN-AML	1	0
98B	234	shcz077	2	67.1677	1	RD	dead	684	-1.06334	1	CN-AML	0	0
98B	226	shdj087	2	74.0315	1	CR	dead	353	-0.978602	1	other	0	0
98B	7	shee067	1	68.1342	1	CR	alive	3211	-0.978511	1	CN-AML	0	1
98B	93	shdj074	1	66.6475	1	RD	dead	95	-0.972965	1	CN-AML	0	0
98B	284	shcz080	2	67.781	1	RD	dead	521	-0.965101	1	CN-AML	0	1
98B	98	shcz066	1	73.3498	0	ED	dead	25	-0.86322	1	complex karyotype	0	0
98B	492	shee220	2	68.3943	0	RD	dead	81	-0.848713	1	CN-AML	1	1
98B	290	shet169	2	66.7488	1	RD	dead	125	-0.843758	1	t(6;9)	1	0
98B	171	shcz074	2	62.2286	1	CR	alive	2709	-0.802071	1	CN-AML	0	1
98B	210	shcz076	1	63.4497	0	CR	dead	343	-0.754189	1	other	0	0
98B	230	shet121	2	84.4983	0	RD	dead	526	-0.723904	2	other	0	0
98B	404	shfs124	1	70.0972	0	RD	dead	415	-0.717297	2	CN-AML	1	0
98B	458	shfs122	1	63.9754	0	RD	dead	63	-0.668474	2	complex karyotype	0	0
98B	243	shdj089	1	73.0869	1	ED	dead	29	-0.639837	2	t(8;21)	0	1
98B	59	shdj072	1	62.6256	1	RD	dead	489	-0.604873	2	CN-AML	0	0
98B	462	shdj092	1	68.7228	1	RD	dead	513	-0.584106	2	other	0	0
98B	22	shet030	2	61.9192	0	ED	dead	49	-0.57909	2	t(15;17)	1	0
98B	346	shdj097	1	67.0308	1	CR	dead	546	-0.572683	2	other	0	1
98B	329	shfs114	1	65.0376	1	RD	dead	576	-0.52999	2	other	0	0
98B	317	shdj093	1	65.4018	1	RD	dead	300	-0.474917	2	complex karyotype	0	0
98B	279	shee084	2	60.3258	0	ED	dead	70	-0.402326	2	CN-AML	0	0
98B	3	shfs112	2	66.6639	1	RD	dead	511	-0.400242	2	other	0	0
98B	390	shee127	2	61.4648	1	RD	dead	434	-0.400123	2	other	0	0
98B	468	shdj065	2	63.488	1	CR	dead	151	-0.368593	2	CN-AML	1	1
98B	21	shee068	2	69.1636	1	CR	dead	737	-0.306085	2	CN-AML	1	0
98B	452	shdj107	2	63.5592	1	CR	dead	181	-0.279851	2	inv(16)	0	0
98B	470	shfs088	1	74.2341	1	ED	dead	35	-0.264125	2	CN-AML	0	0
98B	372	shdj100	2	61.1882	0	CR	dead	633	-0.254789	2	other	1	0
98B	337	shcz227	1	71.5866	0	ED	dead	32	-0.239287	2	CN-AML	1	1
98B	245	shee083	2	76.783	1	ED	dead	15	-0.230549	2	CN-AML	1	1
98B	135	shfs087	1	70.4257	1	CR	dead	483	-0.219261	3	CN-AML	0	0
98B	45	shfs123	2	68.4928	1	CR	dead	1091	-0.216261	3	inv(16)	0	0
98B	272	shfs101	1	73.2457	1	RD	dead	54	-0.214283	3	other	1	0
98B	23	shee069	2	62.371	0	CR	alive	3246	-0.204355	3	CN-AML	0	1
98B	365	shee126	2	69.9685	1	CR	dead	776	-0.174183	3	CN-AML	1	1
98B	206	shee082	2	63.2772	0	RD	dead	218	-0.0610645	3	CN-AML	1	1
98B	350	shfs131	1	74.7598	1	CR	dead	405	-0.0481887	3	CN-AML	0	0
98B	395	shee128	2	65.911	0	RD	dead	75	-0.0459399	3	other	0	0
98B	162	shdj081	1	69.1773	0	RD	dead	31	-0.0253669	3	CN-AML	1	0
98B	437	shee156	1	67.3238	0	ED	dead	29	-0.0017035	3	CN-AML	0	1
98B	411	shfs077	1	61.1663	0	RD	dead	70	0.0275396	3	other	0	0
98B	500	shee230	1	63.2225	0	RD	dead	83	0.029152	3	complex karyotype	0	0
98B	723	shfs081	1	61.5441	0	CR	dead	1083	0.0512107	3	other	0	0
98B	38	shfs111	1	68.0712	0	CR	dead	175	0.194572	3	inv(16)	NA	NA
98B	463	shet185	1	65.1088	0	RD	dead	35	0.197669	3	CN-AML	0	1
98B	454	shdj109	1	68.9418	0	RD	dead	237	0.217479	3	CN-AML	1	0
98B	416	shcz112	1	65.6427	0	CR	dead	305	0.224643	3	t(15;17)	0	0
98B	86	shee070	2	60.6105	1	CR	alive	2985	0.232844	3	CN-AML	0	1
98B	526	shfs048	2	65.0595	0	CR	dead	870	0.282352	3	inv(16)	0	0
98B	442	shee157	2	79.2745	0	RD	dead	192	0.361954	3	CN-AML	0	1
98B	559	shee158	1	70.8172	0	RD	dead	54	0.381242	4	CN-AML	0	1
98B	292	shee120	1	73.6044	0	ED	dead	22	0.446674	4	other	1	0
98B	405	shee149	1	69.065	1	RD	dead	518	0.487419	4	CN-AML	0	1
98B	335	shcz226	2	60.2875	0	CR	dead	339	0.522219	4	t(9;11)	0	0
98B	299	shfs080	2	64.4216	0	RD	dead	553	0.579252	4	complex karyotype	0	0
98B	351	shcz106	2	69.6153	0	RD	dead	475	0.602584	4	other	0	0
98B	326	shfs089	2	61.1225	0	CR	dead	1762	0.65011	4	inv(16)	0	0
98B	76	shcz063	1	68.8241	1	CR	dead	1239	0.848992	4	CN-AML	0	0
98B	348	shcz228	1	66.1328	1	CR	dead	536	0.908495	4	CN-AML	1	0
98B	379	shcz110	1	67.1759	0	CR	dead	2005	0.966095	4	inv(16)	0	0
98B	91	shcz105	2	61.4839	0	CR	dead	340	1.16757	4	other	0	0
98B	280	shee085	1	71.7426	1	RD	dead	109	1.17016	4	CN-AML	1	1
98B	179	shdj084	1	65.0486	0	CR	alive	2653	1.19096	4	t(9;11)	0	0
98B	400	shet170	1	66.7187	1	CR	dead	446	1.37052	4	other	1	0
98B	281	shee096	2	65.2895	1	CR	dead	305	1.41734	4	CN-AML	0	0
98B	27	shdj113	1	65.0185	0	RD	dead	144	1.53944	4	other	NA	NA
98B	108	shet120	2	70.987	0	RD	dead	112	2.42585	4	other	1	0
98B	80	shcz064	1	71.989	1	RD	dead	140	4.33023	4	t(8;21)	0	0
98B	126	shdj114	1	74.3874	0	ED	dead	24	4.60951	4	CN-AML	0	0
98B	476	shcz091	1	66.9213	0	CR	dead	345	5.16539	4	t(8;21)	0	0

## Sheet: Tabelle2
Studie	ID	PRAME	PRAME grouping	ATRA	AnsprechenZykl1	AnsprechenZykl2	Rem_Doppel	Status	stat	os	efsstat	ereignart	efs	rfsstat	rfs	cuminc	HB	platelet	wbc	LDH_	gender	KMBlasten	PBBlasten	Laboreingangsnummer	G-Banding	Beurteilung	MLL_	FLT3_ITD_	FLT3_TKD	CEBPA_	NPM1_	NRAS_	FAB-Klassifikation	TypeAML	Gingivahyperplasie	Lymphadenopathie	Extramedullär	MolScreening_vollständig	VPA	VPA_Zykl	ATRA_Zykl
98B	23	-0.204355	3	0	CR	CR	CR	alive	0	3246	0		3246	0	3214	0	7.7	32	7.22	216	2		69	98KM798	46,XX	CR nach 1. Induktionszyklus. 2 HLA-identische Geschwister; mini-allo vom Bruder. Anruf beim HA lebt 24.11.02 Brief aus HD da. 13.3.06. Arztbrief aus Heidelberg: Pat war zuletzt am 22.05.2007 ambulant (wd).	0	0	0	0	1		2	AML	0	1	0	0	0	0	0
98B	723	0.0512107	3	0	CR	CR	CR	dead	1	1083	1	Rezidiv	686	1	643	1	11.4	60	3.92	203	1	70	44	03KM881	45,XY,-7		0	0	0		0			sAML	0	0	0	0	0	0	0
98B	38	0.194572	3	0	CR		CR	dead	1	175	1	Tod in CR	175	1	132	2	9.1	26	1.9	244	1	70	22	98PB1096/98KM1097	46,XY,inv(16)(p13q22)	Therapieabbruch wg. bds Pilzpneumonie. Verstorben Tel Prof Fischer 15.2.99, in einem anderen KH weiterbehandelt							4	AML	0	0	0	0	0	0	0
98B	416	0.224643	3	0	CR		CR	dead	1	305	1	Rezidiv	297	1	259	1	9.1	35	19.8	300	1	51	69	01KM872	46,XY,t(15;17)(q22;q21)[1]/48,XY,+8,+8,t(15;17)(q22;q21)[5]		0	0	0		0		3	AML	0	0	0	0	0	0	0
98B	526	0.282352	3	0	PR	CR	CR	dead	1	870	1	Rezidiv	272	1	201	1	7.1	87	22.8	240	2	100	22	01KM2545	46,XX,inv(16)(p13q22)	Ohne Randomisation Anruf beim HA lebt 1.12.03 - Anruf bei HA: Suizid der Patientin am 7.3.04 keine Followup Pauschale, da selber Verlauf dokumentiert	0	0	0		0		4	tAML	0	0	0	0	0	0	0
98B	335	0.522219	4	0	RD	CR	CR	dead	1	339	1	RD nach Ind1	34	1	135	1	8.9	197	105.4	508	2	90	0	00KM1978	46,XX,t(9;11)(p22;q23)		0	0	0		0		5	tAML	1	0	0	0	0	0	0
98B	326	0.65011	4	0	PR	CR	CR	dead	1	1762	1	Rezidiv	798	1	706	1	11.5	61	4	235	2	44.5	19	00KM1810	46,XX,inv(16)(p13q22)	kein EV für IEpo, Random. rückgängig	0	0	0		0	0	2	AML	0	0	0	0	0	0	0
98B	379	0.966095	4	0	CR	CR	CR	dead	1	2005	1	Rezidiv	350	1	320	1	8.6	40	21.9	420	1	50	58	01KM265	46,XY,inv(16)(p13q22)	Fax von Frau Dr. Kornberger am 20.06.2007: der Pat. Verstarb am 28.07.2006 (wd).	0	0	0		0	0	2	AML	0	0	0	0	0	0	0
98B	91	1.16757	4	0	RD	CR	CR	dead	1	340	1	RD nach Ind1	34	1	181	1	8.8	204	1.2	332	2	73	42	99KM405, 99PB406	46,XX,del(7)(q22q34)[3]/46,XX[12]	4.3.00 Multiorganversagen bei Therapierefraktärem Rezidiv	0	0	0		0		2	AML	0	1		0	0	0	0
98B	179	1.19096	4	0	CR	CR	CR	alive	0	2653	1	Rezidiv	544	1	510	1	9.8	32	31.9	1336	1	100	78	00PB63; 00PB621	45,X,-Y,t(9;11)(p21;q23)[9]46,XY,-Y,+8,t(9;11)(p21;q23)[2]	allog. Transplantation FCIE am 2.8.00 2/02 Hirnmetastasen - wieder zurückgebildet, BB in Ordnung, Anruf 1.7.02 beim HA, Anruf 10.03.03 beim HA, AZ recht gut SF. Telefonat Dr. Herholz 21.12.05 AML in CR. Anruf bei der Ehefrau von Herrn Johann Pfaff (Tel.	0	0	0		0		5	AML	0	0	0	0	0	0	0
98B	476	5.16539	4	0	PR	CR	CR	dead	1	345	1	Rezidiv	270	1	239	1	7.8	28	27.2	470	1	81	74	01KM1838	45,X,-Y,t(8;21)(q22;q22),del(11)(q21q23)		0	0	0		0	0	2	AML	0	0	0	0	0	0	0
98B	437	-0.0017035	3	0	ED		ED	dead	1	29	1	Tod in Induktion	29				6.7	12	21.4	951	1	95	93	01KM1246	46,XY		0	0	1	0	1		1	AML	0	0	0	0	0	0	0
98B	292	0.446674	4	0	ED		ED	dead	1	22	1	Tod in Induktion	22				7.9	80	2.1	548	1	55	8	00KM1379	46,XY,del(5)(q13q33)[10]/47,XY,+8[3]/46,XY[11]	verstorben (Aspergilluspneumnoie)	0	1	0		0		5	AML	0	0	0	0	0	0	0
98B	126	4.60951	4	0	ED		ED	dead	1	24	1	Tod in Induktion	24				9.3	13	52.3	356	1	60	86	99KM1005, 99PB1006	46,XY		0	0	0	0	0		0	AML	0	0	0	0	0	0	0
98B	206	-0.0610645	3	0	CR	REZ	RD	dead	1	218	1	Rezidiv	140	1	40	1	8	75	41.5	599	2	59	54	00KM360,00PB361	46,XX	APL (M3)	0	1	0	0	1		4	AML	0	0	1	0	0	0	0
98B	395	-0.0459399	3	0	RD	RD	RD	dead	1	75	1	RD nach Ind1	34				8.2	300	1.6	173	2	80	69	01KM561	46,XX,del(5)(q13q33)[3]/46,XX,del(5)(q13q33),del(13)(q12q14)[6]/46,XX[1]		0	0	0		0		2	AML	0	0	0	0	0	0	0
98B	162	-0.0253669	3	0	RD		RD	dead	1	31	1	RD nach Ind1	20				10.2	19	64.6	3953	1	91	97	99KM1346	46,XY		0	1	0	0	0		4	AML	0	0	0	0	0	0	0
98B	411	0.0275396	3	0	RD		RD	dead	1	70	1	RD nach Ind1	38				8.8	29	110	1980	1	72	99	01PB819	47,XY,+13		0	0	0		0		2	AML	0	1	1	0	0	0	0
98B	500	0.029152	3	0	RD	RD	RD	dead	1	83	1	RD nach Ind1	36				8.6	21	6.7	957	1	33	28	01PB2243	46,XY,-2,-5,-7,-9,-18,add(19)(q13),add(21)(p11),+4mar,+r		0	0	0	0	0			AML	0	0		0	0	0	0
98B	463	0.197669	3	0	RD		RD	dead	1	35	1	RD nach Ind1	30				11	78	12.1	419	1	60	51	01KM1629	46,XY		0	0	0	0	1		5	AML	0	0	0	0	0	0	0
98B	454	0.217479	3	0	RD	RD	RD	dead	1	237	1	RD nach Ind1	17				9.6	101	69.7	648	1	70	36	01KM1498	46,XY	keine Weiterbehandlung nach Protokoll wg. persistierender Thrombopenie	0	1	0	0	0		2	AML	0	0	0	0	0	0	0
98B	442	0.361954	3	0	PR		RD	dead	1	192	0		192				10.7	98	68	1043	2	80	86	01KM1294	46,XX	Abbruch wegen Ileus-Symptomatik	0	0	0	0	1		4	AML	0	0	0	0	0	0	0
98B	559	0.381242	4	0	PR		RD	dead	1	54	0		54				9.4	38	10.8	210	1		78	01KM3107	46,XY		0	0		0	1		2	AML	0	0	0	0	0	0	0
98B	299	0.579252	4	0	RD	RD	RD	dead	1	553	1	RD nach Ind1	34				10.7	40	4.6		2	30		00KM1474	47,XX,del(3)(p25),del(5)(q13q33),+8,iso(22)(q10),+dmin[3]/47,XX,del(5)(q13q33),+8,iso(22)(q10),+dmin[14]/46,XX[1]		0	0			0		2	AML	0		0	0	0	0	0
98B	351	0.602584	4	0	RD	RD	RD	dead	1	475	1	RD nach Ind1	33				7.1	84	1.1	187	2	80	1	00KM2352	46,XX,del(7)(q22),del(8)(p21)[5]/46,XX[12]		0	0			0		2	AML	0	0	0	0	0	0	0
98B	27	1.53944	4	0	RD	RD	RD	dead	1	144	1	RD nach Ind1	36				10	45	30.9	971	1	55	44	98KM850	45,XY,-7	V.a. Pilzpneumonie während 1. Induktionszyklus. Persistenz der Leukämie nach A-HAE und FLAG-Ida. 12/98 verstorben.							2	AML	0	1	0	0	0	0	0
98B	108	2.42585	4	0	RD	RD	RD	dead	1	112	1	RD nach Ind1	26				9.1	58	93.4	645	2	91	86	99KM723, 99PB724	46,XX,del(16)(q12)		0	1	0		0		1	AML	0	0	0	0	0	0	0
98B	135	-0.219261	3	1	CR	CR	CR	dead	1	483	1	Rezidiv	302	1	274	1	7.5	39.6	3.12	572	1	25	16	99KM1110	46,XY		1	0	0	0	0			AML	0	0	0	0	0	0	3
98B	45	-0.216261	3	1	CR	CR	CR	dead	1	1091	1	Rezidiv	189	1	125	1	8.6	13	19	837	2	73	21	98KM1138, 98PB1139	46,XX,del(X)(q26),inv(16)(p13q22)	PR nach A-ICE I, CR nach A-ICE II.nach Rezidiv A-HAE/A-HAE 29,12,99 CR	0	0	0		0		4	AML	0		0	0	0	0	3
98B	365	-0.174183	3	1	PR	CR	CR	dead	1	776	1	Rezidiv	520	1	455	1	9.4	6	61.78	423	2	85	67	01PB85	46,XX	2. Rezidiv am 12.12.02 - Alexan	0	1	0	0	1		1	AML	0		0	0	0	0	3
98B	350	-0.0481887	3	1	CR	CR	CR	dead	1	405	1	Rezidiv	252	1	221	1	11.5	27	11.1	312	1	80	83	00KM2349	46,XY		0	0	0	1	0		4	oAML	1	0	0	0	0	0	3
98B	86	0.232844	3	1	PR	CR	CR	alive	0	2985	1	Rezidiv	2241	1	2161	1	11	151	72.3	563	2	100	29	99KM334	46,XX	Anruf beim HA lebt 28.11.03 Brief aus HD da. 13.3.06. Brief aus HD: Pat war zuletzt bis 18.05.2007 stationär (wd).	0	0	0	0	1		4	AML	1	1	0	0	0	0	3
98B	76	0.848992	4	1	PR	CR	CR	dead	1	1239	1	Rezidiv	766	1	604	1	13.6	123	91.1	734	1	70		99KM214, 99PB215	46,XY	Thrombopenie nach 4. Zyklus IE po - Stop, 10.1.02 P-Ambulanz Ulm	0	0	0		0		5	AML		1		0	0	0	3
98B	348	0.908495	4	1	CR	CR	CR	dead	1	536	1	Rezidiv	224	1	196	1	10	38	162	2347	1	80	44	00KM2313	46,XY		0	1	0	0	0		4	AML	0	0	0	0	0	0	3
98B	400	1.37052	4	1	PR	CR	CR	dead	1	446	1	Rezidiv	308	1	275	1	10.6	69	37.3	752	1	68	74	01KM632	46,XY,t(6;Y;21;8)(q13;q12;q22;q22)[8]/47,XY,idem,+8[3]	9/01-1/02 Therapiefrei	0	1	0		0		2	oAML	0	0	1	0	0	0	3
98B	281	1.41734	4	1	PR	CR	CR	dead	1	305	1	Rezidiv	246	1	200	1	6.9	123	42.9	771	2	100	100	00KM1214	46,XX		0	0	0	0	0		2	AML	1		0	0	0	0	3
98B	272	-0.214283	3	1	RD		RD	dead	1	54	1	RD nach Ind1	32				9.9	28	24.5		1	30	64	00KM1173	47,XY,+21[10]/46,XY[2]	28.7.2000 Sturz mit Nasenbeinesfraktur	0	1	0		0		4	sAML	0	0	0	0	0	0	1
98B	405	0.487419	4	1	PR	RD	RD	dead	1	518	1	RD oder PR nach Ind2	75	1	308	1	11.5	196	5	214	1	95	69	01KM732	46,XY	kein IE	0	0	0	0	1		1	AML	0	0	0	0	0	0	3
98B	280	1.17016	4	1	RD	RD	RD	dead	1	109	1	RD nach Ind1	29				11.4	32	303	1160	1	95	96	00PB1226	46,XY	intracerebrale Blutung	0	1	0	0	1		2	AML	0	0	0	0	0	0	1
98B	80	4.33023	4	1	RD		RD	dead	1	140	1	RD nach Ind1	61				9.9	35	5.83	330	1	60	24	99KM275, 99PB276	46,XX,t(8;21)(q22;q22)		0	0	0		0	0	2	AML	0	1	0	0	0	0	1
				ATRA	no ATRA
			CR	9	11
			RD	4	13
			ED	0	3

## Sheet: Tabelle3
Studie	ID	PRAME	PRAME grouping	ATRA	AnsprechenZykl1	AnsprechenZykl2	Rem_Doppel	Status	stat	os	efsstat	ereignart	efs	rfsstat	rfs	cuminc	HB	platelet	wbc	LDH_	gender	KMBlasten	PBBlasten	Laboreingangsnummer	G-Banding	Beurteilung	MLL_	FLT3_ITD_	FLT3_TKD	CEBPA_	NPM1_	NRAS_	FAB-Klassifikation	TypeAML	Gingivahyperplasie	Lymphadenopathie	Extramedullär	MolScreening_vollständig	VPA	VPA_Zykl	ATRA_Zykl
98B	66	-1.4077	1	0	CR		CR	dead	1	85	1	Rezidiv	84	1	56	1	12.4	68	81	494	2	80	87	99KM58, 99PB59	46,XX	CR nach 1. Zyklus ICE. Rez. am 06.04.99; keine weitere Rx; Tod am 07.04.99. Warum kein ICEII ->siehe Arztbrief	0	1	0	0	1		4	tAML	0	1	0	0	0	0	0
98B	321	-1.11007	1	0	CR		CR	alive	0	2335	0		2335	0	2306	0	8.3	10	0.5	190	2	70		00KM1738	46,XX,t(15;17)(q22;q21)	Promyelozytenleukämie. Anruf bei Frau Martin am 17.04.2007: die Patientin war am 23.02.2007 in der Nuklearmedizin	0	1	0		0		3	AML	0	0	0	0	0	0	0
98B	163	-1.06622	1	0	CR	CR	CR	dead	1	206	1	Rezidiv	163	1	101	1	9.7	54	54	832	1	80	74	99KM1374	46,XY	Pat in Aplasie nach 2.Zyklus ATA verstorben, V.a. Aspergillus-Pneumonie in Aplasie	0	1	0	1	0		4	AML	0	0	0	0	0	0	0
98B	210	-0.754189	1	0	PR	CR	CR	dead	1	343	1	Rezidiv	202	1	113	1	7.4	152	29.9	343	1	81	73	00KM402	46,XY,add(7)(q11)[8]/46,XY,add(7)(q11),t(8;14)(q12;q23)[3]		1	0			0		4	AML	0	1	0	0	0	0	0
98B	372	-0.254789	2	0	CR	CR	CR	dead	1	633	1	Rezidiv	330	1	304	1	9.4	143	103	512	2		97		47,XX,+11[25]/46,XX[2]		1	1	0		0		1	AML	0	1	0	0	0	0	0
98B	81	-2.28886	1	0	ED		ED	dead	1	12	1	Tod in Induktion	12				7.2	44	116	750	2		66	99PB300	45,XX,der(5)t(5;7;15)(q31;?;q1?),del(7)(q11),-15		0	0	0		0			sAML	0	0	0	0	0	0	0
98B	98	-0.86322	1	0	ED		ED	dead	1	25	1	Tod in Induktion	25				11.3	66	1.95	693	1	70		99PB569	51,XY,+1,-5,+11,+11,+18,+18,+22	Am 06.06.99 verstorben (Pneumonie, respirator. Insuffizienz). kein ATRA	0	0	0		0			AML	0	0	0	0	0	0	0
98B	22	-0.57909	2	0	ED		ED	dead	1	49	1	Tod in Induktion	49				9.7	12	0.67	240	2	33		98KM795	46,XX,t(15;17)(q22;q21)	Z.n. Mammakarzinom; brusterhaltende Operation, Bestrahlung u. Rx mit Tamoxifen. Während AIDA ATRA-Syndrom, respiratorische Insuffizienz, ARF; Tod im Multiorganversagen.	0	1	0		0		3	oAML	0	0	0	0	0	0	0
98B	279	-0.402326	2	0	CR	ED	ED	dead	1	70	1	Tod in Induktion	70	1	38	2	10.6	55	25.2	358	2	80	80	00KM1216	46,XX		0	0	0	0	0		1	AML	0	0	0	0	0	0	0
98B	337	-0.239287	2	0	ED		ED	dead	1	32	1	Tod in Induktion	32				9.9	217	61.1	872	1	70	80	00KM2178	46,XY		0	1	0	0	1		1	oAML	0	0	0	0	0	0	0
98B	492	-0.848713	1	0	RD		RD	dead	1	81	1	RD nach Ind1	31				9.7	282	60.4	539	2		52	01PB2096	46,XX		0	1	0	0	1			AML	0	0	0	0	0	0	0
98B	230	-0.723904	2	0	RD	RD	RD	dead	1	526	1	RD nach Ind1	44				9.4	13	1.1	198	2	52	0	00KM958	46,XX,t(6;16)(q23;q22)[10]/46,XX[5]	verstorben an Pneumonie	0	0	0		0		1	AML	0	0	0	0	0	0	0
98B	404	-0.717297	2	0	RD		RD	dead	1	415	1	RD nach Ind1	29	1	35	1	7.7	77	35.14	322	1	75	52	01KM718	46,XY	alpha CD33 Studie	0	1	0	0	0		1	AML	0	1	1	0	0	0	0
98B	458	-0.668474	2	0	RD		RD	dead	1	63	1	RD nach Ind1	24				10	220	10.7	441	1	70	66	01KM1550	52-54,XY,+5,del(5)(q21q33)x2,del(6)(q13q15),+8,+10,+10,+11,+13,+14,der(16)t(16;?17)(q22~23;q23~24),-17,+21,+22,+mar[21]		0	0	0		0		1	AML	0	0	0	0	0	0	0
98B	269	-2.45885	1	1	CR		CR	dead	1	256	1	Rezidiv	237	1	204	1	10.7	53	190.4	720	2	100	100	00KM1101	46,XX	M3; kein 2. Zykl. A-ICE2 Einleitung des ersten Zykl. IE po	0	1	0	0	1		3	AML	1	0	0	0	0	0	2
98B	4	-1.97911	1	1	PR	CR	CR	dead	1	380	1	Rezidiv	294	1	265	1	7	28	69	605	1	95	73	98KM459	46,XY	Am 10.10.98 noch 10% unreife Zellen im KM. IEp.o. seit 18.10.98; regelmäßige ambulante Kontrollen.	1	0	0	0	0		1	AML	0	0	0	0	0	0	3
98B	258	-1.84729	1	1	CR		CR	dead	1	814	1	Rezidiv	759	1	730	1	7.5	42	15.6	546	1	95	62	00KM988	47,XY,+8,t(9;11)(p13;q23)[8]/46,XY,t(9;11)(p13;q23)[5]	Abbruch nach 1. Zyklus, wg. Aspergilluspneumonie Weiterbehandlung nach GAI-Protokoll	0	0			0		5	AML	0	0	0	0	0	0	1
98B	369	-1.60962	1	1	PR	CR	CR	dead	1	123	1	Tod in CR	123	1	45	2	9	112	11.4	248	1	40		01KM129	46,XY,inv(16)(p13q22)	Sepsis mit Multiorganversagen im Nadir nach A-HAM	0	0	0		0	1	4	AML	0	0	0	0	0	0	3
98B	226	-0.978602	1	1	CR	CR	CR	dead	1	353	1	Rezidiv	272	1	236	1	10.8	111	21.2	871	2	91	43	00KM559,00PB560	47,XX,del(5)(q13q33),+6[13]/46,XX,del(5)(q13q33)[5]	AML M 3 wurde nicht bestätigt, sondern M2, AIDA läuft aber weiter		0	0		0		3	oAML	0	0	0	0	0	0	2
98B	7	-0.978511	1	1	PR	CR	CR	alive	0	3211	0		3211	0	3127	0	7.2	47	17.7	323	1	86	69	98KM588	46,XY	Nach 1. Zyklus A-ICE 40 Tage Aplasie; 2. Zyklus in 75%-iger Dosis. CR nach 2. Zyklus A-ICE. Hat HLA-identische Brüder. Vortstellung bei uns. Für Mini-allo nicht geeignet. Lt. HA weiter in CR. 2.3.06. Anruf bei Dr. Rendenbach, Tel: 0651/49393, am 19.04.200	0	0	0	1	1		4	AML	0	0	0	0	0	0	3
98B	171	-0.802071	1	1	RD	CR	CR	alive	0	2709	1	RD nach Ind1	51	0	2601	0	9.6	41	61.68	361	2	80	81	99KM1446	46,XX	lt. HA weiter in CR. 1.3.06. Fax aus München am 19.07.2007 angekommen: die Patientin war zuletzt am 15.05.2007 da (wd)	0	0	0	0	1		4	AML	1	1	0	0	0	0	3
98B	346	-0.572683	2	1	CR	CR	CR	dead	1	546	1	Rezidiv	288	1	235	1	8.9	49	37.9	252	1	80	96	00PB2307	46,XY,inv(9)(p12q12)c			0	0		1		1	AML	0	1	0	0	0	0	3
98B	468	-0.368593	2	1	PR	CR	CR	dead	1	151	1	Tod in CR	151	1	56	2	11.2	65	179.7	551	2	90	91	01KM1663	46,XX		0	1	0	0	1		1	AML	0	1	0	0	0	0	2
98B	21	-0.306085	2	1	CR	CR	CR	dead	1	737	1	Tod in CR	737	1	705	2	11.5	165	1.46	165	2	90	21	98KM785, 98PB786	46,XX	Pilzpneumonie nach mini-allo.	0	1	0	0	0			AML	0	0	0	0	0	0	3
98B	452	-0.279851	2	1	RD	CR	CR	dead	1	181	1	RD nach Ind1	33	1	78	1	9.1	8	25.3	301	2	60	63	01KM1454	46,XX,inv(16)(p13q22)		0	0	0		0	0	4	tAML	0	1	0	0	0	0	1
98B	243	-0.639837	2	1	ED		ED	dead	1	29	1	Tod in Induktion	29				9	39	57.5	276	1	90	57	00KM787	46,XY,t(8;21)(q13;q22)	Tag1 20.5.00; Subdurales Hämatom rechts und SAB links nach Sturz auf den Hinterkopf am 10.6.	0	0	0		1	0		AML	0	0	0	0	0	0	1
98B	470	-0.264125	2	1	ED		ED	dead	1	35	1	Tod in Induktion	35				11.2	28	0.7	173	1	70	0	01KM1779	46,XY	KM Punctio sicca	0	0	0	0	0		1	AML	0	0	0	0	0	0	1
98B	245	-0.230549	2	1	ED		ED	dead	1	15	1	Tod in Induktion	15				11	20	149	550	2	90	95	00PB782	46,XX		0	1	0	0	1		1	AML	0	0	0	0	0	0	1
98B	207	-2.73774	1	1	PR	RD	RD	dead	1	80	1	RD oder PR nach Ind2	76				8.5	37	157.5	364	2	90	96	00KM339	46,XX	Vorphase mit ARA C, verschiedene Begleiterkrankungen	0	0	0	0	1		5	AML			0	0	0	0	2
98B	33	-2.06103	1	1	RD		RD	dead	1	47	1	RD nach Ind1	34				5.6	135	9.1	547	1	95	76	98KM912, 98PB913	45-46,XY,add(2)(p13),-5,del(7)(q22),add(9)(p13),-13,-15,-19,-20,+4-5mar	Kein Ansprechen auf A-ICE. Wegen Pilzpneumonie und stark reduziertem AZ keine weitere Rx. Tod am 12.09.98 (persistiernde Panzytopenie).	0	0	0		0		4	sAML	0	0	0	0	0	0	1
98B	234	-1.06334	1	1	RD	RD	RD	dead	1	684	1	RD nach Ind1	405				7.7	39	31.7	202	2		91	00KM670, 00PB671	46,XX		0	0	0	0	0			sAML	0	1	0	0	0	0	1
98B	93	-0.972965	1	1	PR	RD	RD	dead	1	95	1	RD oder PR nach Ind2	89				6	95	56.3	808	1	85	16	99KM480, 99PB481	46,XY	Rezidivdoku	0	0	0	0	0		4	AML	0		0	0	0	0	2
98B	284	-0.965101	1	1	RD	PR	RD	dead	1	521	1	RD nach Ind1	42	1		1	9.9	115	52.1	280	2	65	79	00KM1283	46,XX		0	0	0	0	1		4	AML	0	0	0	0	0	0	1
98B	290	-0.843758	1	1	RD		RD	dead	1	125	1	RD nach Ind1	32				9	68	10.6	318	2	90	38	00KM1364	46,XX,t(6;9)(p23;q34)[21]/45,XX,t(6;9)(p23;q34),-21[3]	Angina pectoris, keine weitere Chemother., WV DRK 11,10,00	0	1	0		0		1	AML	0	0	0	0	0	0	1
98B	59	-0.604873	2	1	RD	RD	RD	dead	1	489	1	RD nach Ind1	31				11.8	22	112	724	1	90	66	98PB1521	46,XY	Mini Allo mit Bu Flud. In Idar-Oberstein	0	0	0	1	0		2	AML	0	1	0	0	0	0	1
98B	462	-0.584106	2	1	RD	RD	RD	dead	1	513	1	RD nach Ind1	27				7.7	93	78		1	70	65	01KM1627	47,XY,+21[3]/48,XY,+21,+21[2]/46,XY[5]	Pat bereits gemeldet ID343		0	0		0		2	sAML			0	0	0	0	1
98B	329	-0.52999	2	1	RD	RD	RD	dead	1	576	1	RD nach Ind1	33				10	16	3.9	209	1	60	36	00KM1891	46,XY,t(6;21)(q23;q22)	V.a. Aspergillus Pneumonie	0	0	0		0		1	AML	0	0	0	0	0	0	2
98B	317	-0.474917	2	1	RD	RD	RD	dead	1	300	1	RD nach Ind1	31	1	189	1	9.4	66	33.4	932	1	75	69	00KM1689	45,X,-Y,add(12)(p13),del(16)(p11),add(17)(q23),add(22)(q13)[9]/46,XY,add(12)(p13),del(16)(p11),add(17)(q23),add(22)(q13)[7]/48,XY,+6,+8,add(12)(p13),del(16)(p11),add(17)(q23),add(22)(q13)[3]	1.Zyklus Flag-Ida 3.11.-7.11. - CR, 2.Zyklus Flag-Ida 28.12-1.1.01 CR, seitdem CR	0	0	0		0		5	AML	0	0	1	0	0	0	1
98B	3	-0.400242	2	1	RD	RD	RD	dead	1	511	1	RD nach Ind1	17				7.1	164	5.17	175	2	50	22	98KM330	46,XX,add(6)(p2?3),del(9)(p13)	Fortsetzung von IEp.o. in Heilbronn (Dr. Konicek).	0	0	0		0		1	AML	0	0	0	0	0	0	1
98B	390	-0.400123	2	1	RD	RD	RD	dead	1	434	1	RD nach Ind1	40				7.5	330	30	639	2	80	61	01KM470	45,XX,-7[]/46,XX,-7,+mar[]/46,XX[2]		0	0	0		0			AML	0	1	0	0	0	0	1
				ATRA	no ATRA
			CR	11	5
			RD	12	4
			ED	3	5
