# Supplementary material for: PRAME-Induced Inhibition of Retinoic Acid Receptor Signaling-Mediated Differentiation—A Possible Target for ATRA Response in AML without t(15;17)
Source: Oxford University Press journal article supplement (doi:10.1158/1078-0432.ccr-11-2524), 2013-02-26
Supplement: 10780432ccr112524-sup-tab2.xlsx [file 10780432ccr112524-sup-tab2.xlsx]

## Sheet: ClassComparison PRAME 05
Supplementary Table 2
	Parametric p-value	FDR	Geom mean of ratios in PRAME high	Geom mean of ratios in PRAME low	Fold-change	Unique id	Gene symbol
1	< 1e-07	< 1e-07	4.66556	0.337198	13.8363	IMAGE:897956	PRAME
2	5.7e-06	0.016804	0.603683	1.80859	0.333786	IMAGE:825620	Data not found
3	6e-06	0.016804	1.99309	0.568286	3.50719	IMAGE:452374	ORM2
4	1.9e-05	0.0399095	2.02616	0.64507	3.14099	IMAGE:346696	TEAD4
5	0.000136	0.14605	0.648346	1.71725	0.377548	IMAGE:195801	Data not found
6	0.0001641	0.14605	1.54527	0.570558	2.70835	IMAGE:2063390	AMBP
7	0.0002212	0.14605	1.49872	0.622325	2.40825	IMAGE:77915	PLA2G2A
8	0.000226	0.14605	0.695245	1.70421	0.407957	IMAGE:1559108	Data not found
9	0.0002405	0.14605	0.625884	1.62816	0.384412	IMAGE:276782
10	0.0002439	0.14605	1.46949	0.601349	2.44365	IMAGE:200263	APOA1
11	0.0002633	0.14605	0.593499	1.65621	0.358348	IMAGE:129721
12	0.0002836	0.14605	0.50591	1.81465	0.278792	IMAGE:128598
13	0.0002896	0.14605	2.36858	0.481952	4.91456	IMAGE:796266	PSD3
14	0.0003117	0.14605	1.68498	0.627168	2.68664	IMAGE:1909457	PRSS23
15	0.0003119	0.14605	1.52409	0.645806	2.35999	IMAGE:754106	In multiple ClusterIDs
16	0.0003533	0.14605	1.62532	0.659444	2.46468	IMAGE:841664	CAV1
17	0.0003555	0.14605	1.66756	0.579086	2.87963	IMAGE:2276858	MAGEA11
18	0.0003622	0.14605	0.593974	1.71485	0.34637	IMAGE:251407
19	0.0003824	0.14605	1.60427	0.653175	2.45611	IMAGE:2452256	FARP1
20	0.0003915	0.14605	1.65364	0.531312	3.11238	IMAGE:1076422	MUC13
21	0.0004014	0.14605	0.63092	1.87828	0.335904	IMAGE:209264	Data not found
22	0.0004327	0.14605	1.82048	0.508505	3.58007	IMAGE:140197	NRN1
23	0.0004468	0.14605	1.85352	0.729566	2.54058	IMAGE:31251	In multiple ClusterIDs
24	0.0005208	0.14605	1.47289	0.604548	2.43634	IMAGE:1700429	GFRA1
25	0.0005251	0.14605	1.4668	0.744209	1.97095	IMAGE:261971	CHMP1A
26	0.0005477	0.14605	1.34508	0.546688	2.46042	IMAGE:489129	FBN1
27	0.0005523	0.14605	1.45938	0.792942	1.84046	IMAGE:813693
28	0.0005673	0.14605	1.32107	0.613987	2.15163	IMAGE:449436	Data not found
29	0.0006046	0.14605	1.46715	0.649985	2.25721	IMAGE:703633	PSRC1
30	0.0006321	0.14605	0.619692	1.66845	0.371418	IMAGE:285406	Data not found
31	0.0006619	0.14605	1.38755	0.535057	2.59327	IMAGE:308989	RAB25
32	0.0006727	0.14605	0.689475	2.1051	0.327527	IMAGE:1941865
33	0.0006777	0.14605	1.29291	0.499544	2.58818	IMAGE:704459	In multiple ClusterIDs
34	0.0007193	0.14605	1.73687	0.610826	2.84348	IMAGE:810728	DMKN
35	0.0007499	0.14605	0.676258	1.85267	0.365019	IMAGE:1740459
36	0.0007567	0.14605	1.47884	0.639536	2.31237	IMAGE:813841	PLAT
37	0.0007956	0.14605	0.720536	1.80181	0.399895	IMAGE:66753	Data not found
38	0.0008227	0.14605	1.44775	0.689353	2.10017	IMAGE:782730	ALDH1A2
39	0.0008293	0.14605	0.726831	1.40202	0.518418	IMAGE:435449
40	0.0008372	0.14605	1.59913	0.744774	2.14714	IMAGE:724652	CD8B
41	0.0008423	0.14605	1.50834	0.662447	2.27692	IMAGE:32609	Data not found
42	0.0008431	0.14605	1.58616	0.543386	2.91903	IMAGE:1568391	PLS3
43	0.0008472	0.14605	1.44771	0.681755	2.1235	IMAGE:795833	In multiple ClusterIDs
44	0.0008479	0.14605	1.85851	0.561674	3.30887	IMAGE:810131	KRT19
45	0.0008513	0.14605	1.27559	0.691731	1.84405	IMAGE:704532	NMI
46	0.0008523	0.14605	0.554211	1.35542	0.408887	IMAGE:471859	MEF2D
47	0.0008585	0.14605	0.629108	1.78517	0.352408	IMAGE:127665	Data not found
48	0.0008659	0.14605	0.54327	1.55301	0.349818	IMAGE:1592260	ST3GAL4
49	0.0008872	0.14605	0.608548	1.83548	0.331547	IMAGE:897791
50	0.0008878	0.14605	1.98815	0.692529	2.87086	IMAGE:812961	SIPA1L2
51	0.0009323	0.14605	1.44999	0.672272	2.15684	IMAGE:80484	NUPR1
52	0.0009554	0.14605	1.68742	0.616213	2.73838	IMAGE:2511237	FBLN2
53	0.0009699	0.14605	1.42343	0.736513	1.93267	IMAGE:109316	In multiple ClusterIDs
54	0.0009845	0.14605	0.840899	1.67114	0.50319	IMAGE:134398	Data not found
55	0.0009905	0.14605	0.492825	2.41504	0.204065	IMAGE:121218	PF4
56	0.0009923	0.14605	1.33574	0.606816	2.20122	IMAGE:809838	HSPA2
57	0.0009933	0.14605	0.650459	1.52541	0.426414	IMAGE:448162
58	0.0010082	0.14605	1.45166	0.6738	2.15443	IMAGE:2516430	LOC100289405
59	0.0010607	0.14707	0.568915	1.47652	0.385308	IMAGE:502096	EIF4E3
60	0.0011082	0.14707	1.27218	0.621539	2.04682	IMAGE:486110
61	0.0011145	0.14707	1.8151	0.675546	2.68686	IMAGE:731240	PSD3
62	0.0011337	0.14707	1.57325	0.633502	2.48341	IMAGE:882506	LOXL2
63	0.0011408	0.14707	1.61636	0.586883	2.75414	IMAGE:241530	EPHA2
64	0.0011524	0.14707	0.623706	1.58561	0.393354	IMAGE:432072	NFATC1
65	0.0012199	0.14707	1.31909	0.765181	1.72389	IMAGE:79960	In multiple ClusterIDs
66	0.0012353	0.14707	1.47927	0.756301	1.95593	IMAGE:76049	SLC2A8
67	0.0012443	0.14707	1.43708	0.632044	2.2737	IMAGE:898051	TNC
68	0.0012456	0.14707	1.53673	0.634727	2.42109	IMAGE:240961	DSP
69	0.0012506	0.14707	1.58556	0.770706	2.05728	IMAGE:1641451	GFRA1
70	0.0012552	0.14707	1.44204	0.65969	2.18594	IMAGE:138991	COL6A3
71	0.0012561	0.14707	1.63747	0.757537	2.16157	IMAGE:592777	FER1L4
72	0.0012603	0.14707	1.32178	0.698807	1.89148	IMAGE:79525	UBL3
73	0.0013013	0.149774	1.38652	0.628181	2.20719	IMAGE:68265	AFP
74	0.0013411	0.152269	1.35702	0.703498	1.92897	IMAGE:212429	TF
75	0.0013744	0.15397	1.48757	0.730777	2.03561	IMAGE:1527297	RAB3IP
76	0.0014124	0.156144	0.691586	1.37382	0.503402	IMAGE:588328	Data not found
77	0.0014633	0.157359	1.74893	0.598066	2.9243	IMAGE:824873	RDH13
78	0.001467	0.157359	2.24893	0.636754	3.53187	IMAGE:121722	FBN2
79	0.0014931	0.157359	1.66065	0.618669	2.68424	IMAGE:2019469	CKMT1B
80	0.0014983	0.157359	1.54862	0.655061	2.36408	IMAGE:610006	In multiple ClusterIDs
81	0.0015642	0.162252	0.590156	1.67292	0.35277	IMAGE:786302	DPEP2
82	0.0016421	0.164614	1.61644	0.652995	2.47543	IMAGE:784772	AKAP12
83	0.0016441	0.164614	1.37471	0.664096	2.07005	IMAGE:360254	CYR61
84	0.0016473	0.164614	1.35571	0.628946	2.15553	IMAGE:785933	SRPX
85	0.0016737	0.164614	1.66174	0.655392	2.53549	IMAGE:626544	MYO10
86	0.0017306	0.164614	0.717007	1.46211	0.490391	IMAGE:416294
87	0.0017389	0.164614	1.29051	0.738693	1.74701	IMAGE:378488	CYR61
88	0.0017407	0.164614	1.28404	0.678835	1.89153	IMAGE:769686	In multiple ClusterIDs
89	0.0017519	0.164614	1.87517	0.754691	2.48469	IMAGE:505904	NEURL
90	0.0017633	0.164614	1.50451	0.617213	2.43759	IMAGE:1470278	NES
91	0.0018066	0.166565	1.24264	0.56521	2.19854	IMAGE:1509904	PTGS2
92	0.0018574	0.166565	0.527903	1.27426	0.414282	IMAGE:2516692	CTSW
93	0.0018599	0.166565	0.660851	1.61451	0.40932	IMAGE:196370
94	0.0018977	0.166565	1.3368	0.678962	1.96889	IMAGE:195903	AHSG
95	0.0019152	0.166565	0.697443	1.47387	0.473205	IMAGE:240008
96	0.0019378	0.166565	0.476732	1.53633	0.310306	IMAGE:450427	Data not found
97	0.0019399	0.166565	1.44784	0.600694	2.41028	IMAGE:25049	ZNF302
98	0.0019428	0.166565	1.66035	0.514455	3.22739	IMAGE:1475476	MAGEA4
99	0.0020194	0.166624	1.48317	0.695571	2.13231	IMAGE:826137
100	0.0020295	0.166624	1.59712	0.576996	2.76799	IMAGE:277480	B4GALNT4
101	0.0020434	0.166624	0.644721	1.25546	0.513534	IMAGE:193476	Data not found
102	0.0020599	0.166624	1.33896	0.626525	2.13712	IMAGE:1607286	CYR61
103	0.0021805	0.166624	0.471825	1.34333	0.351235	IMAGE:66507	EMR1
104	0.0022162	0.166624	1.54002	0.695051	2.21569	IMAGE:753428	CTHRC1
105	0.0022272	0.166624	1.39868	0.67582	2.06961	IMAGE:23185	TNC
106	0.002243	0.166624	2.13114	0.65445	3.25639	IMAGE:384819	TEAD1
107	0.0022436	0.166624	1.35829	0.5845	2.32385	IMAGE:2504927	TFF1
108	0.0022536	0.166624	0.615252	1.39484	0.441091	IMAGE:1470551
109	0.0022551	0.166624	1.39809	0.72418	1.93058	IMAGE:44292	KRT8P12
110	0.0022606	0.166624	0.56761	1.22293	0.46414	IMAGE:565110
111	0.0022743	0.166624	1.31812	0.625895	2.10597	IMAGE:2577230	TNC
112	0.0022786	0.166624	1.39109	0.581436	2.3925	IMAGE:772437	PHLDB1
113	0.0022861	0.166624	0.576289	1.27047	0.453603	IMAGE:1625845
114	0.0023047	0.166624	0.647772	1.40409	0.461347	IMAGE:1202681
115	0.0023632	0.166624	1.46075	0.716437	2.0389	IMAGE:1558675	SOX10
116	0.0023668	0.166624	1.77792	0.766048	2.3209	IMAGE:430473	EPN2
117	0.0023819	0.166624	1.42219	0.71008	2.00285	IMAGE:365706	CYGB
118	0.0023896	0.166624	1.40502	0.608067	2.31063	IMAGE:22389	ACSS3
119	0.0023996	0.166624	1.2282	0.701764	1.75016	IMAGE:144740	STARD10
120	0.0024181	0.166624	1.36833	0.63146	2.16692	IMAGE:144786	BGN
121	0.0024191	0.166624	1.34964	0.665189	2.02895	IMAGE:85805	RBP4
122	0.0024796	0.166624	1.6126	0.670585	2.40476	IMAGE:2543464	SERPINA3
123	0.0024988	0.166624	1.29037	0.584597	2.20728	IMAGE:2016775	GPRC5B
124	0.0025121	0.166624	1.58592	0.671794	2.36073	IMAGE:756372	RARRES2
125	0.0025277	0.166624	1.42787	0.605252	2.35913	IMAGE:74537	AFP
126	0.0025424	0.166624	1.44051	0.66768	2.15748	IMAGE:34140	GCA
127	0.0025619	0.166624	1.4442	0.68475	2.10909	IMAGE:376290	TEAD1
128	0.0025824	0.166624	1.30279	0.62989	2.06829	IMAGE:1597856	APOA2
129	0.0026266	0.166624	0.662611	1.38173	0.479551	IMAGE:726449	Data not found
130	0.0026412	0.166624	1.74342	0.851669	2.04706	IMAGE:589869	WWTR1
131	0.0026427	0.166624	0.750184	1.25117	0.599588	IMAGE:123399	ADD1
132	0.002661	0.166624	0.405118	1.65758	0.244404	IMAGE:377799	CCNA1
133	0.0026874	0.166624	2.59464	0.755738	3.43326	IMAGE:359597	MLLT4
134	0.0026928	0.166624	1.52727	0.631315	2.41919	IMAGE:207274	In multiple ClusterIDs
135	0.0027323	0.166624	1.80244	0.592154	3.04387	IMAGE:669485	EGFR
136	0.002734	0.166624	2.0642	0.647758	3.18668	IMAGE:526134	ITGB4
137	0.002737	0.166624	1.8842	0.71641	2.63006	IMAGE:296815	DLK1
138	0.0027378	0.166624	2.82544	0.515601	5.47989	IMAGE:1049185	XAGE1A
139	0.0027645	0.166624	1.52734	0.700345	2.18084	IMAGE:2449343	PTPRH
140	0.0027764	0.166624	1.56935	0.663531	2.36515	IMAGE:1323785	THY1
141	0.0028006	0.166884	1.46403	0.534188	2.74067	IMAGE:269300	DDAH1
142	0.0028587	0.167748	1.4686	0.739791	1.98515	IMAGE:827187
143	0.0029077	0.167748	1.47631	0.662814	2.22734	IMAGE:135238	CASZ1
144	0.0029454	0.167748	1.61324	0.659983	2.44437	IMAGE:843222	COL5A1
145	0.0029664	0.167748	0.544857	1.56823	0.347434	IMAGE:2490112	P2RX1
146	0.0029843	0.167748	1.59663	0.742294	2.15094	IMAGE:296030	TRIM25
147	0.003011	0.167748	0.637284	1.391	0.458147	IMAGE:811859
148	0.003019	0.167748	1.61777	0.703378	2.3	IMAGE:1473274	MYL9
149	0.0030314	0.167748	1.33676	0.735457	1.8176	IMAGE:951305	IGFBPL1
150	0.0030499	0.167748	1.6756	0.697503	2.40229	IMAGE:145292	COL4A1
151	0.0030714	0.167748	1.3883	0.641117	2.16544	IMAGE:2391979	DHRS2
152	0.0031237	0.167748	1.51294	0.742972	2.03634	IMAGE:50704	ZNF616
153	0.0031395	0.167748	0.748174	1.62601	0.460128	IMAGE:292314	Data not found
154	0.0031571	0.167748	1.81921	0.639946	2.84276	IMAGE:307471	TSPAN7
155	0.0031684	0.167748	1.47827	0.67085	2.20358	IMAGE:151597	OSBPL10
156	0.0031752	0.167748	1.38126	0.713459	1.93601	IMAGE:293858	SACS
157	0.0031804	0.167748	0.723328	1.3008	0.556064	IMAGE:435817
158	0.0031912	0.167748	1.37462	0.733668	1.87363	IMAGE:1509761	KRT86
159	0.0032038	0.167748	1.38224	0.730127	1.89315	IMAGE:725649	NFATC4
160	0.0032121	0.167748	0.728206	1.28719	0.565732	IMAGE:232869	Data not found
161	0.0032144	0.167748	1.45597	0.715329	2.03539	IMAGE:841645	In multiple ClusterIDs
162	0.0032809	0.170161	1.59762	0.696366	2.29423	IMAGE:626967	ALPI
163	0.0033781	0.172954	0.541453	1.15465	0.468931	IMAGE:1033767	Data not found
164	0.0033951	0.172954	1.20737	0.744315	1.62213	*mitoch. cont. IMAGE:62241	Data not found
165	0.0033965	0.172954	0.521892	1.80759	0.288723	IMAGE:45778	AMPH
166	0.0035255	0.177012	1.71621	0.707155	2.42693	IMAGE:823688	MAN1A1
167	0.00353	0.177012	1.89167	0.682884	2.77012	IMAGE:269800	In multiple ClusterIDs
168	0.0035394	0.177012	1.47445	0.571933	2.57801	IMAGE:897592	FKBP10
169	0.0035957	0.177538	1.50018	0.763337	1.96529	IMAGE:744647	CTNNAL1
170	0.003598	0.177538	0.696483	1.46644	0.474948	IMAGE:1693581	Data not found
171	0.0036133	0.177538	1.44728	0.68021	2.12769	IMAGE:1839226
172	0.0036454	0.178074	0.698944	1.2988	0.538144	IMAGE:293895
173	0.0036895	0.178132	1.27078	0.615076	2.06605	IMAGE:471707	CAP2
174	0.0037174	0.178132	1.46548	0.762308	1.92243	IMAGE:1948377	SIGMAR1
175	0.0037364	0.178132	0.757086	1.4723	0.514219	IMAGE:588139	In multiple ClusterIDs
176	0.0037517	0.178132	1.39058	0.579924	2.39787	IMAGE:271985	TYR
177	0.0037526	0.178132	1.49268	0.763045	1.95622	IMAGE:877632	FLOT1
178	0.0038056	0.179633	1.35751	0.701126	1.93619	IMAGE:1576468	HSD17B2
179	0.0038368	0.180075	1.5364	0.557435	2.7562	IMAGE:377461	In multiple ClusterIDs
180	0.0038945	0.180075	0.73188	1.53141	0.477912	IMAGE:782822	Data not found
181	0.0039004	0.180075	1.34552	0.6823	1.97203	IMAGE:1475595	ALPL
182	0.0039007	0.180075	1.45893	0.795043	1.83503	IMAGE:142122	AFAP1
183	0.0039593	0.181782	0.699341	1.47617	0.473754	IMAGE:149446	Data not found
184	0.0040198	0.183556	0.687924	1.37172	0.501503	IMAGE:1591447
185	0.0040586	0.184326	1.29075	0.733985	1.75856	IMAGE:1607229
186	0.0040894	0.184727	1.32141	0.613997	2.15214	IMAGE:809694	CRABP1
187	0.0041216	0.185186	1.5086	0.76935	1.96087	IMAGE:2307420	TUBB2B
188	0.0042464	0.1878	1.74123	0.561644	3.10024	IMAGE:120162
189	0.0042513	0.1878	1.37177	0.732837	1.87186	IMAGE:177074	ZIC2
190	0.0042613	0.1878	1.35518	0.725043	1.86911	IMAGE:898092	CTGF
191	0.0042692	0.1878	1.48922	0.662765	2.24697	IMAGE:897781	KRT8
192	0.004348	0.19027	1.50429	0.71996	2.0894	IMAGE:842762	OSBPL10
193	0.0043853	0.190908	1.3197	0.74323	1.77563	IMAGE:743038	VCX3A
194	0.0045081	0.195168	0.700264	1.70031	0.411845	IMAGE:124083	Data not found
195	0.0045296	0.195168	0.788338	1.4416	0.54685	IMAGE:260273
196	0.0046076	0.196581	1.7741	0.847976	2.09216	IMAGE:143748	PLCG1
197	0.0046092	0.196581	1.12223	0.581598	1.92956	IMAGE:1412481	SPINK1
198	0.0046749	0.198207	1.21588	0.670695	1.81286	IMAGE:1913366	PRSS3
199	0.0047174	0.198207	1.31132	0.732283	1.79073	IMAGE:489519	TIMP3
200	0.0047181	0.198207	1.42715	0.701109	2.03556	IMAGE:510466	KRT19
201	0.0047485	0.198492	0.758285	1.58692	0.477836	IMAGE:136819	Data not found
202	0.0048365	0.200568	0.603831	1.29852	0.465016	IMAGE:1007464
203	0.0048459	0.200568	0.447987	2.65453	0.168763	IMAGE:67037	XIST
204	0.0049252	0.201612	1.37296	0.544659	2.52077	IMAGE:827168	ABCA1
205	0.0049664	0.201612	0.751415	1.2545	0.598974	IMAGE:196222
206	0.0049676	0.201612	1.35394	0.723734	1.87078	IMAGE:1469945	Data not found
207	0.0049898	0.201612	1.35451	0.818118	1.65564	IMAGE:42893	LOC642236
208	0.0049911	0.201612	1.25484	0.650215	1.92989	IMAGE:769857	CBS
209	0.0050926	0.204727	1.4487	0.712118	2.03435	IMAGE:1475659	PRSS8
210	0.0051227	0.204957	0.678427	1.37553	0.493213	IMAGE:950459	LOC100272216
211	0.0051992	0.20636	1.42624	0.751135	1.89878	IMAGE:724620
212	0.0052069	0.20636	0.691092	1.27683	0.541256	IMAGE:199344
213	0.005315	0.207776	1.45252	0.710828	2.04342	IMAGE:744047	PLK1
214	0.0053188	0.207776	1.48116	0.656866	2.25489	IMAGE:2252954	NEDD9
215	0.005339	0.207776	1.44062	0.715906	2.01231	IMAGE:2492177	FLOT1
216	0.0053485	0.207776	0.82201	1.36306	0.603064	IMAGE:417877
217	0.0053849	0.207776	1.5004	0.77252	1.94222	IMAGE:2018807	SDC3
218	0.0054229	0.207776	0.634029	2.3523	0.269535	IMAGE:292699	ANK1
219	0.005461	0.207776	1.45385	0.675111	2.1535	IMAGE:814054	KIAA0040
220	0.0054916	0.207776	1.18988	0.525532	2.26414	IMAGE:281392	DNER
221	0.005499	0.207776	0.727657	1.27253	0.57182	IMAGE:203551
222	0.0055094	0.207776	1.35441	0.675711	2.00442	IMAGE:878564	GPC3
223	0.0055478	0.207776	0.675212	1.34437	0.502252	IMAGE:429211
224	0.005584	0.207776	0.670184	1.18489	0.56561	IMAGE:586780
225	0.0056028	0.207776	0.773769	1.36041	0.568775	IMAGE:282564	RASSF6
226	0.0056112	0.207776	0.726475	1.70287	0.426617	IMAGE:811063
227	0.0056372	0.207776	1.46153	0.544049	2.6864	IMAGE:824870	SPRED2
228	0.0056383	0.207776	1.40189	0.789319	1.77607	IMAGE:810873	SCNN1A
229	0.005673	0.207898	1.53966	0.839928	1.83308	IMAGE:40303	SHC1
230	0.0056911	0.207898	2.01356	0.973164	2.06909	IMAGE:2417989	ZAP70
231	0.0057271	0.208308	1.20538	0.645236	1.86812	IMAGE:417867	XBP1
232	0.0057662	0.208337	1.33538	0.747579	1.78627	IMAGE:814995	SGOL2
233	0.0057775	0.208337	1.51907	0.640572	2.37143	IMAGE:176461	CKMT1B
234	0.005858	0.209549	1.23821	0.772365	1.60314	IMAGE:1394099	DSCC1
235	0.005861	0.209549	1.67773	0.633843	2.64691	IMAGE:1636447	GNG11
236	0.0059606	0.212207	0.77891	1.38749	0.56138	IMAGE:1635878
237	0.0060406	0.21241	0.714689	1.29551	0.551667	IMAGE:703820	CAPN3
238	0.0060482	0.21241	0.67329	1.35925	0.49534	IMAGE:418081	KIAA0831
239	0.0060506	0.21241	0.766612	1.27968	0.599066	IMAGE:738899	MSH3
240	0.0060674	0.21241	0.660878	1.34608	0.490964	IMAGE:1671529
241	0.0061283	0.213227	0.822964	1.69288	0.486132	IMAGE:320254	Data not found
242	0.0061415	0.213227	1.1449	0.630278	1.8165	IMAGE:1434897
243	0.0061895	0.213569	1.3875	0.780533	1.77763	IMAGE:878652	PCOLCE
244	0.0062109	0.213569	0.625745	2.13975	0.292439	IMAGE:268188	In multiple ClusterIDs
245	0.0062276	0.213569	0.745463	1.56188	0.477286	IMAGE:1592715	HOMER3
246	0.0062668	0.213748	1.98165	0.958732	2.06695	IMAGE:491751	ISG20
247	0.0062837	0.213748	1.68963	0.773226	2.18517	IMAGE:298417	TFF3
248	0.0063847	0.216308	1.56038	0.464234	3.3612	IMAGE:2469213	ANXA3
249	0.006417	0.216529	0.693542	1.2689	0.546567	IMAGE:782578	MXD4
250	0.0065357	0.218932	1.23587	0.725321	1.70389	IMAGE:306358	EIF4A3
251	0.0065645	0.218932	1.31868	0.673877	1.95686	IMAGE:586685	LGALS4
252	0.0065664	0.218932	1.28358	0.754651	1.70088	IMAGE:181730
253	0.0066599	0.220109	1.3177	0.745466	1.76762	IMAGE:307532	In multiple ClusterIDs
254	0.0066742	0.220109	1.28833	0.8142	1.58233	IMAGE:1470254	SAPS3
255	0.0066803	0.220109	1.85461	0.554412	3.34519	IMAGE:588057	EPS8L3
256	0.0068387	0.224448	1.19721	0.728118	1.64425	IMAGE:868871	YDD19
257	0.0069384	0.225582	1.29401	0.643432	2.01111	IMAGE:134829	APBB2
258	0.0069482	0.225582	1.58449	0.75016	2.1122	IMAGE:770910	ELF3
259	0.0069538	0.225582	0.792127	2.16083	0.366585	IMAGE:267252
260	0.0070032	0.226311	1.25421	0.748008	1.67674	IMAGE:28469	OXCT1
261	0.0071348	0.228116	0.529142	1.88739	0.280356	IMAGE:773236	FPR1
262	0.007147	0.228116	1.26725	0.559112	2.26654	IMAGE:1323591	SERPINA5
263	0.0071552	0.228116	1.47775	0.78537	1.88159	IMAGE:1635178	LOC389831
264	0.007233	0.228116	1.42536	0.717488	1.98659	IMAGE:502536	NRP2
265	0.007246	0.228116	0.829043	1.57061	0.527849	IMAGE:127119
266	0.0073215	0.228116	1.4359	0.699427	2.05297	IMAGE:1160531	ERBB3
267	0.0073351	0.228116	1.29235	0.727516	1.77639	IMAGE:629542	MYH1
268	0.0073395	0.228116	1.41337	0.662176	2.13444	IMAGE:269354	NRP2
269	0.0073469	0.228116	0.646799	1.86158	0.347445	IMAGE:2506534	KCNQ1
270	0.0073545	0.228116	1.36214	0.724521	1.88005	IMAGE:279972	UBE2J1
271	0.0073577	0.228116	1.20667	0.58704	2.05552	IMAGE:814353	PMAIP1
272	0.0074293	0.229489	1.58323	0.739688	2.14041	IMAGE:665404	LPAR6
273	0.007524	0.230334	1.49754	0.566535	2.64334	IMAGE:82236	SH2D4A
274	0.0075282	0.230334	0.638223	1.38179	0.46188	IMAGE:1116296	Data not found
275	0.0075389	0.230334	1.55418	0.73541	2.11335	IMAGE:1870935	In multiple ClusterIDs
276	0.0075996	0.23102	0.686802	1.25501	0.547248	IMAGE:1891471	Data not found
277	0.0076503	0.23102	1.2765	0.741221	1.72215	IMAGE:852577
278	0.0076823	0.23102	0.638613	1.34814	0.473699	IMAGE:110218
279	0.0077178	0.23102	1.3757	0.764836	1.79869	IMAGE:246722	SERPINE2
280	0.0077601	0.23102	1.5765	0.679517	2.32004	IMAGE:129024	FGL1
281	0.007777	0.23102	1.26023	0.685381	1.83872	IMAGE:138141	In multiple ClusterIDs
282	0.0077873	0.23102	1.43095	0.753549	1.89895	IMAGE:838611	APOD
283	0.0078233	0.23102	1.28015	0.852812	1.5011	IMAGE:503215	MSRB2
284	0.0078595	0.23102	1.57262	0.545311	2.8839	IMAGE:840944	In multiple ClusterIDs
285	0.0078848	0.23102	0.649237	1.57805	0.411418	IMAGE:1536188	RASGRP4
286	0.0078968	0.23102	1.29595	0.646083	2.00586	IMAGE:211758	EFNA5
287	0.0079117	0.23102	0.724513	1.27448	0.568478	IMAGE:1033739	RANBP9
288	0.0079188	0.23102	1.22068	0.718472	1.699	IMAGE:1601141	GDF3
289	0.0079787	0.231288	1.46586	0.692801	2.11584	IMAGE:813628	SCN2B
290	0.0080087	0.231288	1.23717	0.804306	1.53819	IMAGE:510729	PTPN21
291	0.0080294	0.231288	1.26227	0.691359	1.82578	IMAGE:146671	IL1R1
292	0.0080381	0.231288	0.825284	1.34112	0.615368	IMAGE:191866
293	0.0080683	0.231365	1.2858	0.763395	1.68432	IMAGE:2548367	ALDOC
294	0.0081181	0.232001	1.44624	0.740594	1.95282	IMAGE:309826	LAMA4
295	0.008147	0.232038	1.19364	0.68161	1.75121	IMAGE:32160	SEC23B
296	0.0082181	0.232788	1.69381	0.732696	2.31175	IMAGE:593840	TMEM98
297	0.0082355	0.232788	1.39593	0.75677	1.84459	IMAGE:2568350	KRT19
298	0.0082806	0.232788	0.633114	1.31912	0.479952	IMAGE:1561119
299	0.0083198	0.232788	1.55351	0.77355	2.00829	IMAGE:626842
300	0.0083277	0.232788	0.66994	1.61046	0.415992	IMAGE:229790
301	0.0083751	0.232788	1.58631	0.6936	2.28707	IMAGE:2578894	KRT5
302	0.0083893	0.232788	1.48004	0.711824	2.07922	IMAGE:122159	COL3A1
303	0.008395	0.232788	1.55755	0.69476	2.24185	IMAGE:154472	FGFR1
304	0.0085416	0.235793	0.586727	1.51283	0.387833	IMAGE:754031	GPR162
305	0.0085595	0.235793	1.60039	0.600658	2.66439	IMAGE:85840	NNMT
306	0.0086143	0.236527	1.58306	0.702174	2.25452	IMAGE:70500	TBX3
307	0.0086863	0.237448	1.51516	0.636843	2.37918	IMAGE:669375	DKK1
308	0.0087051	0.237448	0.738228	1.39306	0.529932	IMAGE:897292
309	0.008756	0.237448	0.602325	1.3955	0.43162	IMAGE:2310241	ASPH
310	0.0088449	0.237448	1.33996	0.763137	1.75586	IMAGE:590774	MAPK13
311	0.0088626	0.237448	0.682922	1.2855	0.531248	IMAGE:1899051
312	0.0088654	0.237448	1.34414	0.65714	2.04543	IMAGE:1847618	CD1A
313	0.0089001	0.237448	1.29045	0.622773	2.0721	IMAGE:2092597	GAGE12I
314	0.008909	0.237448	1.36965	0.788703	1.73659	IMAGE:290039	GPM6B
315	0.0089248	0.237448	1.48338	0.773511	1.91772	IMAGE:433162	POLE
316	0.0089462	0.237448	0.731942	1.29636	0.564614	IMAGE:291385
317	0.0089587	0.237448	0.68545	1.45887	0.469851	IMAGE:201784	Data not found
318	0.0090279	0.237879	1.6293	0.759879	2.14416	IMAGE:182288	DDR1
319	0.0090489	0.237879	0.676583	1.34378	0.503493	IMAGE:130053	In multiple ClusterIDs
320	0.0090599	0.237879	1.47684	0.778138	1.89792	IMAGE:247803	LOC151146
321	0.0091251	0.238844	1.4132	0.704039	2.00728	IMAGE:261519	In multiple ClusterIDs
322	0.0092222	0.239483	1.46383	0.684319	2.1391	IMAGE:145310
323	0.0092377	0.239483	1.26952	0.608757	2.08544	IMAGE:853789	TYRP1
324	0.0092443	0.239483	1.29584	0.722353	1.79392	IMAGE:878836	Data not found
325	0.0092635	0.239483	0.556016	1.27827	0.434974	IMAGE:277996	EIF4E3
326	0.0093351	0.24031	1.08551	0.717384	1.51315	IMAGE:292388	TMEM97
327	0.0093527	0.24031	0.602154	1.19756	0.502815	IMAGE:177737	PURA
328	0.0094187	0.241268	1.19233	0.771367	1.54574	IMAGE:787851	In multiple ClusterIDs
329	0.0094722	0.241901	1.27623	0.729616	1.74918	IMAGE:713031
330	0.0095478	0.243093	1.46717	0.776352	1.88982	IMAGE:132637	In multiple ClusterIDs
331	0.0095885	0.243392	0.785075	1.71287	0.458339	IMAGE:1899192	CCRL2
332	0.0096399	0.243489	1.47202	0.683771	2.15279	IMAGE:1573778	RASSF7
333	0.0096503	0.243489	0.709896	1.30636	0.543417	IMAGE:416855
334	0.0096941	0.243862	1.65942	0.670018	2.47668	IMAGE:742125	LOXL1
335	0.0097656	0.244927	1.37821	0.759024	1.81577	IMAGE:510145	In multiple ClusterIDs
336	0.0098498	0.24602	1.35078	0.656983	2.05603	IMAGE:82991	ENPP1
337	0.0098958	0.24602	0.617342	1.24771	0.49478	IMAGE:274979	NCRNA00103
338	0.0099086	0.24602	1.49054	0.761357	1.95774	IMAGE:269293	ARMC9
339	0.0099263	0.24602	0.821128	1.48489	0.552989	IMAGE:914188
340	0.010008	0.247315	1.25468	0.669738	1.87339	IMAGE:1586472	RAD54B
341	0.0101107	0.247412	0.71237	1.39795	0.509583	IMAGE:1900056	DUSP18
342	0.0101555	0.247412	1.17772	0.727484	1.61889	IMAGE:812975	KANK1
343	0.0101632	0.247412	1.30445	0.734528	1.77591	IMAGE:490718	NOTUM
344	0.0101794	0.247412	1.21373	0.694833	1.74679	IMAGE:742041	CALD1
345	0.0101827	0.247412	1.36619	0.65051	2.10019	IMAGE:633045	CDH13
346	0.0101886	0.247412	0.696225	1.52827	0.455563	IMAGE:146305
347	0.0102304	0.247711	0.68456	1.23974	0.552181	IMAGE:209179
348	0.0103586	0.249389	1.60401	0.82409	1.9464	IMAGE:744944	MYO6
349	0.0103787	0.249389	1.71441	0.914791	1.8741	IMAGE:122229	RGL1
350	0.0103956	0.249389	1.4619	0.746055	1.9595	IMAGE:293339	SNAI2
351	0.0104184	0.249389	0.767539	1.24838	0.614825	IMAGE:233246	Data not found
352	0.010458	0.249587	1.75103	0.672509	2.60373	IMAGE:415851	RND3
353	0.0104861	0.249587	1.30829	0.684608	1.91101	IMAGE:2310272	DHCR7
354	0.010546	0.250304	1.42211	0.741466	1.91797	IMAGE:811096	ITGB4
355	0.0106757	0.251183	1.23126	0.66961	1.83877	IMAGE:491694	FNDC3B
356	0.0106859	0.251183	1.897	0.649414	2.9211	IMAGE:436121	DLK1
357	0.010702	0.251183	1.37341	0.738367	1.86007	IMAGE:366887	In multiple ClusterIDs
358	0.0107097	0.251183	0.870228	1.37722	0.631871	IMAGE:310894	In multiple ClusterIDs
359	0.0107624	0.251183	1.39287	0.525205	2.65206	IMAGE:340722	MLF1
360	0.0107738	0.251183	1.21976	0.711537	1.71427	IMAGE:212188	APOH
361	0.0108959	0.251183	0.656836	1.25092	0.52508	IMAGE:121600
362	0.0109038	0.251183	0.693696	1.4331	0.484051	IMAGE:1662750	ZBTB11
363	0.0109164	0.251183	1.3056	0.672706	1.94083	IMAGE:1161662	MUC13
364	0.0109288	0.251183	1.55013	0.801054	1.93511	IMAGE:841641	In multiple ClusterIDs
365	0.0109378	0.251183	0.77632	1.50832	0.514692	IMAGE:140831	Data not found
366	0.0109547	0.251183	1.41231	0.724477	1.94941	IMAGE:595162	ROBO1
367	0.0109874	0.251183	1.50864	0.801765	1.88165	IMAGE:1564601	FAM111B
368	0.0110208	0.251183	1.34106	0.63345	2.11708	IMAGE:1636117	SUSD2
369	0.0110315	0.251183	0.784044	1.53412	0.511072	IMAGE:430003	Data not found
370	0.0111066	0.251971	0.701257	1.23078	0.569765	IMAGE:287349
371	0.011134	0.251971	1.26233	0.577233	2.18687	IMAGE:949988	LAPTM4B
372	0.0111728	0.251971	0.549253	1.28314	0.428055	IMAGE:2312250
373	0.0112033	0.251971	0.520154	1.83577	0.283344	IMAGE:1626812	Data not found
374	0.0112368	0.251971	1.24875	0.773052	1.61535	IMAGE:112564	In multiple ClusterIDs
375	0.011291	0.251971	0.839135	1.49073	0.562903	IMAGE:230509	Data not found
376	0.0112996	0.251971	1.60914	0.580354	2.77268	IMAGE:366950	SLPI
377	0.0113296	0.251971	1.31329	0.607414	2.1621	1276380	GOLGA6L5
378	0.011336	0.251971	1.44113	0.644822	2.23492	IMAGE:753104	In multiple ClusterIDs
379	0.0113745	0.25216	1.37159	0.63728	2.15225	IMAGE:511068	LGALS4
380	0.0115219	0.253463	1.42172	0.694145	2.04817	IMAGE:857640	COL6A2
381	0.0115277	0.253463	1.24693	0.696884	1.78929	IMAGE:75254	CSRP2
382	0.0115688	0.253463	0.877725	1.4917	0.588407	IMAGE:25507	In multiple ClusterIDs
383	0.0116066	0.253463	1.25594	0.699429	1.79566	IMAGE:204614	EIF4A1
384	0.0116229	0.253463	1.27631	0.678493	1.88109	IMAGE:2028725	TNK2
385	0.0116413	0.253463	1.24884	0.78852	1.58378	IMAGE:826273	CCNE2
386	0.0116482	0.253463	1.27673	0.793925	1.60813	IMAGE:627272	ZNF496
387	0.0117269	0.253463	1.92376	0.709262	2.71235	IMAGE:2012757	PXDN
388	0.0117832	0.253463	1.12837	0.586908	1.92256	IMAGE:129032	SERPINA5
389	0.0117922	0.253463	1.44696	0.785112	1.843	IMAGE:46862	CIT
390	0.011812	0.253463	1.57029	0.851431	1.84429	IMAGE:68794	SMAGP
391	0.0118476	0.253463	1.26147	0.66366	1.90078	IMAGE:754550	PDZRN3
392	0.0118496	0.253463	0.816152	1.47838	0.55206	IMAGE:417804
393	0.0119183	0.253463	1.16504	0.78937	1.47591	*mitoch. cont. IMAGE:1683822	Data not found
394	0.0119356	0.253463	0.673106	1.18966	0.565798	IMAGE:855632
395	0.0119411	0.253463	0.803078	1.32758	0.604917	IMAGE:415487	Data not found
396	0.0119725	0.253463	1.29353	0.691893	1.86956	IMAGE:593929	GRHL2
397	0.0119763	0.253463	1.7362	0.856837	2.02629	IMAGE:713660	GPM6B
398	0.0121418	0.255827	1.79418	0.655466	2.73726	IMAGE:741497	LCN2
399	0.0121489	0.255827	1.42875	0.750532	1.90365	IMAGE:784224	In multiple ClusterIDs
400	0.0122282	0.256853	0.772645	1.35703	0.569366	IMAGE:191519
401	0.0122792	0.257281	0.721934	1.26211	0.572007	IMAGE:238590	CD84
402	0.0123563	0.258253	0.768969	1.42864	0.538251	IMAGE:433513
403	0.0124349	0.25886	0.699627	1.3826	0.506021	IMAGE:430741
404	0.0124473	0.25886	1.53514	0.718584	2.13635	IMAGE:199367	Data not found
405	0.0124779	0.25886	1.54915	0.734073	2.11035	IMAGE:1983884	C19orf33
406	0.0125086	0.25886	0.675238	1.16221	0.580997	IMAGE:214624	Data not found
407	0.0127121	0.262425	1.49388	0.852304	1.75275	IMAGE:745604	BCAR1
408	0.0129053	0.265433	1.34239	0.622061	2.15796	IMAGE:767851	FBN1
409	0.0129431	0.265433	1.40655	0.770151	1.82633	IMAGE:1862628	In multiple ClusterIDs
410	0.0129526	0.265433	0.620861	1.52271	0.407734	IMAGE:139969	Data not found
411	0.0130015	0.265622	1.25516	0.549986	2.28217	IMAGE:1657762	ASAM
412	0.013025	0.265622	0.60663	1.28587	0.471766	IMAGE:868205	Data not found
413	0.0130683	0.265859	0.863169	1.35606	0.636526	IMAGE:868469
414	0.0131167	0.266105	1.21572	0.755497	1.60917	IMAGE:2248368	SAA2
415	0.0131437	0.266105	1.41681	0.582304	2.4331	IMAGE:868078
416	0.0131837	0.266273	0.745447	1.58151	0.471351	IMAGE:242012	Data not found
417	0.0132828	0.267631	1.37588	0.697817	1.97168	IMAGE:135630	CDS1
418	0.0133524	0.26839	1.20583	0.787655	1.53091	IMAGE:2504543	ZNF140
419	0.0134386	0.268707	1.24926	0.65172	1.91686	IMAGE:196992	AKR1C1
420	0.0134446	0.268707	1.48064	0.72707	2.03645	IMAGE:843321	KRT7
421	0.0135376	0.268707	1.33577	0.764751	1.74667	IMAGE:773976	FABP7
422	0.0135502	0.268707	1.76498	0.737902	2.39189	IMAGE:843028	MSLN
423	0.0135516	0.268707	1.51552	0.800069	1.89424	IMAGE:179211	GPR160
424	0.0135601	0.268707	1.39627	0.800267	1.74476	IMAGE:282108	AKAP2
425	0.0136438	0.26973	1.33236	0.756825	1.76046	IMAGE:647643	VCX
426	0.0137599	0.270411	1.22403	0.794198	1.54122	IMAGE:811808	FAM65A
427	0.0137622	0.270411	0.793666	1.8063	0.439388	IMAGE:120897
428	0.0137748	0.270411	1.37525	0.745066	1.84581	IMAGE:377282	SCD
429	0.0139085	0.271595	0.867291	1.47081	0.589667	IMAGE:138234
430	0.0139154	0.271595	0.700114	1.70656	0.410248	IMAGE:712186	Data not found
431	0.0139555	0.271595	1.39486	0.661879	2.10742	IMAGE:770388	CLDN4
432	0.0139946	0.271595	0.758333	1.42443	0.532378	IMAGE:1543803
433	0.0140762	0.271595	0.739125	1.48865	0.496507	IMAGE:1526827
434	0.014088	0.271595	0.645275	1.66104	0.388475	IMAGE:33293	CYTH4
435	0.0140999	0.271595	1.18654	0.744211	1.59436	IMAGE:1416055	ESPL1
436	0.0141203	0.271595	1.37668	0.728418	1.88996	IMAGE:2322039	PPL
437	0.014161	0.271595	1.43998	0.822766	1.75017	IMAGE:684277
438	0.0141617	0.271595	1.35177	0.71103	1.90114	IMAGE:151620	TMEM54
439	0.0141907	0.271595	1.11304	0.602686	1.8468	IMAGE:308163	YAP1
440	0.0143688	0.274379	1.62092	0.75666	2.1422	IMAGE:753028	In multiple ClusterIDs
441	0.0145248	0.27527	1.58659	0.747981	2.12117	IMAGE:324861	EGFR
442	0.0145589	0.27527	1.26012	0.778889	1.61785	IMAGE:240680	ARFGEF1
443	0.0145859	0.27527	0.873965	1.66316	0.525484	IMAGE:264858
444	0.0145882	0.27527	1.40607	0.669649	2.09972	IMAGE:327676	KRT13
445	0.0146182	0.27527	1.39638	0.711438	1.96275	IMAGE:510534	EPCAM
446	0.0146684	0.27527	1.17788	0.768226	1.53324	*mitoch. cont. IMAGE:1010056	Data not found
447	0.014676	0.27527	1.49295	0.644933	2.3149	IMAGE:1455603	DEPDC6
448	0.0147068	0.27527	1.90961	0.883099	2.1624	IMAGE:323371	APP
449	0.0147419	0.27527	0.673771	1.34163	0.502203	IMAGE:415594
450	0.0147484	0.27527	1.23703	0.644863	1.91829	IMAGE:199648
451	0.0147999	0.27527	1.18919	0.7996	1.48722	IMAGE:503097	PRPS2
452	0.0148086	0.27527	1.3577	0.633561	2.14296	IMAGE:810454	BACE2
453	0.0148743	0.275695	1.35501	0.746787	1.81446	IMAGE:842968	BUB1B
454	0.0148971	0.275695	1.34873	0.825058	1.63471	IMAGE:236059	GRB7
455	0.0149432	0.275835	1.57527	0.512201	3.0755	IMAGE:745689	PTGR1
456	0.0150211	0.275835	1.37562	0.685368	2.00712	IMAGE:1660645	CYP26A1
457	0.0150279	0.275835	1.37057	0.742394	1.84615	IMAGE:38642	CYP26A1
458	0.015036	0.275835	1.18111	0.797448	1.48111	IMAGE:2310841	PNO1
459	0.0150887	0.275898	1.40815	0.815124	1.72753	IMAGE:786072	MYO1C
460	0.0151277	0.275898	1.5208	0.690998	2.20087	IMAGE:1669672	Data not found
461	0.0151563	0.275898	0.71676	2.32217	0.30866	IMAGE:812126	GYPB
462	0.0151708	0.275898	0.71749	1.30777	0.548634	IMAGE:130737	Data not found
463	0.0153223	0.277578	1.30105	0.858858	1.51486	IMAGE:325513	Data not found
464	0.0153711	0.277578	1.26664	0.802982	1.57742	IMAGE:269050
465	0.0154012	0.277578	1.14931	0.765864	1.50068	IMAGE:202904	SFRS7
466	0.0154172	0.277578	1.36322	0.779092	1.74975	IMAGE:592540	KRT5
467	0.0154354	0.277578	1.40396	0.732469	1.91674	IMAGE:245039	GRTP1
468	0.0154831	0.277578	1.20333	0.687364	1.75064	IMAGE:341316	PAPD4
469	0.0154944	0.277578	1.3765	0.885881	1.55382	IMAGE:826974	NCOA5
470	0.0155802	0.277607	0.661433	1.21582	0.544021	IMAGE:125296
471	0.0156473	0.277607	1.44884	0.901301	1.6075	IMAGE:151055	ELOVL5
472	0.0156529	0.277607	1.41548	0.774678	1.82718	IMAGE:595593	SDC3
473	0.0156947	0.277607	1.42183	0.673289	2.11176	IMAGE:202658	TRPS1
474	0.0157235	0.277607	1.49695	0.665361	2.24984	IMAGE:153646	COL1A1
475	0.0157393	0.277607	1.53916	0.890873	1.7277	IMAGE:897531	In multiple ClusterIDs
476	0.0158	0.277607	0.805056	1.60297	0.502228	IMAGE:1699368	Data not found
477	0.0158192	0.277607	0.586657	1.28784	0.455536	IMAGE:143443	TBXAS1
478	0.0158302	0.277607	1.25929	0.825556	1.52539	*mitoch. cont. IMAGE:841448	Data not found
479	0.0158315	0.277607	0.771929	1.16902	0.660322	IMAGE:124002
480	0.0158595	0.277607	1.43586	0.75375	1.90496	IMAGE:753322	SYNCRIP
481	0.0159453	0.278529	1.46188	0.595084	2.4566	IMAGE:950479
482	0.0160644	0.278775	1.29159	0.679208	1.90161	IMAGE:1521972
483	0.0160691	0.278775	1.37216	0.690161	1.98817	IMAGE:324772	AMOTL2
484	0.0160763	0.278775	1.3037	0.847165	1.5389	IMAGE:1956910	WNK2
485	0.0160921	0.278775	1.37946	0.755302	1.82637	IMAGE:842918	FARP1
486	0.0162748	0.281055	1.31107	0.639186	2.05116	IMAGE:203544
487	0.0162906	0.281055	0.706596	1.42059	0.497397	IMAGE:1566612
488	0.0163405	0.281338	1.33371	0.653057	2.04225	IMAGE:460403
489	0.0164105	0.281965	1.41562	0.680249	2.08103	IMAGE:250654
490	0.0165379	0.283574	1.18882	0.684874	1.73583	IMAGE:153025	LIF
491	0.0165845	0.283653	1.40427	0.675543	2.07872	IMAGE:753301	CEACAM1
492	0.0166402	0.283653	0.642184	1.50158	0.427672	IMAGE:201039
493	0.0167672	0.283653	1.27949	0.718963	1.77964	IMAGE:429203	In multiple ClusterIDs
494	0.0168067	0.283653	1.22785	0.686496	1.78858	IMAGE:123474	SCD
495	0.0168543	0.283653	1.06844	0.536091	1.99301	IMAGE:247216	In multiple ClusterIDs
496	0.0169155	0.283653	1.39288	0.66242	2.10271	IMAGE:2349964	PDGFRL
497	0.0169176	0.283653	0.739713	1.35318	0.546647	IMAGE:121869
498	0.0169394	0.283653	1.22305	0.817297	1.49646	IMAGE:323988	In multiple ClusterIDs
499	0.0169447	0.283653	1.20227	0.752563	1.59756	IMAGE:81229	EMP2
500	0.0170105	0.283653	0.633141	1.40247	0.451448	IMAGE:810896
501	0.0170153	0.283653	0.663515	1.76587	0.375744	IMAGE:293178	Data not found
502	0.0170161	0.283653	1.1952	0.754777	1.58351	IMAGE:198312	TOMM70A
503	0.0170175	0.283653	1.20591	0.808441	1.49165	IMAGE:359836	C11orf57
504	0.0170432	0.283653	1.2325	0.811728	1.51837	IMAGE:172440	RAB6A
505	0.0170489	0.283653	1.3242	0.733493	1.80534	IMAGE:205049	HSPB8
506	0.0170837	0.28367	0.618283	1.60901	0.384263	IMAGE:281003	TARP
507	0.0171225	0.283754	1.58488	0.528591	2.99831	IMAGE:1655795	GNG12
508	0.0172321	0.284882	1.34502	0.781106	1.72194	IMAGE:296155	CDCA5
509	0.0172584	0.284882	1.29863	0.788811	1.64631	IMAGE:132015	RNF128
510	0.017314	0.284952	1.24777	0.753105	1.65684	IMAGE:242797
511	0.0173344	0.284952	1.36282	0.823449	1.65502	IMAGE:711857	FGFR1
512	0.0173706	0.284952	1.29838	0.724389	1.79238	IMAGE:2019116	SOX3
513	0.0173983	0.284952	1.42895	0.618067	2.31196	IMAGE:428100	In multiple ClusterIDs
514	0.0175317	0.286579	1.30532	0.771935	1.69098	IMAGE:359823
515	0.0175875	0.286932	1.36368	0.763068	1.7871	IMAGE:753271	NAV1
516	0.0176624	0.287392	1.13521	0.713008	1.59215	IMAGE:809910	IFITM3
517	0.0176841	0.287392	1.22261	0.834901	1.46437	IMAGE:50971	HSDL1
518	0.0177916	0.288064	1.27112	0.809586	1.57009	IMAGE:727104	ZNF202
519	0.017794	0.288064	1.38665	0.677094	2.04794	IMAGE:525763	KRT8
520	0.0178741	0.288804	0.769679	1.33331	0.577269	IMAGE:810983	C15orf39
521	0.0179377	0.288979	1.20174	0.813368	1.47748	IMAGE:826236	DICER1
522	0.0179537	0.288979	1.24833	0.757924	1.64704	IMAGE:562811	CUL5
523	0.0180468	0.289699	1.25768	0.716388	1.75559	IMAGE:292515	UAP1
524	0.0180701	0.289699	1.4773	0.866603	1.7047	IMAGE:289759	RNFT2
525	0.0181422	0.289699	1.0336	0.590298	1.75099	IMAGE:137535	TRIM24
526	0.0181529	0.289699	0.760445	1.53705	0.494744	IMAGE:2009178	Data not found
527	0.0182117	0.289699	1.56832	0.682981	2.29629	IMAGE:843041
528	0.0182684	0.289699	1.24759	0.688283	1.81261	IMAGE:1751408	GAGE10
529	0.0182714	0.289699	1.30443	0.791474	1.6481	IMAGE:71420	AIFM2
530	0.0182743	0.289699	1.35765	0.689832	1.96809	IMAGE:511045	LGALS4
531	0.0183919	0.291015	1.20186	0.814521	1.47554	IMAGE:366541	In multiple ClusterIDs
532	0.0184591	0.291084	0.74597	1.23078	0.606094	IMAGE:301817	LEAP2
533	0.0184656	0.291084	0.478831	1.41565	0.338241	IMAGE:1876531	CTSG
534	0.0185202	0.291398	1.43576	0.747801	1.91997	IMAGE:813408	SEZ6L2
535	0.0186221	0.292454	1.3917	0.759101	1.83335	IMAGE:772944	SPAG16
536	0.0186743	0.292727	1.33198	0.684512	1.94588	IMAGE:1590626	Data not found
537	0.0188626	0.294616	0.603688	1.99407	0.302741	IMAGE:202897	LILRB2
538	0.0189241	0.294616	1.46582	0.811712	1.80584	IMAGE:223483	DUSP1
539	0.0189767	0.294616	1.25829	0.681795	1.84556	IMAGE:448027	STXBP1
540	0.0189926	0.294616	0.764008	1.40227	0.544835	IMAGE:490668
541	0.0190431	0.294616	1.73212	0.9128	1.89759	IMAGE:272155	SRGAP2
542	0.0190798	0.294616	1.22307	0.83747	1.46044	IMAGE:2464833	OCRL
543	0.0190942	0.294616	1.34003	0.590019	2.27117	IMAGE:1474900	KRT15
544	0.0191126	0.294616	1.15696	0.775956	1.49101	IMAGE:745644	Data not found
545	0.0191139	0.294616	0.788587	1.2676	0.622113	IMAGE:135450
546	0.0191455	0.294616	1.30562	0.820761	1.59075	IMAGE:66556	MMACHC
547	0.0191833	0.294658	1.28586	0.762293	1.68683	IMAGE:760299	DKK3
548	0.0193229	0.295964	0.783036	1.49315	0.52442	IMAGE:127686	DIAPH1
549	0.0193837	0.295964	1.27244	0.740884	1.71746	IMAGE:241077	BAZ1A
550	0.0193886	0.295964	1.15566	0.796211	1.45146	IMAGE:1031744	YWHAZ
551	0.0194092	0.295964	0.789758	1.3049	0.605224	IMAGE:1500861	ATP6V0D2
552	0.0194875	0.296619	1.36084	0.829909	1.63975	IMAGE:49630	CACNA1D
553	0.0195664	0.296855	1.19101	0.817971	1.45606	IMAGE:1461274	BAZ1A
554	0.0195736	0.296855	1.45833	0.6291	2.31812	IMAGE:281778	TGFB2
555	0.0196148	0.296943	1.26547	0.83387	1.51759	IMAGE:823850	RAI14
556	0.0198549	0.300038	1.2154	0.7522	1.61579	IMAGE:1469292	PIM2
557	0.0199269	0.300196	1.76694	0.676811	2.61068	IMAGE:2555187	PRG2
558	0.019967	0.300196	1.57426	0.80514	1.95526	IMAGE:967930	CLDN4
559	0.0199726	0.300196	1.27721	0.848419	1.5054	IMAGE:1324976	CTSC
560	0.0201783	0.302423	0.669763	1.89146	0.354098	IMAGE:245979	EPB49
561	0.0202117	0.302423	1.28881	0.847397	1.52091	IMAGE:47665	FAM189B
562	0.0202287	0.302423	0.811194	1.30706	0.620625	IMAGE:122871
563	0.0203351	0.303128	1.31102	0.625757	2.0951	IMAGE:1699281	In multiple ClusterIDs
564	0.0203709	0.303128	1.77657	0.756817	2.34742	IMAGE:341588	In multiple ClusterIDs
565	0.0203994	0.303128	1.45132	0.780554	1.85934	IMAGE:667482	MAL
566	0.0204202	0.303128	1.13066	0.599793	1.88509	IMAGE:1626313	C5orf54
567	0.0205038	0.303404	0.804974	1.57254	0.511895	IMAGE:261592
568	0.020511	0.303404	0.741641	1.32832	0.558328	IMAGE:293936	Data not found
569	0.0205872	0.303996	0.731008	1.20491	0.606691	IMAGE:117770	Data not found
570	0.0207263	0.304669	1.27371	0.829768	1.53503	IMAGE:753907	In multiple ClusterIDs
571	0.0207503	0.304669	1.25425	0.543548	2.30753	IMAGE:2019101	AGT
572	0.0207647	0.304669	0.75143	1.34053	0.560547	IMAGE:1683721
573	0.0207778	0.304669	1.16325	0.71911	1.61763	IMAGE:814041	In multiple ClusterIDs
574	0.020899	0.304715	1.14515	0.63009	1.81745	IMAGE:878281	RPS6KC1
575	0.020999	0.304715	0.751406	1.37827	0.54518	IMAGE:593289	Data not found
576	0.0210151	0.304715	0.697538	1.07933	0.646267	IMAGE:123761	Data not found
577	0.0210398	0.304715	1.41721	0.727472	1.94813	IMAGE:897788	PTPRF
578	0.0210508	0.304715	1.55837	0.837307	1.86117	IMAGE:1031820	C10orf82
579	0.0210604	0.304715	1.27086	0.599099	2.12128	IMAGE:241097	Data not found
580	0.0211207	0.304715	1.34507	0.838493	1.60416	IMAGE:2220269	POU5F1
581	0.0211686	0.304715	1.29956	0.800688	1.62306	IMAGE:274638	CAD
582	0.0212961	0.304715	1.13869	0.731501	1.55665	IMAGE:155716	NRG1
583	0.0213456	0.304715	1.11111	0.738688	1.50417	IMAGE:767976	SFRS7
584	0.0214492	0.304715	1.21216	0.691235	1.75361	IMAGE:2557471	CRABP2
585	0.0214518	0.304715	1.15656	0.746968	1.54833	IMAGE:45632	GYS1
586	0.0214658	0.304715	1.34309	0.787818	1.70482	IMAGE:901655	PCOLCE
587	0.0214957	0.304715	0.738928	2.63058	0.280899	IMAGE:841046	VSIG4
588	0.0215033	0.304715	1.16947	0.715895	1.63357	IMAGE:725680	In multiple ClusterIDs
589	0.0215246	0.304715	1.39937	0.774116	1.80771	IMAGE:159608	In multiple ClusterIDs
590	0.0215518	0.304715	1.15507	0.787175	1.46737	IMAGE:511091	LOC400986
591	0.0215523	0.304715	1.19072	0.731915	1.62686	IMAGE:429376	IL17RB
592	0.0215596	0.304715	0.703988	1.31571	0.535062	IMAGE:212749
593	0.0216154	0.304715	1.28016	0.772823	1.65647	IMAGE:626385	PGM3
594	0.0216271	0.304715	1.24239	0.63397	1.9597	IMAGE:359191	HSPB8
595	0.0216302	0.304715	1.18033	0.775881	1.52128	IMAGE:842842	CRTAP
596	0.0217051	0.304715	1.51858	0.931199	1.63077	IMAGE:609530	In multiple ClusterIDs
597	0.021747	0.304715	0.811849	1.48539	0.546556	IMAGE:726782
598	0.0217716	0.304715	1.22996	0.805516	1.52692	IMAGE:34462	SRRM3
599	0.0217935	0.304715	1.37115	0.651261	2.10537	IMAGE:782547	PRSS23
600	0.0218469	0.304715	1.31131	0.768547	1.70622	IMAGE:625234	KDELR3
601	0.0218534	0.304715	0.84424	1.40839	0.599435	IMAGE:323251	In multiple ClusterIDs
602	0.0219124	0.304715	1.19865	0.62844	1.90734	IMAGE:69378
603	0.0219238	0.304715	1.51582	0.73992	2.04863	IMAGE:2057931	EPCAM
604	0.021971	0.304715	1.39212	0.801855	1.73612	IMAGE:741398	DDR1
605	0.0219752	0.304715	1.22196	0.824472	1.48211	IMAGE:37449	GAS2L1
606	0.0220022	0.304715	1.74916	0.817612	2.13935	IMAGE:1875192	DLG3
607	0.0220239	0.304715	1.18156	0.788698	1.49812	IMAGE:856535	MTHFD1
608	0.0220503	0.304715	0.757225	1.29242	0.585895	IMAGE:109123	LOC727820
609	0.0222242	0.304722	1.16648	0.762654	1.5295	IMAGE:754303	NLGN4X
610	0.0222306	0.304722	0.742144	1.44515	0.51354	IMAGE:195875	Data not found
611	0.0222377	0.304722	1.39952	0.743627	1.88202	IMAGE:68504	APOB
612	0.0222704	0.304722	1.248	0.805864	1.54864	IMAGE:503602	CAMK2N1
613	0.0222798	0.304722	1.41578	0.742104	1.9078	IMAGE:626390	LIMCH1
614	0.0222856	0.304722	0.81665	1.43696	0.568318	IMAGE:245422	ADD1
615	0.0223047	0.304722	1.2093	0.86125	1.40412	IMAGE:195852	In multiple ClusterIDs
616	0.0224477	0.305664	1.29332	0.776936	1.66464	IMAGE:448375	SNRNP200
617	0.0224716	0.305664	1.41925	0.888161	1.59797	IMAGE:839956	IGSF11
618	0.0224828	0.305664	1.27361	0.728464	1.74836	IMAGE:812033	GPC1
619	0.02258	0.305938	1.26371	0.658345	1.91952	IMAGE:2440877	BMP7
620	0.0225959	0.305938	1.41148	0.771883	1.82862	IMAGE:179276	FASN
621	0.0226321	0.305938	1.34908	0.649782	2.0762	IMAGE:823811
622	0.0226486	0.305938	1.24885	0.698402	1.78816	IMAGE:666451	PSD3
623	0.0227137	0.306325	1.16076	0.738518	1.57174	IMAGE:282895	LRRC16A
624	0.0229683	0.30874	1.38789	0.849654	1.63347	IMAGE:240480	In multiple ClusterIDs
625	0.0229735	0.30874	1.24751	0.767838	1.6247	IMAGE:2305636	CDH1
626	0.023003	0.30874	1.32245	0.766935	1.72434	IMAGE:284022	ARHGEF10
627	0.023063	0.309052	0.813267	1.41316	0.575496	IMAGE:202921
628	0.0232067	0.310063	1.49055	0.835006	1.78507	IMAGE:323599	INHBB
629	0.0232123	0.310063	1.9199	0.574619	3.34117	IMAGE:366902	SLPI
630	0.0233539	0.310692	1.61021	0.706741	2.27835	IMAGE:511233	PMEPA1
631	0.0233625	0.310692	1.7839	0.717618	2.48586	IMAGE:267202	ZNF462
632	0.0233703	0.310692	1.42259	0.809564	1.75723	IMAGE:79726	C17orf28
633	0.0235249	0.311926	1.33928	0.828708	1.61611	IMAGE:814014	ZNF184
634	0.0235374	0.311926	1.44297	0.906407	1.59197	IMAGE:740604	ISG20
635	0.0236468	0.312883	0.839135	1.41556	0.592794	IMAGE:260259
636	0.0237297	0.312922	1.0903	0.697501	1.56316	IMAGE:381036	PARD6B
637	0.0237574	0.312922	1.23758	0.638536	1.93815	IMAGE:897619	SFRS17A
638	0.0238081	0.312922	1.29469	0.710689	1.82174	IMAGE:85678	F2
639	0.023835	0.312922	1.24205	0.603592	2.05777	IMAGE:261194
640	0.023836	0.312922	1.37128	0.746918	1.83591	IMAGE:1626355	STK39
641	0.0239636	0.314106	1.48107	0.744604	1.98907	IMAGE:810801	In multiple ClusterIDs
642	0.024016	0.314193	0.886737	1.40704	0.630215	IMAGE:211940	NBN
643	0.0240517	0.314193	1.18565	0.732941	1.61767	IMAGE:83605	CPS1
644	0.0240824	0.314193	1.41135	0.814507	1.73277	IMAGE:1517595	MELK
645	0.0242381	0.315734	1.24021	0.762354	1.62681	IMAGE:2556526	RCAN1
646	0.0243771	0.316164	1.33082	0.893903	1.48878	IMAGE:1611306	MAGEA8
647	0.0244161	0.316164	1.27491	0.766841	1.66255	IMAGE:812965	MYC
648	0.0244373	0.316164	1.16725	0.750949	1.55437	IMAGE:795543	PRDX4
649	0.0244381	0.316164	1.21943	0.729341	1.67196	IMAGE:1476053	RAD51
650	0.0244757	0.316164	1.1498	0.802231	1.43325	IMAGE:878578	ALDOA
651	0.0244969	0.316164	0.737347	1.23381	0.597619	IMAGE:229862	Data not found
652	0.0245784	0.31673	0.767769	1.59444	0.481528	IMAGE:810761	CLDN10
653	0.0247435	0.318369	1.33808	0.786908	1.70043	IMAGE:451596	HSD3B7
654	0.0248486	0.318951	0.830032	1.27673	0.650121	IMAGE:296025	Data not found
655	0.0248647	0.318951	1.29121	0.571122	2.26084	IMAGE:289794	RASSF8
656	0.0249911	0.319964	0.612068	1.21701	0.502929	IMAGE:752837	IFFO2
657	0.0250198	0.319964	1.36916	0.677201	2.02179	IMAGE:915908	In multiple ClusterIDs
658	0.0252794	0.322341	0.808323	1.29521	0.624087	IMAGE:2310410	ATXN2L
659	0.0252824	0.322341	1.20461	0.770012	1.5644	IMAGE:290560	PNPT1
660	0.0253941	0.323275	0.632821	1.55817	0.406131	IMAGE:1693442	UGGT2
661	0.0254805	0.323672	1.0139	1.68005	0.603492	IMAGE:275798	ST3GAL5
662	0.0255024	0.323672	1.13688	0.770109	1.47625	IMAGE:490178	In multiple ClusterIDs
663	0.0256502	0.32417	1.29977	0.917595	1.4165	IMAGE:626765	FRMD8
664	0.0256625	0.32417	1.155	0.798399	1.44664	IMAGE:82879	MBL2
665	0.0256813	0.32417	1.18417	0.7158	1.65432	IMAGE:25499	PLXNA1
666	0.0256959	0.32417	1.23655	0.803513	1.53893	IMAGE:610136	MTF2
667	0.0258565	0.325149	1.13087	0.798723	1.41585	IMAGE:2578793	ALDOA
668	0.0258853	0.325149	0.774274	1.17805	0.657251	IMAGE:2021882	SCNN1D
669	0.0258896	0.325149	1.27536	0.779917	1.63525	IMAGE:1622149	EDA
670	0.025974	0.325172	0.699421	1.24671	0.561011	IMAGE:2116188	HDAC5
671	0.02603	0.325172	0.704137	2.41172	0.291964	IMAGE:1686218	FGL2
672	0.0260563	0.325172	1.268	0.88076	1.43967	IMAGE:156053	ANKRD50
673	0.0260742	0.325172	1.27139	0.704584	1.80446	IMAGE:280004	MBNL1
674	0.026085	0.325172	1.276	0.830157	1.53706	IMAGE:194986	RBBP6
675	0.0261864	0.325477	1.18104	0.653426	1.80746	IMAGE:595697	RNF43
676	0.0261869	0.325477	0.790173	1.40208	0.563573	IMAGE:211878
677	0.0262335	0.325574	1.28585	0.639198	2.01166	IMAGE:85514	In multiple ClusterIDs
678	0.0264348	0.327124	1.08983	0.645446	1.6885	IMAGE:259066	FNDC3B
679	0.0264495	0.327124	0.783067	1.91823	0.408224	IMAGE:787854	LRRN3
680	0.0265913	0.327124	1.39206	0.737714	1.887	IMAGE:782497	C16orf45
681	0.0265932	0.327124	1.17832	0.782784	1.50529	IMAGE:897164	CTNNA1
682	0.0266068	0.327124	0.833065	1.41544	0.588555	IMAGE:884884	Data not found
683	0.0266134	0.327124	0.866721	1.49602	0.579353	IMAGE:1627636
684	0.0266476	0.327124	0.789291	1.75585	0.44952	IMAGE:206816	CECR1
685	0.0266698	0.327124	1.20351	0.798485	1.50724	IMAGE:429047	TTC3
686	0.0268154	0.32843	0.789502	1.37418	0.574526	IMAGE:121159	C15orf39
687	0.026963	0.329757	1.06275	0.643888	1.65052	IMAGE:592728	ACP6
688	0.0270735	0.330627	1.32242	0.743596	1.77841	IMAGE:2220229	EPHA4
689	0.0271322	0.330794	0.647863	1.1535	0.561651	IMAGE:233619	LRRFIP1
690	0.0271659	0.330794	1.47097	0.774972	1.89809	IMAGE:773335	In multiple ClusterIDs
691	0.0272099	0.33085	0.799068	1.44906	0.55144	IMAGE:277760	Data not found
692	0.0273659	0.331357	1.64053	0.725282	2.26192	IMAGE:196012	GLS
693	0.0273833	0.331357	1.12372	0.769923	1.45953	IMAGE:824025	SCAMP1
694	0.0273994	0.331357	0.814673	1.50461	0.541452	IMAGE:825859
695	0.0274093	0.331357	0.665647	2.02499	0.328716	IMAGE:1915096	LILRB4
696	0.0277995	0.33505	1.26404	0.725519	1.74226	IMAGE:345626	FABP7
697	0.0278031	0.33505	1.70819	0.565682	3.01969	IMAGE:135221	S100P
698	0.0278594	0.33505	1.45945	0.742411	1.96583	IMAGE:878182	A2M
699	0.0278743	0.33505	1.4906	0.881236	1.69148	IMAGE:1015874	BARD1
700	0.0279177	0.335092	0.778173	1.18895	0.654506	IMAGE:461930	Data not found
701	0.0279679	0.335216	1.05417	0.706985	1.49107	IMAGE:80374	PDHA1
702	0.0280324	0.33551	0.742615	1.65987	0.447393	IMAGE:137885
703	0.0281321	0.336225	1.39481	0.954475	1.46133	IMAGE:756272	TCF7
704	0.0282754	0.336622	1.21551	0.65413	1.85821	IMAGE:1584142	PAGE1
705	0.0283361	0.336622	0.732081	1.19921	0.610469	IMAGE:362419	TBC1D9B
706	0.0283466	0.336622	1.93495	0.842298	2.29723	IMAGE:325822	TGFA
707	0.028378	0.336622	1.53855	0.770667	1.99639	IMAGE:2568869	EXT1
708	0.0284376	0.336622	0.831904	1.35188	0.61537	IMAGE:588531
709	0.0284425	0.336622	1.26744	0.830579	1.52597	IMAGE:824665	SLC7A1
710	0.0284458	0.336622	1.33178	0.808154	1.64793	IMAGE:204214	CDC6
711	0.0288046	0.340388	1.4228	0.536684	2.65109	IMAGE:130057	In multiple ClusterIDs
712	0.0292516	0.344327	0.611769	1.20623	0.507176	IMAGE:1202578	Data not found
713	0.029272	0.344327	0.829159	1.30637	0.634706	IMAGE:726236	In multiple ClusterIDs
714	0.0293066	0.344327	1.30478	0.820445	1.59033	IMAGE:2028976	Data not found
715	0.0294074	0.344327	0.883062	2.199	0.401575	IMAGE:2333826	LY86
716	0.0294735	0.344327	1.41965	0.788894	1.79955	IMAGE:109309	In multiple ClusterIDs
717	0.029517	0.344327	1.17291	0.80368	1.45942	IMAGE:282404	KIAA1671
718	0.0295348	0.344327	0.703363	1.19298	0.589583	IMAGE:297883
719	0.0295528	0.344327	1.46427	0.682573	2.14523	IMAGE:293917	SPARC
720	0.0295734	0.344327	1.11654	0.722106	1.54623	IMAGE:246524	CHEK1
721	0.0295775	0.344327	1.32533	0.858691	1.54342	IMAGE:248957
722	0.0295887	0.344327	1.18359	0.800758	1.47809	IMAGE:209066	AURKA
723	0.029779	0.344687	0.772032	1.36837	0.564199	IMAGE:121573	Data not found
724	0.0298051	0.344687	1.27035	0.631112	2.01287	IMAGE:291880	MFAP2
725	0.0298686	0.344687	1.11671	0.683235	1.63444	IMAGE:37980	ZIC2
726	0.0299243	0.344687	0.769826	1.32352	0.581651	IMAGE:433659
727	0.0299921	0.344687	1.33281	0.704033	1.8931	IMAGE:321885	DDX3Y
728	0.0300035	0.344687	1.3945	0.699426	1.99378	IMAGE:1493107	PTGR1
729	0.0300496	0.344687	0.756334	1.37025	0.55197	IMAGE:436059
730	0.0300523	0.344687	1.19424	0.601253	1.98626	IMAGE:289057	C3orf14
731	0.0300718	0.344687	1.12393	0.723461	1.55354	IMAGE:296495	RAB6A
732	0.0301334	0.344687	1.1974	0.754002	1.58806	IMAGE:469762	In multiple ClusterIDs
733	0.0301385	0.344687	1.27681	0.870819	1.46622	IMAGE:1175398	YARS
734	0.0301507	0.344687	0.67767	1.16135	0.583521	IMAGE:416578	Data not found
735	0.0301529	0.344687	1.35535	0.593379	2.28412	IMAGE:882467	Data not found
736	0.0302383	0.345193	1.22736	0.576213	2.13005	IMAGE:1899338	MAN1A2
737	0.0305134	0.347643	1.29452	0.802058	1.61399	IMAGE:2321596	RGS2
738	0.0305585	0.347643	1.36498	0.709904	1.92277	IMAGE:1606321	TMC4
739	0.030577	0.347643	1.12974	0.632823	1.78524	IMAGE:34905	FNDC3B
740	0.0307063	0.347848	0.710036	1.31367	0.540497	IMAGE:2460509	ACPP
741	0.0307391	0.347848	0.8113	1.59674	0.508099	IMAGE:898328	PHC2
742	0.0307949	0.347848	0.710464	1.34369	0.528743	IMAGE:1875288
743	0.0308725	0.347848	1.10438	0.747871	1.47669	IMAGE:260336	ORC3L
744	0.0308753	0.347848	1.46218	0.841216	1.73817	IMAGE:366414	UHRF1
745	0.0309212	0.347848	0.75624	1.55658	0.485834	IMAGE:504647	FAM49A
746	0.0309425	0.347848	0.748414	1.32632	0.564278	IMAGE:942308
747	0.0310251	0.347848	0.782378	1.44205	0.542547	IMAGE:1585517	KLRB1
748	0.0311344	0.347848	1.1807	0.792852	1.48918	IMAGE:593431	In multiple ClusterIDs
749	0.0311346	0.347848	1.43663	0.615718	2.33325	IMAGE:506658	YAP1
750	0.0311735	0.347848	0.840485	1.33462	0.629757	IMAGE:239943
751	0.0311753	0.347848	1.39133	0.795293	1.74946	IMAGE:759948	S100B
752	0.0312269	0.347848	1.05871	0.6808	1.5551	IMAGE:137387	TFAP2A
753	0.0312341	0.347848	1.21311	0.854229	1.42012	IMAGE:860000	RFC2
754	0.0312391	0.347848	1.46034	0.715592	2.04074	IMAGE:769028	MEOX1
755	0.0312575	0.347848	1.27964	0.724635	1.76591	IMAGE:2466969	CTDSPL
756	0.0314595	0.349183	1.24506	0.786586	1.58287	IMAGE:645913	AZIN1
757	0.0314978	0.349183	1.18151	0.738232	1.60045	IMAGE:1607129	POU5F1
758	0.0315021	0.349183	1.38339	0.824844	1.67715	IMAGE:52430	SALL2
759	0.0315475	0.349225	1.23774	0.80892	1.53011	IMAGE:788832	GDF15
760	0.0322234	0.355843	1.11607	0.713561	1.56408	IMAGE:264597	NMD3
761	0.03223	0.355843	0.79877	1.38256	0.577745	IMAGE:245000	EWSR1
762	0.0323484	0.356681	0.769115	1.22577	0.627452	IMAGE:1534799	PRO0628
763	0.032434	0.356944	1.1997	0.758752	1.58115	IMAGE:1901472
764	0.0324572	0.356944	1.74565	0.837282	2.0849	IMAGE:1759254	UBASH3B
765	0.0325393	0.357379	1.16304	0.774528	1.50161	IMAGE:949939	PGK1
766	0.0326157	0.357623	0.663497	1.19063	0.557267	IMAGE:433300	Data not found
767	0.0326904	0.357623	1.21021	0.828816	1.46017	IMAGE:826133	BTBD2
768	0.0326923	0.357623	1.20317	0.74075	1.62425	IMAGE:2409751	ESPL1
769	0.0328136	0.357623	1.20452	0.734135	1.64073	IMAGE:266361	MLANA
770	0.0328143	0.357623	1.24325	0.768827	1.61707	IMAGE:1535070	GLS
771	0.0328291	0.357623	0.788061	1.30383	0.604422	IMAGE:1908808
772	0.0328696	0.357623	1.50504	0.852285	1.76589	IMAGE:843249	In multiple ClusterIDs
773	0.0329434	0.357623	1.23977	0.778345	1.59282	IMAGE:80162	RAD51C
774	0.0329455	0.357623	0.727816	1.1376	0.639783	IMAGE:785907	FNBP1
775	0.0329923	0.357623	0.804934	1.4966	0.53784	IMAGE:824384	CD37
776	0.0330417	0.357623	0.726841	1.28718	0.564675	IMAGE:140000	Data not found
777	0.0330723	0.357623	1.32686	0.811049	1.63598	IMAGE:811923	POLE
778	0.0332364	0.357799	1.09955	0.580756	1.89332	IMAGE:768443	MGST1
779	0.0332581	0.357799	1.46373	0.664498	2.20277	IMAGE:1637726	Data not found
780	0.03327	0.357799	1.2374	0.745049	1.66083	IMAGE:781047	BUB1
781	0.0332863	0.357799	1.1722	0.84765	1.38288	IMAGE:626531	In multiple ClusterIDs
782	0.0333015	0.357799	1.17043	0.509629	2.29663	IMAGE:590145	SH3BP4
783	0.0333605	0.357976	0.712686	1.40115	0.508642	IMAGE:111370	Data not found
784	0.0334332	0.358298	1.24848	0.750341	1.66388	IMAGE:68557	FABP1
785	0.0335205	0.358361	1.32003	0.665416	1.98376	IMAGE:136409	CTTNBP2NL
786	0.0335244	0.358361	1.45262	0.876011	1.65822	IMAGE:924007	MYC
787	0.0335793	0.358492	1.11179	0.701739	1.58433	IMAGE:824908	TMEM49
788	0.0337079	0.358709	1.36132	0.731473	1.86106	IMAGE:610883	PCDHA@
789	0.0337259	0.358709	0.772769	1.24476	0.620819	IMAGE:1567220
790	0.0337277	0.358709	1.15143	0.80444	1.43134	IMAGE:1857171
791	0.0337963	0.358984	1.16941	0.747438	1.56456	IMAGE:595328	CD2AP
792	0.0338799	0.359056	1.34535	0.830827	1.61929	IMAGE:502499	PMM1
793	0.0338885	0.359056	1.53693	0.77038	1.99503	IMAGE:488258	COL16A1
794	0.0339336	0.359081	1.2477	0.79443	1.57056	IMAGE:362729	SCRN1
795	0.034097	0.360206	1.17751	0.762899	1.54346	IMAGE:1492594	C12orf24
796	0.0341479	0.360206	1.40697	0.919195	1.53066	IMAGE:462113	ARID3A
797	0.0342016	0.360206	1.42545	0.688391	2.07069	IMAGE:725143	VTCN1
798	0.0342114	0.360206	1.20516	0.771933	1.56123	IMAGE:711698	BRCA2
799	0.0343088	0.360651	1.17564	0.71264	1.6497	IMAGE:430318	PVALB
800	0.0343395	0.360651	0.623188	1.35938	0.458435	IMAGE:767281
801	0.0345287	0.361181	0.751349	1.2766	0.588557	IMAGE:1508482
802	0.0345551	0.361181	1.24323	0.787089	1.57953	IMAGE:815026	CSTF3
803	0.0345632	0.361181	1.17571	0.756725	1.55368	IMAGE:301976	PPP3CC
804	0.0346004	0.361181	1.44243	0.82753	1.74305	IMAGE:2307015	SPAG5
805	0.0346049	0.361181	0.682755	1.14192	0.597901	IMAGE:1630335	Data not found
806	0.034675	0.361463	1.28094	0.845059	1.5158	IMAGE:769698
807	0.0347452	0.361746	1.17876	0.666726	1.76798	IMAGE:377384	In multiple ClusterIDs
808	0.0348377	0.361929	0.826105	1.22689	0.673334	IMAGE:435625	PTPRA
809	0.0348489	0.361929	0.845474	1.31275	0.64405	IMAGE:841161
810	0.0351777	0.364286	1.20321	0.832352	1.44555	IMAGE:825847	HM13
811	0.0352038	0.364286	1.26932	0.858634	1.4783	IMAGE:780958
812	0.0352063	0.364286	1.2911	0.774515	1.66698	IMAGE:2305693	L1CAM
813	0.0352659	0.364286	1.20238	0.756797	1.58878	IMAGE:1636844	RNF14
814	0.0353164	0.364286	1.27637	0.833006	1.53224	IMAGE:840687	MUC1
815	0.035336	0.364286	0.784969	1.32133	0.594075	IMAGE:1690055	Data not found
816	0.0354587	0.36461	1.27532	0.643046	1.98325	IMAGE:810213	IL1R1
817	0.0355612	0.36461	1.23119	0.837214	1.47058	IMAGE:34773	PTPN11
818	0.0355984	0.36461	0.722105	1.32244	0.546039	IMAGE:209683	TNFRSF10B
819	0.0356014	0.36461	0.746712	1.41669	0.527081	IMAGE:1540023
820	0.0356295	0.36461	1.47535	0.620963	2.3759	IMAGE:200656
821	0.035633	0.36461	1.07954	0.749268	1.4408	IMAGE:823627	ZC3H14
822	0.0356712	0.36461	1.36996	0.777144	1.76282	IMAGE:897603	MTUS1
823	0.0358758	0.366063	1.34186	0.836863	1.60345	IMAGE:996915	PGAM5
824	0.0359142	0.366063	1.19078	0.804898	1.47942	IMAGE:489680	NCKAP1
825	0.0359916	0.366063	0.792038	1.31405	0.602747	IMAGE:1690060
826	0.0360357	0.366063	1.45401	0.57563	2.52594	IMAGE:41648	IL13RA2
827	0.0360541	0.366063	0.904353	1.36261	0.663691	IMAGE:244012	SH3BGRL
828	0.0360748	0.366063	0.681559	1.06905	0.63754	IMAGE:214043
829	0.0363115	0.367837	1.41546	0.844719	1.67565	IMAGE:141314	LMCD1
830	0.0363371	0.367837	0.759563	1.28192	0.592518	IMAGE:1190944	Data not found
831	0.0365029	0.368548	1.52223	0.779604	1.95256	IMAGE:726144	ITGA3
832	0.036521	0.368548	0.805863	1.40443	0.573801	IMAGE:361897	Data not found
833	0.0365632	0.368548	1.34811	0.7411	1.81906	IMAGE:486984	NAV1
834	0.0365828	0.368548	1.28338	0.791136	1.6222	IMAGE:2577882	TPM2
835	0.03669	0.369185	1.29825	0.649587	1.99857	IMAGE:126413	ITIH2
836	0.0368093	0.369592	1.33868	0.752767	1.77835	IMAGE:1476065	STMN1
837	0.036836	0.369592	1.09187	0.672714	1.62308	IMAGE:510369	ZNF691
838	0.0368966	0.369592	1.25503	0.747438	1.67911	IMAGE:415064	LOC645561
839	0.0369159	0.369592	1.3227	0.797897	1.65773	IMAGE:595529	In multiple ClusterIDs
840	0.0369874	0.369592	0.670805	1.29329	0.51868	IMAGE:295497
841	0.0370107	0.369592	1.30724	0.753554	1.73477	IMAGE:840691	STAT1
842	0.0370476	0.369592	1.4094	0.844826	1.66827	IMAGE:856289	CCNB2
843	0.0370824	0.369592	0.648759	1.19453	0.54311	IMAGE:207794	In multiple ClusterIDs
844	0.0372114	0.369839	0.679397	1.50501	0.451424	IMAGE:1010955	TARP
845	0.0372304	0.369839	1.10671	0.679889	1.62778	IMAGE:838373	DHX9
846	0.0372392	0.369839	1.26929	0.856029	1.48276	IMAGE:1602209	ST3GAL1
847	0.0373099	0.370074	1.41322	0.716347	1.97282	IMAGE:714106	PLAU
848	0.037351	0.370074	1.22008	0.718195	1.69881	IMAGE:83995	In multiple ClusterIDs
849	0.0374793	0.370423	1.34682	0.781033	1.72441	IMAGE:120138	DNAJC12
850	0.0375461	0.370423	0.817046	1.39915	0.58396	IMAGE:1587710	PER1
851	0.0375521	0.370423	1.47137	0.598641	2.45785	IMAGE:2508044	HP
852	0.0375718	0.370423	0.643849	1.71736	0.374906	IMAGE:745514	Data not found
853	0.0376066	0.370423	1.16988	0.781152	1.49763	IMAGE:109488	MFSD8
854	0.0376953	0.370723	1.41695	0.705204	2.00928	IMAGE:487878
855	0.0377445	0.370723	1.20274	0.571256	2.10544	IMAGE:293569	C1orf21
856	0.0377694	0.370723	1.0615	0.763226	1.39081	IMAGE:1457416	DST
857	0.0379359	0.37188	0.6684	1.03837	0.643701	IMAGE:2225003
858	0.0379758	0.37188	1.15171	0.761764	1.5119	IMAGE:627616	C11orf57
859	0.0382734	0.373558	1.20648	0.757615	1.59247	IMAGE:1661949	ABI2
860	0.0383177	0.373558	1.2173	0.701299	1.73578	IMAGE:284497	CD109
861	0.0383304	0.373558	1.36188	0.716539	1.90064	IMAGE:769959	COL4A2
862	0.0384768	0.373558	1.04092	0.67363	1.54524	IMAGE:595109	ALG8
863	0.0385061	0.373558	1.296	0.685841	1.88964	IMAGE:284100	COLEC12
864	0.0385327	0.373558	0.904849	1.37226	0.659385	IMAGE:384134
865	0.0385434	0.373558	1.30064	0.747336	1.74036	IMAGE:824602	IFI16
866	0.0385453	0.373558	1.70286	0.82616	2.06117	IMAGE:462849	SLC41A1
867	0.0385473	0.373558	1.38966	0.773567	1.79643	IMAGE:130100	In multiple ClusterIDs
868	0.0386405	0.374029	0.63722	1.2482	0.510512	IMAGE:450588	CALCOCO2
869	0.03869	0.374078	1.328	0.720024	1.84438	IMAGE:1492463	SEPX1
870	0.0388185	0.374889	0.876327	1.30086	0.673654	IMAGE:450819	Data not found
871	0.0388968	0.375213	1.20451	0.818499	1.47161	IMAGE:279152	C16orf72
872	0.0390076	0.375851	1.36076	0.812719	1.67433	IMAGE:897997	SMC1A
873	0.0390567	0.375893	0.876788	1.27628	0.686988	IMAGE:1869223
874	0.0392218	0.376269	1.16422	0.806132	1.44421	IMAGE:502739	AGPAT5
875	0.0392271	0.376269	1.2315	0.757468	1.62581	IMAGE:811101	SH3RF1
876	0.0392537	0.376269	1.46179	0.771008	1.89594	IMAGE:2256743	COL3A1
877	0.0392974	0.376269	1.30914	0.844827	1.54959	IMAGE:2316594	Data not found
878	0.0393409	0.376269	1.25085	0.802032	1.5596	IMAGE:1642145	SATB2
879	0.0393918	0.376269	0.823798	1.24733	0.660451	IMAGE:108851	Data not found
880	0.0394093	0.376269	1.1325	0.777531	1.45653	IMAGE:307645	GIGYF1
881	0.0395929	0.377593	1.65812	0.74432	2.2277	IMAGE:460646	MYO10
882	0.0397685	0.377856	1.18315	0.757741	1.56141	IMAGE:154482	SERPINB1
883	0.0397925	0.377856	1.29953	0.871649	1.49089	IMAGE:897107	SLC25A1
884	0.0398143	0.377856	1.59664	0.548238	2.91231	IMAGE:376296	TACSTD2
885	0.0398545	0.377856	1.45032	0.828174	1.75123	IMAGE:844680	TRD@
886	0.0399028	0.377856	1.26637	0.73665	1.71909	IMAGE:2138919	VIL1
887	0.0399345	0.377856	1.16902	0.837328	1.39614	IMAGE:825416	LIMS1
888	0.0399897	0.377856	1.30999	0.880616	1.48758	IMAGE:49229	GPHN
889	0.0400053	0.377856	1.19898	0.822139	1.45837	IMAGE:951449	In multiple ClusterIDs
890	0.0400252	0.377856	0.504238	1.01526	0.49666	IMAGE:1561558	TCF4
891	0.0402405	0.379233	1.44409	0.837571	1.72413	IMAGE:1475968	TEAD2
892	0.0402738	0.379233	1.22393	0.795438	1.53869	IMAGE:366057	CDC25A
893	0.0404785	0.379233	1.17404	0.740161	1.5862	IMAGE:768481	FAM45A
894	0.0405241	0.379233	0.773025	1.54519	0.500279	IMAGE:2345206	CCR7
895	0.0405492	0.379233	0.756317	1.42003	0.532605	IMAGE:2191807	POU2F3
896	0.0406343	0.379233	1.22492	0.822501	1.48927	IMAGE:44026	PAPOLA
897	0.0406989	0.379233	0.658497	1.33052	0.494918	IMAGE:46108
898	0.0407263	0.379233	0.640051	1.24277	0.51502	IMAGE:2168378	RRP7B
899	0.0408357	0.379233	1.32889	0.675198	1.96815	IMAGE:142788	SERPINH1
900	0.0408727	0.379233	1.35906	0.851088	1.59685	IMAGE:282356	In multiple ClusterIDs
901	0.040892	0.379233	1.1914	0.815153	1.46157	IMAGE:854843	ZBED5
902	0.0409454	0.379233	0.748932	1.38583	0.540423	IMAGE:325172	GM2A
903	0.0409609	0.379233	1.20328	0.814437	1.47744	IMAGE:773599	RBBP4
904	0.0409648	0.379233	1.29218	0.814055	1.58733	IMAGE:451907	ZWINT
905	0.0410072	0.379233	0.782121	1.4061	0.556235	IMAGE:1877120	PTGER2
906	0.0410484	0.379233	1.29266	0.918132	1.40792	IMAGE:502333	NCOA3
907	0.0411085	0.379233	0.772601	1.5056	0.513151	IMAGE:245970	BST1
908	0.0411745	0.379233	1.35235	0.867459	1.55898	IMAGE:1917809
909	0.0412032	0.379233	1.1369	0.702817	1.61763	IMAGE:588053	TMEM45B
910	0.0412761	0.379233	0.834267	1.3978	0.596844	IMAGE:1384299
911	0.0413353	0.379233	0.631843	1.87391	0.337178	IMAGE:1422194	LILRB3
912	0.0413468	0.379233	1.15081	0.771158	1.49232	IMAGE:450533	SERPINA3
913	0.0413621	0.379233	0.789967	1.30563	0.605047	IMAGE:428267
914	0.0413773	0.379233	0.752744	1.40926	0.534139	IMAGE:296022	CIR1
915	0.0413911	0.379233	1.10043	0.757165	1.45336	IMAGE:1486109	EIF3I
916	0.0414781	0.379233	1.23828	0.666886	1.8568	IMAGE:788541	SLC38A1
917	0.0416495	0.379233	1.27229	0.735552	1.7297	IMAGE:1031402	PUS7
918	0.0416857	0.379233	1.12591	0.64683	1.74066	IMAGE:2449395	AKR1C2
919	0.0417019	0.379233	1.16408	0.59417	1.95917	IMAGE:450616	PER3
920	0.0417399	0.379233	1.18007	0.679052	1.73782	IMAGE:726035	JUN
921	0.041741	0.379233	1.17281	0.853167	1.37466	IMAGE:282720	EXOSC8
922	0.0417489	0.379233	0.737159	1.1993	0.614657	IMAGE:135853
923	0.0418119	0.379233	1.13775	0.794574	1.4319	IMAGE:814319	In multiple ClusterIDs
924	0.0418156	0.379233	0.765327	1.33871	0.57169	IMAGE:1737724	SAP25
925	0.0418205	0.379233	1.40297	0.932227	1.50497	IMAGE:755145	EZR
926	0.041885	0.379233	1.27972	0.676156	1.89264	IMAGE:2407433	DPYSL3
927	0.0418886	0.379233	1.50854	0.831934	1.81329	IMAGE:364209	In multiple ClusterIDs
928	0.0419067	0.379233	1.29812	0.852195	1.52326	IMAGE:854570	TEAD2
929	0.0419314	0.379233	0.782671	1.21077	0.646424	IMAGE:712434
930	0.0421694	0.38093	0.794398	1.39107	0.571068	IMAGE:1566459
931	0.0422097	0.38093	1.42367	0.906113	1.57118	IMAGE:2562146	MAPK13
932	0.0423165	0.381259	1.21998	0.845895	1.44223	IMAGE:856519	ALDH3A2
933	0.0423369	0.381259	0.828242	1.32473	0.625216	IMAGE:118447
934	0.0424174	0.381575	1.19277	0.809093	1.47421	IMAGE:2542220
935	0.0427708	0.384021	1.34417	0.795381	1.68996	IMAGE:853908	VEPH1
936	0.0427807	0.384021	1.28377	0.613125	2.09381	IMAGE:192481	NRXN2
937	0.0428362	0.384109	1.22873	0.767893	1.60013	IMAGE:1636580	In multiple ClusterIDs
938	0.0429162	0.384416	1.12631	0.693757	1.62349	IMAGE:1520357	IFIH1
939	0.0430549	0.384493	1.12662	0.753977	1.49424	IMAGE:194005	CLCC1
940	0.0430566	0.384493	1.2221	0.766381	1.59464	IMAGE:681917	IL1RAP
941	0.0430627	0.384493	0.716075	1.21442	0.589645	IMAGE:383089	PDE6G
942	0.0431418	0.384493	1.26823	0.769024	1.64915	IMAGE:797048	BMP4
943	0.0431536	0.384493	1.29269	0.600286	2.15345	IMAGE:506523	CDC42BPA
944	0.043282	0.385228	0.65015	1.43976	0.451567	IMAGE:283617	FNIP2
945	0.0436189	0.386521	1.13491	0.776441	1.46168	IMAGE:1588933
946	0.0436363	0.386521	0.874269	1.37964	0.633693	IMAGE:212467	Data not found
947	0.0436463	0.386521	1.14209	0.849641	1.3442	IMAGE:343072
948	0.0436772	0.386521	0.634819	1.21544	0.522294	IMAGE:1592006	HOXA10
949	0.0436862	0.386521	1.10529	0.45178	2.44653	IMAGE:712884	HMBOX1
950	0.0437033	0.386521	1.39921	0.912708	1.53304	IMAGE:1567734	DMPK
951	0.0437827	0.386576	1.13308	0.711674	1.59213	IMAGE:840836
952	0.0438333	0.386576	1.13352	0.794322	1.42703	IMAGE:234736	GATA6
953	0.0438475	0.386576	1.22021	0.790209	1.54416	IMAGE:741474	GPI
954	0.0439454	0.386868	0.653173	1.09777	0.595001	IMAGE:1912458	IL12A
955	0.0439727	0.386868	1.18323	0.646064	1.83144	IMAGE:1898625	TRPA1
956	0.0441319	0.387862	1.1329	0.72163	1.56991	IMAGE:842836	SERPINB1
957	0.0445604	0.391219	1.14498	0.763042	1.50055	IMAGE:825076	In multiple ClusterIDs
958	0.0446708	0.391779	0.751785	1.17866	0.63783	IMAGE:940399
959	0.0447296	0.391885	1.18671	0.659582	1.79918	IMAGE:1550909	GAGE12I
960	0.0450063	0.392673	0.70326	1.2054	0.583425	IMAGE:194906	Data not found
961	0.0450351	0.392673	0.89849	1.43945	0.624189	IMAGE:248129
962	0.0450623	0.392673	0.76914	1.31743	0.583819	IMAGE:1565452
963	0.0450921	0.392673	0.644932	1.24751	0.516975	IMAGE:593815
964	0.0451095	0.392673	1.27963	0.744775	1.71815	IMAGE:826194	SYTL2
965	0.0451383	0.392673	1.35102	0.850129	1.5892	IMAGE:626841	MET
966	0.0451642	0.392673	0.807596	1.52592	0.529253	IMAGE:452320
967	0.045203	0.392673	1.25591	0.823478	1.52513	IMAGE:740888	In multiple ClusterIDs
968	0.0452564	0.392673	1.29953	0.842668	1.54216	IMAGE:788232	SESN2
969	0.0453633	0.392673	1.08761	0.726072	1.49793	IMAGE:782851	C14orf135
970	0.0454478	0.392673	1.15188	0.738716	1.55931	IMAGE:491565	CITED2
971	0.0454678	0.392673	1.29414	0.890581	1.45314	IMAGE:435561	BYSL
972	0.0455562	0.392673	1.62048	0.818643	1.97947	IMAGE:84211	SOCS3
973	0.0455595	0.392673	0.848565	1.22912	0.690387	IMAGE:435082	ZFYVE27
974	0.0455969	0.392673	1.22445	0.782944	1.5639	IMAGE:325029	RICTOR
975	0.0456299	0.392673	1.1618	0.668383	1.73823	IMAGE:2308409	SULF1
976	0.0457688	0.392673	0.641169	1.41103	0.454399	IMAGE:767041
977	0.0457743	0.392673	1.8044	0.804665	2.24242	IMAGE:2488265	SEMA3F
978	0.0457763	0.392673	1.2745	0.801557	1.59003	IMAGE:744439	LOC348761
979	0.0457856	0.392673	1.8631	0.926765	2.01033	IMAGE:244058	CDCA7
980	0.045842	0.392673	0.773869	1.39004	0.556724	IMAGE:291478	RUNX3
981	0.0458625	0.392673	1.18165	0.679914	1.73794	IMAGE:1614000	Data not found
982	0.0459899	0.392673	1.28657	0.783284	1.64254	IMAGE:563673	ALDH7A1
983	0.0460133	0.392673	1.2559	0.867843	1.44715	IMAGE:980356	In multiple ClusterIDs
984	0.0460944	0.392673	1.05135	0.721429	1.45731	IMAGE:449039	Data not found
985	0.0461784	0.392673	1.12725	0.589393	1.91257	IMAGE:1323233	CYP24A1
986	0.0462041	0.392673	1.18328	0.731117	1.61846	IMAGE:68259	UPF2
987	0.0462097	0.392673	1.21816	0.828699	1.46997	IMAGE:287775	DUSP1
988	0.0463382	0.392673	1.1465	0.728026	1.5748	IMAGE:454672	ANK3
989	0.0463389	0.392673	0.690523	1.16299	0.593747	IMAGE:160	Data not found
990	0.046364	0.392673	1.09479	0.634015	1.72676	IMAGE:626874	FNDC3B
991	0.0463881	0.392673	1.39177	0.77347	1.79938	IMAGE:430297	ETV4
992	0.0464111	0.392673	1.62547	0.675316	2.40698	IMAGE:46173	SPON1
993	0.046446	0.392673	1.21895	0.752917	1.61897	IMAGE:825295	LDLR
994	0.0464981	0.392673	1.27806	0.680509	1.87809	IMAGE:565083	RGS16
995	0.0465238	0.392673	1.21094	0.621422	1.94866	IMAGE:767313	NR2F2
996	0.0465746	0.392673	1.15623	0.668867	1.72864	IMAGE:1893136
997	0.0465954	0.392673	1.0555	0.564943	1.86832	IMAGE:269806	KIT
998	0.0467601	0.393666	1.18605	0.754989	1.57095	IMAGE:431796	PPIL1
999	0.0469651	0.394996	0.807658	1.58417	0.50983	IMAGE:868396	GLIPR2
1000	0.047028	0.395129	1.16196	0.771061	1.50696	IMAGE:300137	PRKAB2
1001	0.0471224	0.395277	1.12282	0.801696	1.40055	IMAGE:745188	DDX3X
1002	0.0471397	0.395277	0.634803	1.22268	0.519189	IMAGE:2542486	FLT3
1003	0.0472506	0.395488	1.21363	0.757956	1.60119	IMAGE:743341	C21orf91
1004	0.047274	0.395488	1.19158	0.80102	1.48758	IMAGE:309288	RFC4
1005	0.0473369	0.395488	1.284	0.770597	1.66624	IMAGE:739155	CDH6
1006	0.0474185	0.395488	1.57077	0.957187	1.64102	IMAGE:148810	MDFIC
1007	0.0474252	0.395488	0.85883	1.31788	0.651674	IMAGE:704404	ZNF638
1008	0.0474697	0.395488	0.837945	1.52193	0.550579	IMAGE:1048723
1009	0.0475685	0.395488	0.703585	1.14343	0.615331	IMAGE:462632	CHKA
1010	0.0475759	0.395488	0.888004	1.4064	0.631404	IMAGE:212563	Data not found
1011	0.0475885	0.395488	1.28375	0.786067	1.63313	IMAGE:79848	NEDD9
1012	0.0476478	0.39559	1.48473	0.775512	1.91452	IMAGE:1896676	BRI3BP
1013	0.0477211	0.395793	1.08268	0.706595	1.53224	IMAGE:140337	PAPPA
1014	0.0478721	0.395793	1.23518	0.858329	1.43906	IMAGE:629896	MAP1B
1015	0.047894	0.395793	1.11803	0.614577	1.81918	IMAGE:1034644	NFE2L3
1016	0.0479035	0.395793	1.12857	0.789935	1.42869	IMAGE:203275	RFC4
1017	0.0479078	0.395793	0.874154	1.31134	0.66661	IMAGE:1424961
1018	0.0480375	0.396475	1.32389	0.582297	2.27357	IMAGE:470092	LARGE
1019	0.0480881	0.396503	0.870811	1.51167	0.57606	IMAGE:195576
1020	0.0482264	0.396684	0.911045	1.48464	0.613649	IMAGE:153694	SH3BP2
1021	0.0483115	0.396684	1.12801	0.770336	1.46431	IMAGE:743532	MPP6
1022	0.0483118	0.396684	1.23492	0.829091	1.48948	IMAGE:142331	LIN54
1023	0.0483221	0.396684	1.09766	0.772696	1.42056	IMAGE:417327	ARFGEF1
1024	0.0483462	0.396684	1.2546	0.76537	1.6392	IMAGE:453999	PJA1
1025	0.0484955	0.397295	1.22304	0.879872	1.39002	IMAGE:796114	SIRT1
1026	0.048538	0.397295	0.784172	1.39457	0.562302	IMAGE:814526	RBM38
1027	0.0485625	0.397295	1.24592	0.805898	1.546	IMAGE:241029	AURKB
1028	0.048654	0.397456	1.25541	0.814626	1.54109	IMAGE:969854	CALM3
1029	0.0486768	0.397456	1.64186	0.692697	2.37024	IMAGE:1870049	DDO
1030	0.0487574	0.397728	1.21756	0.607442	2.00441	IMAGE:37665	HEY1
1031	0.048912	0.398249	1.12145	0.775185	1.44669	IMAGE:813711	ADH5
1032	0.0489507	0.398249	1.61508	0.918109	1.75914	IMAGE:1909585	MTX3
1033	0.0489949	0.398249	1.29857	0.905294	1.43442	IMAGE:769019	RIPK1
1034	0.0490109	0.398249	1.84094	0.737346	2.49672	IMAGE:345601	PXDN
1035	0.0490914	0.398518	1.51109	0.767753	1.9682	IMAGE:263716	COL6A1
1036	0.0492497	0.39866	1.50607	0.800019	1.88254	IMAGE:1892526	RND3
1037	0.04927	0.39866	0.895168	1.52636	0.586472	IMAGE:460761	Data not found
1038	0.0493698	0.39866	1.18522	0.81447	1.4552	IMAGE:840766	TBL1X
1039	0.0494113	0.39866	1.36327	0.821415	1.65966	IMAGE:1541659
1040	0.0494154	0.39866	1.08922	0.782978	1.39112	IMAGE:124071	ASB9
1041	0.0494638	0.39866	0.869004	1.40234	0.61968	IMAGE:302180
1042	0.0494708	0.39866	1.19867	0.809524	1.48071	IMAGE:256664	H2AFX
1043	0.0495445	0.39866	1.15326	0.812802	1.41887	IMAGE:668685	IGFBP1
1044	0.0495453	0.39866	1.28789	0.870056	1.48024	IMAGE:489485	HYOU1
1045	0.0496038	0.39866	1.21856	0.842312	1.44669	IMAGE:588840	In multiple ClusterIDs
1046	0.0497086	0.39866	1.17386	0.724009	1.62133	IMAGE:338736	SERPINB1
1047	0.0497173	0.39866	1.20706	0.80539	1.49873	IMAGE:2267932	TTC33
1048	0.0497257	0.39866	0.719456	1.16746	0.616256	IMAGE:199578
1049	0.0498681	0.39942	1.18158	0.798716	1.47935	IMAGE:436070	CA14
1050	0.0499161	0.399424	1.26135	0.804378	1.5681	IMAGE:415962	In multiple ClusterIDs
1051	0.0499905	0.399489	0.75007	1.4813	0.506358	IMAGE:214441	In multiple ClusterIDs
