# Supplementary material for: PRAME-Induced Inhibition of Retinoic Acid Receptor Signaling-Mediated Differentiation—A Possible Target for ATRA Response in AML without t(15;17)
Source: Oxford University Press journal article supplement (doi:10.1158/1078-0432.ccr-11-2524), 2013-02-26
Supplement: 10780432ccr112524-sup-tab6.xlsx [file 10780432ccr112524-sup-tab6.xlsx]

## Sheet: Tabelle1
Supplementary Table 6
	Gene Set Name [# Genes (K)]	Description	# Genes in Overlap (k)	p value
C2	SENGUPTA_NASOPHARYNGEAL_CARCINOMA_WITH_LMP1_UP [399]	Genes up-regulated in nasopharyngeal carcinoma (NPC) positive for LMP1 [Gene ID=9260], a latent gene of Epstein-Barr virus (EBV).	31	6.33 e-15
	SENESE_HDAC3_TARGETS_UP [501]	Genes up-regulated in U2OS cells (osteosarcoma) upon knockdown of HDAC3 [Gene ID=8841] by RNAi.	32	5.07 e-13
	BASAKI_YBX1_TARGETS_DN [380]	Genes down-regulated in SKOC-3 cells (ovarian cancer) after YB-1 (YBX1) [Gene ID=4904] knockdown by RNAi.	27	3.17 e-12
	OSMAN_BLADDER_CANCER_UP [402]	Genes up-regulated in blood samples from bladder cancer patients.	26	6.56 e-11
	SENESE_HDAC1_TARGETS_UP [457]	Genes up-regulated in U2OS cells (osteosarcoma) upon knockdown of HDAC1 [Gene ID=3065] by RNAi.	27	2.12 e-10
	LEE_DIFFERENTIATING_T_LYMPHOCYTE [141]	Genes enriched at every T lymphocyte differentiation stage compared to the early passage fetal thymic stromal cultures (TSC).	15	1.01 e-9
	DIAZ_CHRONIC_MEYLOGENOUS_LEUKEMIA_UP [1398]	Genes up-regulated in CD34+ [Gene ID=947] cells isolated from bone marrow of CML (chronic myelogenous leukemia) patients, compared to those from normal donors.	49	1.15 e-9
	DACOSTA_UV_RESPONSE_VIA_ERCC3_DN [855]	Genes down-regulated in fibroblasts expressing mutant forms of ERCC3 [Gene ID=2071] after UV irradiation.	36	2.29 e-9
	RODRIGUES_THYROID_CARCINOMA_POORLY_DIFFERENTIATED_DN [796]	Genes down-regulated in poorly differentiated thyroid carcinoma (PDTC) compared to normal thyroid tissue.	34	4.63 e-9
	THUM_SYSTOLIC_HEART_FAILURE_UP [426]	Genes up-regulated in samples with systolic heart failure compared to normal hearts.	24	5.66 e-9
	Gene Set name [# Genes (K)]	Description	# Genes in Overlap (k)	p value
C3	ACAACTT,MIR-382 [64]	Targets of MicroRNA ACAACTT,MIR-382	7	1.71 e-3
	TACGGGT,MIR-99A,MIR-100,MIR-99B [21]	Targets of MicroRNA TACGGGT,MIR-99A,MIR-100,MIR-99B	4	2.24 e-3
	GCACCTT,MIR-18A,MIR-18B [91]	Targets of MicroRNA GCACCTT,MIR-18A,MIR-18B	8	3.33 e-3
	V$HMGIY_Q6 [187]	Genes with promoter regions [-2kb,2kb] around transcription start site containing the motif GGAAAWT which matches annotation for HMGA1: high mobility group AT-hook 1	12	5.16 e-3
	AAAGACA,MIR-511 [169]	Targets of MicroRNA AAAGACA,MIR-511	11	6.56 e-3
	V$STAT5A_02 [106]	Genes with promoter regions [-2kb,2kb] around transcription start site containing the motif TTCCNRGAANNNNNNTTCCNNGRR which matches annotation for STAT5A: signal transducer and activator of transcription 5A	8	8.33 e-3
	CCTGTGA,MIR-513 [108]	Targets of MicroRNA CCTGTGA,MIR-513	8	9.28 e-3
	ACTTTAT,MIR-142-5P [254]	Targets of MicroRNA ACTTTAT,MIR-142-5P	14	9.83 e-3
	CAGTATT,MIR-200B,MIR-200C,MIR-429 [393]	Targets of MicroRNA CAGTATT,MIR-200B,MIR-200C,MIR-429	19	1.13 e-2
	V$USF_Q6_01 [170]	Genes with promoter regions [-2kb,2kb] around transcription start site containing motif NRCCACGTGASN. Motif does not match any known transcription factor	10	1.8 e-2
	Gene Set name [# Genes (K)]	Description	# Genes in Overlap (k)	p value
C4	GNF2_BNIP2 [31]	Neighborhood of BNIP2	5	2.79 e-3
	module_15 [350]	Genes in module_15	20	8.69 e-3
	GCM_ERBB2IP [58]	Neighborhood of ERBB2IP	6	1.03 e-2
	module_539 [16]	Genes in module_539	3	1.34 e-2
	module_312 [45]	Genes in module_312	5	1.39 e-2
	module_352 [17]	Genes in module_352	3	1.58 e-2
	module_414 [17]	Genes in module_414	3	1.58 e-2
	MORF_BAG5 [48]	Neighborhood of BAG5	5	1.81 e-2
	module_423 [7]	Genes in module_423	2	1.93 e-2
	GNF2_RAP1B [33]	Neighborhood of RAP1B	4	2.03 e-2
