# Supplementary material for: PRAME-Induced Inhibition of Retinoic Acid Receptor Signaling-Mediated Differentiation—A Possible Target for ATRA Response in AML without t(15;17)
Source: Oxford University Press journal article supplement (doi:10.1158/1078-0432.ccr-11-2524), 2013-02-26
Supplement: 10780432ccr112524-sup-tab7.xlsx [file 10780432ccr112524-sup-tab7.xlsx]

## Sheet: ClassComparison TxATRA new 05
Supplementary Table 7
	Parametric p-value	FDR	Geom mean of intensities in ATRA treated samples	Geom mean of intensities in chemotherapy only samples	Fold-change	Probe set	Gene symbol	Description
1	4e-07	0.0017272	3282.85	53.3046	61.5866	206424_at	CYP26A1	cytochrome P450, family 26, subfamily A, polypeptide 1
2	2.1e-06	0.0039726	416.761	166.15	2.50834	218950_at	ARAP3	ArfGAP with RhoGAP domain, ankyrin repeat and PH domain 3
3	3.6e-06	0.0039726	7943.67	3959.52	2.00622	206023_at	NMU	neuromedin U
4	4.2e-06	0.0039726	61.7074	21.3342	2.89242	1553494_at	TDH	L-threonine dehydrogenase
5	4.6e-06	0.0039726	334.143	44.0879	7.57901	225207_at	PDK4	pyruvate dehydrogenase kinase, isozyme 4
6	6.5e-06	0.0040096	521.949	81.7608	6.38386	214639_s_at	HOXA1	homeobox A1
7	6.5e-06	0.0040096	1518.06	846.486	1.79337	222209_s_at	TMEM135	transmembrane protein 135
8	7.9e-06	0.004264	1372.93	699.679	1.96222	201661_s_at	ACSL3	acyl-CoA synthetase long-chain family member 3
9	1.32e-05	0.0063331	435.421	136.197	3.197	228642_at	NA	NA
10	2.08e-05	0.0089814	4253.88	2440.4	1.74311	200832_s_at	SCD	stearoyl-CoA desaturase (delta-9-desaturase)
11	2.67e-05	0.010481	135.031	24.1312	5.59573	235521_at	HOXA3	homeobox A3
12	3.1e-05	0.0111548	197.563	106.466	1.85565	244353_s_at	SLC2A12	solute carrier family 2 (facilitated glucose transporter), member 12
13	3.66e-05	0.0113502	341.699	206.565	1.6542	208116_s_at	MAN1A1	mannosidase, alpha, class 1A, member 1
14	3.68e-05	0.0113502	55.5455	33.7869	1.644	232138_at	MBNL2	muscleblind-like 2 (Drosophila)
15	3.98e-05	0.0114571	102.733	56.2315	1.82697	213281_at	JUN	jun oncogene
16	4.58e-05	0.0121813	1327.52	861.115	1.54163	228904_at	HOXB3	homeobox B3
17	4.94e-05	0.0121813	498.114	168.469	2.95671	238032_at	NA	NA
18	5.27e-05	0.0121813	421.701	240.364	1.75443	202308_at	SREBF1	sterol regulatory element binding transcription factor 1
19	5.36e-05	0.0121813	98.1492	57.6599	1.70221	203887_s_at	THBD	thrombomodulin
20	7.09e-05	0.0153073	237.145	90.1946	2.62926	1557051_s_at	NA	NA
21	7.75e-05	0.0159355	155.829	83.6171	1.8636	227620_at	SLC44A1	solute carrier family 44, member 1
22	8.77e-05	0.0171781	315.421	148.965	2.11743	227396_at	PTPRJ	protein tyrosine phosphatase, receptor type, J
23	9.15e-05	0.0171781	2928.08	1806.27	1.62106	224569_s_at	IRF2BP2	interferon regulatory factor 2 binding protein 2
24	0.0001006	0.0180996	368.191	178.361	2.0643	201466_s_at	JUN	jun oncogene
25	0.0001055	0.018222	697.802	296.221	2.35568	202481_at	DHRS3	dehydrogenase/reductase (SDR family) member 3
26	0.0001414	0.0228854	2995.86	1488.56	2.01259	201662_s_at	ACSL3	acyl-CoA synthetase long-chain family member 3
27	0.0001431	0.0228854	77.1441	139.357	0.553571	213797_at	RSAD2	radical S-adenosyl methionine domain containing 2
28	0.0001519	0.0234252	280.152	100.361	2.79144	201860_s_at	PLAT	plasminogen activator, tissue
29	0.0001898	0.0282606	60.5732	34.1133	1.77565	202342_s_at	TRIM2	tripartite motif-containing 2
30	0.0002064	0.0295992	524.633	1137.39	0.461259	39248_at	AQP3	aquaporin 3 (Gill blood group)
31	0.0002125	0.0295992	44.0009	86.4702	0.508856	205051_s_at	KIT	v-kit Hardy-Zuckerman 4 feline sarcoma viral oncogene homolog
32	0.0002301	0.0310491	174.299	89.3137	1.95154	222662_at	PPP1R3B	protein phosphatase 1, regulatory (inhibitor) subunit 3B
33	0.0002415	0.0315999	22.1843	13.1623	1.68545	226302_at	ATP8B1	ATPase, class I, type 8B, member 1
34	0.0003028	0.0384556	341.486	227.076	1.50384	207275_s_at	ACSL1	acyl-CoA synthetase long-chain family member 1
35	0.0003342	0.0412307	1209.94	782.984	1.5453	201963_at	ACSL1	acyl-CoA synthetase long-chain family member 1
36	0.0003537	0.0424244	714.231	400.871	1.7817	224596_at	SLC44A1	solute carrier family 44, member 1
37	0.0003674	0.0428766	55.5427	27.9242	1.98905	213056_at	FRMD4B	FERM domain containing 4B
38	0.0003791	0.0430777	367.557	234.795	1.56544	207813_s_at	FDXR	ferredoxin reductase
39	0.0004226	0.0467894	858.22	558.21	1.53745	210980_s_at	ASAH1	N-acylsphingosine amidohydrolase (acid ceramidase) 1
40	0.0004752	0.0512978	986.988	593.653	1.66257	226907_at	PPP1R14C	protein phosphatase 1, regulatory (inhibitor) subunit 14C
41	0.0005131	0.0540382	167.662	83.3191	2.01228	231852_at	ERI1	exoribonuclease 1
42	0.0006108	0.0627961	681.017	322.588	2.11111	226416_at	ERI1	exoribonuclease 1
43	0.0006455	0.0638377	28.2797	51.6692	0.547323	222919_at	TRDN	triadin
44	0.0006505	0.0638377	1290.88	845.544	1.52669	218885_s_at	GALNT12	UDP-N-acetyl-alpha-D-galactosamine:polypeptide N-acetylgalactosaminyltransferase 12 (GalNAc-T12)
45	0.0007246	0.0695294	2940.52	1759.9	1.67085	221760_at	MAN1A1	mannosidase, alpha, class 1A, member 1
46	0.0007872	0.0723085	297.612	178.958	1.66302	212324_s_at	VPS13D	vacuolar protein sorting 13 homolog D (S. cerevisiae)
47	0.0007988	0.0723085	450.525	216.306	2.08281	223839_s_at	SCD	stearoyl-CoA desaturase (delta-9-desaturase)
48	0.0008038	0.0723085	223.253	360.62	0.619083	209772_s_at	CD24	CD24 molecule
49	0.000847	0.0746397	781.208	517.644	1.50916	213572_s_at	SERPINB1	serpin peptidase inhibitor, clade B (ovalbumin), member 1
50	0.000882	0.0758275	797.44	389.008	2.04993	201660_at	ACSL3	acyl-CoA synthetase long-chain family member 3
51	0.0008956	0.0758275	1809.48	1179.87	1.53363	213702_x_at	ASAH1	N-acylsphingosine amidohydrolase (acid ceramidase) 1
52	0.0009814	0.0814939	126.279	47.2537	2.67237	223710_at	CCL26	chemokine (C-C motif) ligand 26
53	0.0010187	0.0829952	4437.13	2922.77	1.51812	228381_at	ATF7IP2	activating transcription factor 7 interacting protein 2
54	0.0010738	0.0858642	70.1762	147.865	0.474597	242625_at	RSAD2	radical S-adenosyl methionine domain containing 2
55	0.0011534	0.0898364	1832.06	1089.88	1.68097	1555037_a_at	IDH1	isocitrate dehydrogenase 1 (NADP+), soluble
56	0.001198	0.0898364	64.6122	35.8008	1.80477	242110_at	NA	NA
57	0.0012176	0.0898364	882.085	1400.47	0.629851	207459_x_at	GYPB	glycophorin B (MNS blood group)
58	0.0012204	0.0898364	1010.72	1677.29	0.60259	214407_x_at	GYPB	glycophorin B (MNS blood group)
59	0.0012275	0.0898364	208.799	140.698	1.48402	225912_at	TP53INP1	tumor protein p53 inducible nuclear protein 1
60	0.0013694	0.0982451	76.6582	49.387	1.55219	242868_at	NA	NA
61	0.0013879	0.0982451	201.461	69.6649	2.89186	230520_at	AIG1	androgen-induced 1
62	0.0016835	0.115557	73.419	128.633	0.570763	231049_at	LMO2	LIM domain only 2 (rhombotin-like 1)
63	0.0016982	0.115557	69.7862	36.0902	1.93366	242726_at	NA	NA
64	0.0017305	0.115557	121.477	74.9229	1.62135	227462_at	ERAP2	endoplasmic reticulum aminopeptidase 2
65	0.001752	0.115557	1243.23	785.588	1.58255	224318_s_at	KIAA1310	KIAA1310
66	0.0017716	0.115557	570.728	328.586	1.73692	224570_s_at	IRF2BP2	interferon regulatory factor 2 binding protein 2
67	0.0018138	0.115557	455.3	803.015	0.566988	206655_s_at	GP1BB	glycoprotein Ib (platelet), beta polypeptide
68	0.0018198	0.115557	120.296	79.2443	1.51804	212658_at	LHFPL2	lipoma HMGIC fusion partner-like 2
69	0.0018919	0.118395	26.0985	69.6393	0.374766	240304_s_at	TMC5	transmembrane channel-like 5
70	0.0019214	0.118523	2658.26	1596.71	1.66484	201193_at	IDH1	isocitrate dehydrogenase 1 (NADP+), soluble
71	0.0019963	0.118867	20.5592	9.52753	2.15787	228128_x_at	PAPPA	pregnancy-associated plasma protein A, pappalysin 1
72	0.0020045	0.118867	50.9529	24.4413	2.08471	235050_at	SLC2A12	solute carrier family 2 (facilitated glucose transporter), member 12
73	0.0020734	0.118867	26.3313	19.0069	1.38536	242248_at	PHKB	phosphorylase kinase, beta
74	0.0020786	0.118867	181.55	100.63	1.80414	218035_s_at	RBM47	RNA binding motif protein 47
75	0.0021121	0.118867	166.401	80.1947	2.07497	219889_at	FRAT1	frequently rearranged in advanced T-cell lymphomas
76	0.0021131	0.118867	479.493	304.484	1.57477	224595_at	SLC44A1	solute carrier family 44, member 1
77	0.0021243	0.118867	355.119	51.0253	6.95966	203505_at	ABCA1	ATP-binding cassette, sub-family A (ABC1), member 1
78	0.0021472	0.118867	621.341	302.025	2.05725	212636_at	QKI	quaking homolog, KH domain RNA binding (mouse)
79	0.0022185	0.121259	192.611	29.5442	6.51942	203504_s_at	ABCA1	ATP-binding cassette, sub-family A (ABC1), member 1
80	0.0022474	0.121303	177.173	106.456	1.66428	230708_at	PRICKLE1	prickle homolog 1 (Drosophila)
81	0.0024637	0.12979	934.357	493.249	1.89429	239294_at	NA	NA
82	0.0024733	0.12979	277.947	175.901	1.58014	227792_at	ITPRIPL2	inositol 1,4,5-triphosphate receptor interacting protein-like 2
83	0.0024948	0.12979	715.131	487.127	1.46806	234974_at	GALM	galactose mutarotase (aldose 1-epimerase)
84	0.0026622	0.13685	60.2407	26.4673	2.27604	209990_s_at	GABBR2	gamma-aminobutyric acid (GABA) B receptor, 2
85	0.0027521	0.139807	731.561	322.285	2.26992	201998_at	ST6GAL1	ST6 beta-galactosamide alpha-2,6-sialyltranferase 1
86	0.0030909	0.155192	263.329	100.629	2.61683	205896_at	SLC22A4	solute carrier family 22 (organic cation/ergothioneine transporter), member 4
87	0.0032813	0.161532	280.424	190.317	1.47346	239047_at	FAM122C	family with sequence similarity 122C
88	0.0033332	0.161532	649.424	295.775	2.19567	224571_at	IRF2BP2	interferon regulatory factor 2 binding protein 2
89	0.003366	0.161532	58.813	40.338	1.45801	242144_at	NA	NA
90	0.0033668	0.161532	25.4022	15.1491	1.67681	224940_s_at	PAPPA	pregnancy-associated plasma protein A, pappalysin 1
91	0.0034672	0.16452	1178.38	2087.57	0.564476	210254_at	MS4A3	membrane-spanning 4-domains, subfamily A, member 3 (hematopoietic cell-specific)
92	0.0035571	0.166952	193.614	125.643	1.54098	231944_at	GPR137B	G protein-coupled receptor 137B
93	0.0040525	0.188158	949.268	451.754	2.10129	202241_at	TRIB1	tribbles homolog 1 (Drosophila)
94	0.004116	0.189073	213.432	120.987	1.76408	204401_at	KCNN4	potassium intermediate/small conductance calcium-activated channel, subfamily N, member 4
95	0.0042606	0.193064	81.8632	53.3805	1.53358	244511_at	NA	NA
96	0.0042923	0.193064	108.176	65.8466	1.64285	206369_s_at	PIK3CG	phosphoinositide-3-kinase, catalytic, gamma polypeptide
97	0.0044217	0.196834	248.67	333.159	0.7464	205239_at	AREG	amphiregulin
98	0.0049353	0.217455	175.206	121.675	1.43994	223599_at	TRIM6	tripartite motif-containing 6
99	0.0050645	0.219509	249.842	137.134	1.82188	1557141_at	AQP1	aquaporin 1 (Colton blood group)
100	0.0051412	0.219509	230.587	149.25	1.54497	214235_at	CYP3A5P2	cytochrome P450, family 3, subfamily A, polypeptide 5 pseudogene 2
101	0.0051748	0.219509	25.1261	14.069	1.78592	243158_at	NA	NA
102	0.0052105	0.219509	67.3456	40.4493	1.66494	1559391_s_at	NA	NA
103	0.0052361	0.219509	103.37	51.5733	2.00434	235182_at	ISM1	isthmin 1 homolog (zebrafish)
104	0.005513	0.228896	21.8189	16.5388	1.31925	233405_at	NA	NA
105	0.0057401	0.236055	127.42	88.4813	1.44008	228149_at	C7orf60	chromosome 7 open reading frame 60
106	0.0058433	0.23733	768.478	517.089	1.48616	222423_at	NDFIP1	Nedd4 family interacting protein 1
107	0.0058901	0.23733	321.267	228.719	1.40464	213388_at	PDE4DIP	phosphodiesterase 4D interacting protein
108	0.005936	0.23733	40.9795	33.3653	1.22821	1564378_a_at	NA	NA
109	0.0061479	0.243547	1570.18	1041.65	1.5074	201464_x_at	JUN	jun oncogene
110	0.006299	0.247264	155.324	241.58	0.642951	207980_s_at	CITED2	Cbp/p300-interacting transactivator, with Glu/Asp-rich carboxy-terminal domain, 2
111	0.0067115	0.258933	41.6722	22.0338	1.89129	241534_at	NA	NA
112	0.0067162	0.258933	39.4533	23.1078	1.70736	210656_at	EED	embryonic ectoderm development
113	0.0068626	0.261811	670.572	468.02	1.43279	244758_at	SCAND3	SCAN domain containing 3
114	0.0069121	0.261811	231.95	114.112	2.03264	236168_at	NA	NA
115	0.0070209	0.26362	79.8775	63.3292	1.26131	217921_at	MAN1A2	mannosidase, alpha, class 1A, member 2
116	0.0071984	0.267954	33.0818	18.5111	1.78713	239262_at	NA	NA
117	0.0076178	0.281142	1115.9	2090.57	0.533777	206670_s_at	GAD1	glutamate decarboxylase 1 (brain, 67kDa)
118	0.0078081	0.284319	14.1633	9.86185	1.43617	231495_at	NA	NA
119	0.0079874	0.284319	146.216	116.041	1.26003	243046_at	NA	NA
120	0.0079986	0.284319	111.125	66.9264	1.66041	227446_s_at	C14orf167	chromosome 14 open reading frame 167
121	0.0080042	0.284319	117.009	219.088	0.534074	208937_s_at	ID1	inhibitor of DNA binding 1, dominant negative helix-loop-helix protein
122	0.0080331	0.284319	87.9893	48.4267	1.81696	230141_at	ARID4A	AT rich interactive domain 4A (RBP1-like)
123	0.0085536	0.298269	198.033	128.867	1.53673	226441_at	NA	NA
124	0.0087744	0.298269	91.8119	62.837	1.46111	227020_at	YPEL2	yippee-like 2 (Drosophila)
125	0.0089566	0.298269	44.2652	29.8865	1.48111	233246_at	NA	NA
126	0.0089971	0.298269	89.1352	60.3527	1.47691	235292_at	FLJ32255	hypothetical protein LOC643977
127	0.0091077	0.298269	15.0912	8.96833	1.68272	1557050_at	NA	NA
128	0.0091711	0.298269	224.355	122.857	1.82614	217936_at	ARHGAP5	Rho GTPase activating protein 5
129	0.0091752	0.298269	89.5698	59.5725	1.50354	219688_at	BBS7	Bardet-Biedl syndrome 7
130	0.0091849	0.298269	448.509	254.711	1.76086	231899_at	ZC3H12C	zinc finger CCCH-type containing 12C
131	0.0092389	0.298269	753.345	444.903	1.69328	222685_at	FAM29A	family with sequence similarity 29, member A
132	0.0092807	0.298269	133.277	80.9941	1.64552	227040_at	NHLRC3	NHL repeat containing 3
133	0.0092864	0.298269	51.1492	36.5599	1.39905	1569181_x_at	NA	NA
134	0.0093044	0.298269	589.003	327.493	1.79852	209921_at	SLC7A11	solute carrier family 7, (cationic amino acid transporter, y+ system) member 11
135	0.0093296	0.298269	289.186	183.759	1.57373	212323_s_at	VPS13D	vacuolar protein sorting 13 homolog D (S. cerevisiae)
136	0.0093943	0.298269	197.59	136.135	1.45143	224996_at	ASPH	aspartate beta-hydroxylase
137	0.0098457	0.309507	282.316	188.357	1.49883	204820_s_at	BTN3A3	butyrophilin, subfamily 3, member A3
138	0.0099588	0.309507	250.802	146.995	1.70619	226274_at	CLCN5	chloride channel 5
139	0.0099633	0.309507	1767.16	1277.84	1.38292	203903_s_at	HEPH	hephaestin
140	0.0104599	0.322613	306.276	728.631	0.420344	207854_at	GYPE	glycophorin E
141	0.0107415	0.328949	1083.99	464.21	2.33513	239552_at	VWDE	von Willebrand factor D and EGF domains
142	0.011311	0.342514	69.2589	35.081	1.97426	243009_at	LOC441242	hypothetical LOC441242
143	0.0113431	0.342514	71.4435	41.1691	1.73537	202770_s_at	CCNG2	cyclin G2
144	0.0116695	0.349463	88.9379	52.3658	1.6984	232773_at	NA	NA
145	0.0117351	0.349463	244.783	142.951	1.71235	233849_s_at	ARHGAP5	Rho GTPase activating protein 5
146	0.0118659	0.350351	507.005	1001.08	0.506458	209795_at	CD69	CD69 molecule
147	0.0119272	0.350351	191.794	78.4224	2.44565	222717_at	SDPR	serum deprivation response (phosphatidylserine binding protein)
148	0.0120536	0.351672	504.076	288.835	1.7452	209864_at	FRAT2	frequently rearranged in advanced T-cell lymphomas 2
149	0.0123241	0.35319	365.951	194.427	1.8822	223136_at	AIG1	androgen-induced 1
150	0.0123583	0.35319	71.1847	44.1338	1.61293	222313_at	NA	NA
151	0.0123957	0.35319	62.479	81.897	0.762897	1554887_at	NA	NA
152	0.0124986	0.35319	47.1673	31.8585	1.48052	242480_at	NA	NA
153	0.0125287	0.35319	163.104	103.999	1.56833	228006_at	NA	NA
154	0.0125964	0.35319	24.6395	16.9181	1.4564	230276_at	FAM49A	family with sequence similarity 49, member A
155	0.012697	0.353714	647.666	1275.52	0.507767	227404_s_at	EGR1	early growth response 1
156	0.0129297	0.357888	721.229	377.748	1.90929	203216_s_at	MYO6	myosin VI
157	0.0130364	0.358542	591.255	328.332	1.80078	226853_at	BMP2K	BMP2 inducible kinase
158	0.0134719	0.366174	108.155	62.4283	1.73247	233899_x_at	ZBTB10	zinc finger and BTB domain containing 10
159	0.0136036	0.366174	438.311	248.027	1.76719	219870_at	ATF7IP2	activating transcription factor 7 interacting protein 2
160	0.013782	0.366174	133.503	70.8669	1.88386	225008_at	ASPH	aspartate beta-hydroxylase
161	0.0137949	0.366174	253.567	213.157	1.18958	225283_at	ARRDC4	arrestin domain containing 4
162	0.0138215	0.366174	511.407	354.876	1.44109	212350_at	TBC1D1	TBC1 (tre-2/USP6, BUB2, cdc16) domain family, member 1
163	0.0138919	0.366174	1375.58	959.14	1.43418	219862_s_at	NARF	nuclear prelamin A recognition factor
164	0.0139075	0.366174	70.8466	41.1159	1.7231	238902_at	PCMTD1	protein-L-isoaspartate (D-aspartate) O-methyltransferase domain containing 1
165	0.0142036	0.368688	517.295	315.803	1.63803	226885_at	NA	NA
166	0.0143695	0.368688	71.1404	33.2548	2.13925	209047_at	AQP1	aquaporin 1 (Colton blood group)
167	0.0144851	0.368688	58.5706	31.8027	1.84169	232628_at	NA	NA
168	0.0149416	0.368688	236.628	130.945	1.80709	226069_at	PRICKLE1	prickle homolog 1 (Drosophila)
169	0.0150074	0.368688	96.3487	187.714	0.513274	201565_s_at	ID2	inhibitor of DNA binding 2, dominant negative helix-loop-helix protein
170	0.0152499	0.368688	64.7603	38.4288	1.6852	236154_at	QKI	quaking homolog, KH domain RNA binding (mouse)
171	0.0154126	0.368688	160.635	60.4537	2.65716	224694_at	ANTXR1	anthrax toxin receptor 1
172	0.0159973	0.368688	52.0135	42.7299	1.21726	215648_at	NA	NA
173	0.0167347	0.368688	29.923	19.9722	1.49823	237968_at	ATL2	atlastin GTPase 2
174	0.0167542	0.368688	260.104	144.602	1.79875	236104_at	HNRPLL	heterogeneous nuclear ribonucleoprotein L-like
175	0.016898	0.368688	1011.36	682.045	1.48284	204548_at	STAR	steroidogenic acute regulatory protein
176	0.0171042	0.368688	129.557	88.3238	1.46684	217482_at	NA	NA
177	0.017126	0.368688	21.5209	17.5645	1.22525	240957_at	NA	NA
178	0.0171419	0.368688	267.083	180.136	1.48268	201302_at	ANXA4	annexin A4
179	0.017263	0.368688	202.381	119.844	1.68871	242277_at	NA	NA
180	0.0174981	0.368688	1197.59	2098.24	0.570758	205837_s_at	GYPA	glycophorin A (MNS blood group)
181	0.0177168	0.368688	1237.43	727.671	1.70053	217800_s_at	NDFIP1	Nedd4 family interacting protein 1
182	0.0177191	0.368688	494.059	319.123	1.54818	202739_s_at	PHKB	phosphorylase kinase, beta
183	0.0181041	0.368688	144.418	99.2325	1.45535	235613_at	NA	NA
184	0.0181912	0.368688	70.4666	55.5872	1.26768	236437_at	NA	NA
185	0.0182488	0.368688	199.602	117.531	1.6983	205074_at	SLC22A5	solute carrier family 22 (organic cation/carnitine transporter), member 5
186	0.0183699	0.368688	16.8804	9.75898	1.72973	233799_at	NA	NA
187	0.0185169	0.368688	131.815	77.5445	1.69987	226641_at	NA	NA
188	0.0185694	0.368688	338.126	167.13	2.02313	225060_at	LRP11	low density lipoprotein receptor-related protein 11
189	0.0187398	0.368688	81.8276	47.3296	1.72889	235959_at	NA	NA
190	0.0188848	0.368688	303.809	178.932	1.69791	200854_at	NCOR1	nuclear receptor co-repressor 1
191	0.019239	0.368688	152.218	81.3395	1.87139	210896_s_at	ASPH	aspartate beta-hydroxylase
192	0.0193749	0.368688	30.9683	21.5256	1.43867	1565889_at	NA	NA
193	0.0195908	0.368688	237.745	131.579	1.80686	228667_at	AGPAT4	1-acylglycerol-3-phosphate O-acyltransferase 4 (lysophosphatidic acid acyltransferase, delta)
194	0.0195984	0.368688	52.6105	34.8111	1.51131	237456_at	NA	NA
195	0.019637	0.368688	54.9776	31.2065	1.76173	212148_at	PBX1	pre-B-cell leukemia homeobox 1
196	0.0196952	0.368688	327.068	190.411	1.7177	219972_s_at	C14orf135	chromosome 14 open reading frame 135
197	0.0197126	0.368688	479.342	236.057	2.03062	225385_s_at	HNRPLL	heterogeneous nuclear ribonucleoprotein L-like
198	0.0197708	0.368688	568.181	366.029	1.55228	229951_x_at	NA	NA
199	0.0200542	0.368688	772.332	405.517	1.90456	218306_s_at	HERC1	hect (homologous to the E6-AP (UBE3A) carboxyl terminus) domain and RCC1 (CHC1)-like domain (RLD) 1
200	0.0203366	0.368688	73.0066	42.9475	1.6999	244362_at	NA	NA
201	0.0206462	0.368688	2341.26	3511.05	0.666826	201315_x_at	IFITM2	interferon induced transmembrane protein 2 (1-8D)
202	0.0208741	0.368688	349.223	283.278	1.23279	223494_at	MGEA5	meningioma expressed antigen 5 (hyaluronidase)
203	0.0210026	0.368688	224.083	136.413	1.64268	1557411_s_at	SLC25A43	solute carrier family 25, member 43
204	0.0211885	0.368688	161.412	94.1602	1.71422	235610_at	ALKBH8	alkB, alkylation repair homolog 8 (E. coli)
205	0.0212208	0.368688	75.7507	38.1644	1.98485	235195_at	FBXW2	F-box and WD repeat domain containing 2
206	0.0214174	0.368688	34.1318	23.8007	1.43407	232372_at	NA	NA
207	0.0214991	0.368688	45.8924	28.1894	1.628	216248_s_at	NR4A2	nuclear receptor subfamily 4, group A, member 2
208	0.0217502	0.368688	634.838	449.094	1.4136	212314_at	KIAA0746	KIAA0746 protein
209	0.0220155	0.368688	617.64	1040.35	0.593685	210563_x_at	CFLAR	CASP8 and FADD-like apoptosis regulator
210	0.0220582	0.368688	218.63	157.114	1.39154	235879_at	MBNL1	muscleblind-like (Drosophila)
211	0.0220622	0.368688	634.639	388.441	1.63381	225687_at	FAM83D	family with sequence similarity 83, member D
212	0.0222796	0.368688	464.679	710.82	0.653722	203729_at	EMP3	epithelial membrane protein 3
213	0.0223716	0.368688	107.774	68.3166	1.57756	242919_at	ZNF253	zinc finger protein 253
214	0.0226131	0.368688	76.8497	64.962	1.18299	1555303_at	NA	NA
215	0.0226751	0.368688	30.4368	24.4358	1.24558	1560031_at	FRMD4A	FERM domain containing 4A
216	0.02281	0.368688	156.774	71.1911	2.20215	202920_at	ANK2	ankyrin 2, neuronal
217	0.0229221	0.368688	111.684	78.035	1.4312	233674_at	NA	NA
218	0.0231012	0.368688	119.6	84.8292	1.40989	204672_s_at	ANKRD6	ankyrin repeat domain 6
219	0.02311	0.368688	97.0267	61.104	1.58789	AFFX-LysX-3_at	NA	NA
220	0.023247	0.368688	49.7775	27.5717	1.80539	1553834_at	COL29A1	collagen, type XXIX, alpha 1
221	0.023741	0.368688	131.106	105.161	1.24672	1566785_x_at	LOC728806	similar to Vesicle-fusing ATPase (Vesicular-fusion protein NSF) (N-ethylmaleimide sensitive fusion protein) (NEM-sensitive fusion protein)
222	0.023771	0.368688	109.33	64.9013	1.68456	1554479_a_at	CARD8	caspase recruitment domain family, member 8
223	0.0239455	0.368688	423.738	614.12	0.689992	1555728_a_at	MS4A4A	membrane-spanning 4-domains, subfamily A, member 4
224	0.0241698	0.368688	107.037	153.893	0.69553	212543_at	AIM1	absent in melanoma 1
225	0.02419	0.368688	70.3597	115.014	0.611747	208711_s_at	CCND1	cyclin D1
226	0.0243426	0.368688	696.76	407.555	1.70961	219546_at	BMP2K	BMP2 inducible kinase
227	0.0244192	0.368688	64.8341	41.394	1.56627	235299_at	NA	NA
228	0.0245902	0.368688	30.7222	21.5657	1.42459	237530_at	NA	NA
229	0.0247981	0.368688	263.748	183.776	1.43516	218953_s_at	PCYOX1L	prenylcysteine oxidase 1 like
230	0.0249266	0.368688	583.687	1002.1	0.582462	213338_at	TMEM158	transmembrane protein 158
231	0.0251502	0.368688	103.113	66.5676	1.549	209765_at	ADAM19	ADAM metallopeptidase domain 19 (meltrin beta)
232	0.0252	0.368688	238.416	145.479	1.63884	222558_at	RPRD1A	regulation of nuclear pre-mRNA domain containing 1A
233	0.025371	0.368688	90.1092	72.0026	1.25147	217196_s_at	CAMSAP1L1	calmodulin regulated spectrin-associated protein 1-like 1
234	0.025426	0.368688	386.727	225.14	1.71772	212820_at	DMXL2	Dmx-like 2
235	0.0254954	0.368688	71.6482	49.6451	1.44321	215109_at	NA	NA
236	0.0255615	0.368688	38.4098	29.0595	1.32176	227266_s_at	FYB	FYN binding protein (FYB-120/130)
237	0.0257145	0.368688	56.5447	34.5323	1.63745	203106_s_at	VPS41	vacuolar protein sorting 41 homolog (S. cerevisiae)
238	0.025747	0.368688	807.785	467.855	1.72657	203427_at	ASF1A	ASF1 anti-silencing function 1 homolog A (S. cerevisiae)
239	0.0258834	0.368688	286.773	246.613	1.16285	212063_at	CD44	CD44 molecule (Indian blood group)
240	0.0261142	0.368688	252.729	182.374	1.38578	205128_x_at	PTGS1	prostaglandin-endoperoxide synthase 1 (prostaglandin G/H synthase and cyclooxygenase)
241	0.0263065	0.368688	73.884	51.5758	1.43253	233438_at	C6orf162	chromosome 6 open reading frame 162
242	0.0264051	0.368688	236.346	462.208	0.511341	208502_s_at	PITX1	paired-like homeodomain 1
243	0.0264627	0.368688	96.4886	61.3377	1.57307	203961_at	NEBL	nebulette
244	0.026505	0.368688	26.6083	22.6815	1.17313	236307_at	NA	NA
245	0.0265574	0.368688	111.463	94.3172	1.18179	236755_at	NA	NA
246	0.0265824	0.368688	23.7631	55.7543	0.426211	1561136_at	GYPE	glycophorin E
247	0.0266237	0.368688	250.676	174.917	1.43312	234032_at	NA	NA
248	0.0267034	0.368688	520.607	375.929	1.38485	202880_s_at	CYTH1	cytohesin 1
249	0.0267063	0.368688	206.594	316.714	0.652305	223553_s_at	DOK3	docking protein 3
250	0.0269832	0.368688	141.53	70.7424	2.00064	229787_s_at	OGT	O-linked N-acetylglucosamine (GlcNAc) transferase (UDP-N-acetylglucosamine:polypeptide-N-acetylglucosaminyl transferase)
251	0.0270003	0.368688	149.56	45.1009	3.31612	204422_s_at	FGF2	fibroblast growth factor 2 (basic)
252	0.0272213	0.368688	59.5349	42.0568	1.41558	241186_at	NA	NA
253	0.0273289	0.368688	168.055	121.149	1.38717	214234_s_at	CYP3A5P2	cytochrome P450, family 3, subfamily A, polypeptide 5 pseudogene 2
254	0.0273811	0.368688	29.7063	23.5908	1.25924	236975_at	NA	NA
255	0.0274155	0.368688	594.281	391.528	1.51785	221485_at	B4GALT5	UDP-Gal:betaGlcNAc beta 1,4- galactosyltransferase, polypeptide 5
256	0.0274565	0.368688	84.6292	41.6612	2.03136	229455_at	NA	NA
257	0.0274919	0.368688	205.166	143.037	1.43436	235125_x_at	FAM73A	family with sequence similarity 73, member A
258	0.0276447	0.368688	75.6783	40.8382	1.85312	239847_at	NA	NA
259	0.0282236	0.368688	587.421	400.106	1.46816	201887_at	IL13RA1	interleukin 13 receptor, alpha 1
260	0.02865	0.368688	722.331	468.557	1.54161	59644_at	BMP2K	BMP2 inducible kinase
261	0.0286627	0.368688	978.513	617.666	1.58421	200899_s_at	MGEA5	meningioma expressed antigen 5 (hyaluronidase)
262	0.0288503	0.368688	105.156	48.1677	2.18312	223089_at	VEZT	vezatin, adherens junctions transmembrane protein
263	0.0289903	0.368688	344.915	189.898	1.81632	224492_s_at	ZNF627	zinc finger protein 627
264	0.0290254	0.368688	202.154	147.628	1.36935	229450_at	IFIT3	interferon-induced protein with tetratricopeptide repeats 3
265	0.0291498	0.368688	179.539	83.2596	2.15637	202843_at	DNAJB9	DnaJ (Hsp40) homolog, subfamily B, member 9
266	0.0292648	0.368688	161.249	110.978	1.45298	226272_at	RCAN3	RCAN family member 3
267	0.0292787	0.368688	346.634	255.003	1.35933	203460_s_at	PSEN1	presenilin 1
268	0.029287	0.368688	588.423	749.79	0.784784	219607_s_at	MS4A4A	membrane-spanning 4-domains, subfamily A, member 4
269	0.0294265	0.368688	187.348	242.683	0.771986	228433_at	NFYA	nuclear transcription factor Y, alpha
270	0.0296084	0.368688	177.964	120.799	1.47322	235138_at	NA	NA
271	0.0296243	0.368688	277.517	205.789	1.34855	209723_at	SERPINB9	serpin peptidase inhibitor, clade B (ovalbumin), member 9
272	0.0296588	0.368688	183.255	268.592	0.682282	204718_at	EPHB6	EPH receptor B6
273	0.0298325	0.368688	555.166	396.431	1.40041	202729_s_at	LTBP1	latent transforming growth factor beta binding protein 1
274	0.0300075	0.368688	89.6807	68.6044	1.30721	1557804_at	NA	NA
275	0.0300773	0.368688	248.459	123.245	2.01598	203543_s_at	KLF9	Kruppel-like factor 9
276	0.0305324	0.368688	176.263	128.942	1.36699	239757_at	ZFAND6	zinc finger, AN1-type domain 6
277	0.0305594	0.368688	272.526	190.594	1.42987	201940_at	CPD	carboxypeptidase D
278	0.0307311	0.368688	201.097	160.108	1.25601	242343_x_at	NA	NA
279	0.0308558	0.368688	63.4998	46.8889	1.35426	235008_at	NA	NA
280	0.031051	0.368688	19.7923	11.7037	1.69111	232038_at	C6orf170	chromosome 6 open reading frame 170
281	0.0310526	0.368688	85.5678	59.7048	1.43318	243303_at	NA	NA
282	0.0313536	0.368688	292.175	191.357	1.52686	227489_at	SMURF2	SMAD specific E3 ubiquitin protein ligase 2
283	0.0314783	0.368688	441.555	291.346	1.51557	218287_s_at	EIF2C1	eukaryotic translation initiation factor 2C, 1
284	0.03163	0.368688	284.733	166.222	1.71297	227491_at	ELOVL6	ELOVL family member 6, elongation of long chain fatty acids (FEN1/Elo2, SUR4/Elo3-like, yeast)
285	0.0317031	0.368688	197.37	169.099	1.16718	233595_at	USP34	ubiquitin specific peptidase 34
286	0.03173	0.368688	70.9158	40.0443	1.77093	216170_at	NA	NA
287	0.0321032	0.368688	946.561	677.707	1.39671	201724_s_at	GALNT1	UDP-N-acetyl-alpha-D-galactosamine:polypeptide N-acetylgalactosaminyltransferase 1 (GalNAc-T1)
288	0.0321892	0.368688	291.889	410.623	0.710845	201693_s_at	EGR1	early growth response 1
289	0.0322001	0.368688	23.4661	19.4928	1.20384	238833_at	LOC729088	hypothetical protein LOC729088
290	0.0322559	0.368688	31.3504	22.8658	1.37106	1558739_at	NA	NA
291	0.0325373	0.368688	183.744	106.548	1.72451	232297_at	NA	NA
292	0.0325732	0.368688	327.585	214.184	1.52945	242546_at	FLJ39632	hypothetical LOC642477
293	0.0326916	0.368688	190.974	159.888	1.19443	236472_at	NA	NA
294	0.0327111	0.368688	3227.69	2168.45	1.48847	209787_s_at	HMGN4	high mobility group nucleosomal binding domain 4
295	0.0327439	0.368688	829.414	1262.61	0.656907	213753_x_at	EIF5A	eukaryotic translation initiation factor 5A
296	0.0330785	0.368688	39.0731	23.6666	1.65099	1566518_at	NA	NA
297	0.0330826	0.368688	12.3124	9.01386	1.36594	234193_at	NA	NA
298	0.0331114	0.368688	1677.34	1124.78	1.49126	223044_at	SLC40A1	solute carrier family 40 (iron-regulated transporter), member 1
299	0.033239	0.368688	1109.61	1739.05	0.638056	201523_x_at	UBE2N	ubiquitin-conjugating enzyme E2N (UBC13 homolog, yeast)
300	0.0335278	0.368688	177.184	119.844	1.47845	1553957_at	ZNF564	zinc finger protein 564
301	0.0336105	0.368688	204.24	140.342	1.45531	214719_at	SLC46A3	solute carrier family 46, member 3
302	0.0339117	0.368688	85.605	52.374	1.63449	230387_at	NA	NA
303	0.0339206	0.368688	46.7005	34.8314	1.34076	215392_at	NA	NA
304	0.0339765	0.368688	107.593	75.3302	1.42829	208092_s_at	FAM49A	family with sequence similarity 49, member A
305	0.0340232	0.368688	96.504	76.8124	1.25636	235701_at	NA	NA
306	0.0341056	0.368688	28.9555	17.4486	1.65947	239140_at	NA	NA
307	0.0343629	0.368688	93.6709	194.669	0.48118	208501_at	GFI1B	growth factor independent 1B transcription repressor
308	0.0345743	0.368688	164.2	112.314	1.46198	218017_s_at	HGSNAT	heparan-alpha-glucosaminide N-acetyltransferase
309	0.0346515	0.368688	121.897	65.9573	1.84812	236067_at	NA	NA
310	0.0347538	0.368688	74.7411	46.6219	1.60313	242618_at	TRIM26	tripartite motif-containing 26
311	0.0348904	0.368688	34.6646	29.4421	1.17738	243315_at	NA	NA
312	0.0349555	0.368688	598.034	419.23	1.42651	242881_x_at	NA	NA
313	0.0349633	0.368688	233.024	165.694	1.40635	221864_at	ORAI3	ORAI calcium release-activated calcium modulator 3
314	0.0350236	0.368688	259.737	162.644	1.59697	229168_at	COL23A1	collagen, type XXIII, alpha 1
315	0.0350989	0.368688	338.682	213.138	1.58903	219481_at	TTC13	tetratricopeptide repeat domain 13
316	0.0351254	0.368688	206.069	114.32	1.80256	202512_s_at	ATG5	ATG5 autophagy related 5 homolog (S. cerevisiae)
317	0.0352425	0.368688	220.762	157.279	1.40364	213595_s_at	CDC42BPA	CDC42 binding protein kinase alpha (DMPK-like)
318	0.0353498	0.368688	142.649	79.7196	1.78938	242506_at	NA	NA
319	0.0361952	0.368688	180.038	94.6871	1.9014	202769_at	CCNG2	cyclin G2
320	0.0362454	0.368688	127.967	74.8633	1.70935	209943_at	FBXL4	F-box and leucine-rich repeat protein 4
321	0.0364597	0.368688	3114.85	2312.62	1.34689	201170_s_at	BHLHE40	basic helix-loop-helix family, member e40
322	0.0365791	0.368688	40.9924	34.9955	1.17136	1558759_s_at	CLASP2	cytoplasmic linker associated protein 2
323	0.0367123	0.368688	554.361	389.483	1.42332	228242_at	N4BP2	NEDD4 binding protein 2
324	0.0367293	0.368688	204.013	112.191	1.81845	230333_at	NA	NA
325	0.0369078	0.368688	62.657	33.9838	1.84373	218736_s_at	PALMD	palmdelphin
326	0.0371618	0.368688	499.678	279.269	1.78923	209102_s_at	HBP1	HMG-box transcription factor 1
327	0.037172	0.368688	154.557	108.751	1.4212	228063_s_at	NAP1L5	nucleosome assembly protein 1-like 5
328	0.0376627	0.368688	78.7347	47.9499	1.64202	1558624_at	NA	NA
329	0.037918	0.368688	188.35	110.832	1.69943	224797_at	ARRDC3	arrestin domain containing 3
330	0.0379525	0.368688	111.978	75.3145	1.4868	213304_at	FAM179B	family with sequence similarity 179, member B
331	0.0380736	0.368688	106.609	83.2549	1.28051	1556306_at	NA	NA
332	0.0383551	0.368688	245.21	374.052	0.655551	202283_at	SERPINF1	serpin peptidase inhibitor, clade F (alpha-2 antiplasmin, pigment epithelium derived factor), member 1
333	0.0384452	0.368688	272.635	161.594	1.68717	213331_s_at	NEK1	NIMA (never in mitosis gene a)-related kinase 1
334	0.0384754	0.368688	84.8093	66.2936	1.2793	213935_at	ABHD5	abhydrolase domain containing 5
335	0.0385116	0.368688	122.265	212.622	0.575036	210001_s_at	SOCS1	suppressor of cytokine signaling 1
336	0.0385319	0.368688	228.522	139.341	1.64002	226030_at	ACADSB	acyl-Coenzyme A dehydrogenase, short/branched chain
337	0.0385583	0.368688	33.8981	43.0907	0.786668	229809_at	POU6F1	POU class 6 homeobox 1
338	0.0387442	0.368688	242.484	157.478	1.5398	218087_s_at	SORBS1	sorbin and SH3 domain containing 1
339	0.038985	0.368688	269.195	162.244	1.6592	235456_at	NA	NA
340	0.0390905	0.368688	737.666	484.338	1.52304	214129_at	PDE4DIP	phosphodiesterase 4D interacting protein
341	0.0391036	0.368688	161.096	85.4108	1.88613	204497_at	ADCY9	adenylate cyclase 9
342	0.0392539	0.368688	482.703	264.82	1.82276	204873_at	PEX1	peroxisomal biogenesis factor 1
343	0.0395535	0.368688	14.6954	9.77298	1.50367	241379_at	APLF	aprataxin and PNKP like factor
344	0.0396782	0.368688	72.5826	45.0022	1.61287	209741_x_at	SCAPER	S phase cyclin A-associated protein in the ER
345	0.0398094	0.368688	101.456	59.5905	1.70255	235031_at	NA	NA
346	0.0398203	0.368688	443.684	281.965	1.57355	209135_at	ASPH	aspartate beta-hydroxylase
347	0.0399309	0.368688	103.156	68.0774	1.51527	238558_at	NA	NA
348	0.0401235	0.368688	20.2214	13.4481	1.50366	1560342_at	NA	NA
349	0.0401358	0.368688	175.745	110.832	1.58569	214823_at	ZNF204	zinc finger protein 204 pseudogene
350	0.0401611	0.368688	336.211	211.945	1.58631	203429_s_at	C1orf9	chromosome 1 open reading frame 9
351	0.0403043	0.368688	83.4543	43.7443	1.90777	236170_x_at	NA	NA
352	0.0403776	0.368688	189.641	121.025	1.56696	227471_at	HACE1	HECT domain and ankyrin repeat containing, E3 ubiquitin protein ligase 1
353	0.0408206	0.368688	188.217	118.378	1.58998	212448_at	NEDD4L	neural precursor cell expressed, developmentally down-regulated 4-like
354	0.0409856	0.368688	103.843	61.6702	1.68384	243166_at	SLC30A5	solute carrier family 30 (zinc transporter), member 5
355	0.0412672	0.368688	114.723	84.1431	1.36343	219230_at	TMEM100	transmembrane protein 100
356	0.0412805	0.368688	133.756	92.1338	1.45176	74694_s_at	RABEP2	rabaptin, RAB GTPase binding effector protein 2
357	0.0413125	0.368688	433.585	303.375	1.4292	228220_at	FCHO2	FCH domain only 2
358	0.0414055	0.368688	232.809	152.529	1.52633	218251_at	MID1IP1	MID1 interacting protein 1 (gastrulation specific G12 homolog (zebrafish))
359	0.0414708	0.368688	33.128	18.7334	1.76839	1557756_a_at	C14orf145	chromosome 14 open reading frame 145
360	0.0416799	0.368688	826.774	583.214	1.41762	201448_at	TIA1	TIA1 cytotoxic granule-associated RNA binding protein
361	0.0417698	0.368688	525.308	1619.46	0.324373	1554892_a_at	MS4A3	membrane-spanning 4-domains, subfamily A, member 3 (hematopoietic cell-specific)
362	0.0420895	0.368688	157.769	79.2477	1.99084	235078_at	NA	NA
363	0.0421099	0.368688	1042.64	2129.05	0.48972	211821_x_at	GYPA	glycophorin A (MNS blood group)
364	0.0421936	0.368688	465.934	258.392	1.80321	202842_s_at	DNAJB9	DnaJ (Hsp40) homolog, subfamily B, member 9
365	0.0424966	0.368688	36.0757	30.5233	1.1819	1556381_at	NARG1	NMDA receptor regulated 1
366	0.0425364	0.368688	46.1089	23.551	1.95784	204935_at	PTPN2	protein tyrosine phosphatase, non-receptor type 2
367	0.0426867	0.368688	754.507	1106.21	0.682063	209953_s_at	CDC37	cell division cycle 37 homolog (S. cerevisiae)
368	0.0428069	0.368688	128.259	78.1012	1.64222	53720_at	C19orf66	chromosome 19 open reading frame 66
369	0.0428983	0.368688	18.0498	34.9901	0.515856	1559520_at	GYPA	glycophorin A (MNS blood group)
370	0.0430265	0.368688	484.905	296.135	1.63744	225984_at	PRKAA1	protein kinase, AMP-activated, alpha 1 catalytic subunit
371	0.0432039	0.368688	179.86	119.784	1.50154	218319_at	PELI1	pellino homolog 1 (Drosophila)
372	0.0432526	0.368688	101.078	82.7213	1.22191	225509_at	SAP30L	SAP30-like
373	0.0433699	0.368688	359.676	240.958	1.4927	230875_s_at	ATP11A	ATPase, class VI, type 11A
374	0.0435562	0.368688	193.841	114.276	1.69625	243209_at	KCNQ4	potassium voltage-gated channel, KQT-like subfamily, member 4
375	0.0435646	0.368688	199.809	121.016	1.6511	225447_at	GPD2	glycerol-3-phosphate dehydrogenase 2 (mitochondrial)
376	0.0435718	0.368688	351.996	482.747	0.729151	216602_s_at	FARSA	phenylalanyl-tRNA synthetase, alpha subunit
377	0.0437222	0.368688	114.462	49.7345	2.30146	239102_s_at	NA	NA
378	0.0437382	0.368688	55.3422	33.4567	1.65414	204069_at	MEIS1	Meis homeobox 1
379	0.0437972	0.368688	2362.7	3923.14	0.602247	203725_at	GADD45A	growth arrest and DNA-damage-inducible, alpha
380	0.0438195	0.368688	193.135	119.038	1.62246	226974_at	NA	NA
381	0.0440263	0.368688	310.205	481.892	0.643723	201156_s_at	RAB5C	RAB5C, member RAS oncogene family
382	0.0443929	0.368688	116.373	72.7163	1.60037	1569974_x_at	2011-09-13	septin 13
383	0.0445665	0.368688	165.402	106.74	1.54957	230187_s_at	NA	NA
384	0.0447622	0.368688	540.703	906.414	0.59653	202671_s_at	PDXK	pyridoxal (pyridoxine, vitamin B6) kinase
385	0.0450159	0.368688	519.684	331.972	1.56545	203343_at	UGDH	UDP-glucose dehydrogenase
386	0.0450968	0.368688	204.818	269.415	0.760235	234973_at	SLC38A5	solute carrier family 38, member 5
387	0.0451468	0.368688	61.9636	53.3356	1.16177	244813_at	NA	NA
388	0.0451644	0.368688	285.477	170.429	1.67505	226444_at	NA	NA
389	0.0451713	0.368688	64.2958	29.6485	2.1686	1557765_at	LOC643401	hypothetical protein LOC643401
390	0.0452305	0.368688	109.093	54.8563	1.9887	235635_at	ARHGAP5	Rho GTPase activating protein 5
391	0.0452491	0.368688	965.346	1508.17	0.640078	218119_at	TIMM23	translocase of inner mitochondrial membrane 23 homolog (yeast)
392	0.0453388	0.368688	98.7917	58.1414	1.69916	231252_at	C2orf67	chromosome 2 open reading frame 67
393	0.0453796	0.368688	42.767	27.7721	1.53993	229712_at	SNAPC3	small nuclear RNA activating complex, polypeptide 3, 50kDa
394	0.0456454	0.368688	656.582	411.187	1.5968	218542_at	CEP55	centrosomal protein 55kDa
395	0.0458618	0.368688	459.166	332.556	1.38072	201449_at	TIA1	TIA1 cytotoxic granule-associated RNA binding protein
396	0.0461285	0.368688	168.519	121.058	1.39206	205765_at	CYP3A5	cytochrome P450, family 3, subfamily A, polypeptide 5
397	0.0462094	0.368688	59.1506	43.1462	1.37093	242310_at	NA	NA
398	0.0462549	0.368688	425.349	266.65	1.59516	229299_at	C5orf33	chromosome 5 open reading frame 33
399	0.0466022	0.368688	323.595	199.137	1.62498	224826_at	RP5-1022P6.2	hypothetical protein KIAA1434
400	0.0466213	0.368688	103.03	60.7795	1.69514	1556088_at	RPAIN	RPA interacting protein
401	0.0469226	0.368688	84.805	50.9507	1.66445	204944_at	PTPRG	protein tyrosine phosphatase, receptor type, G
402	0.0470871	0.368688	144.178	89.1848	1.61662	229796_at	SIX4	SIX homeobox 4
403	0.0474864	0.368688	51.3437	30.6182	1.6769	215591_at	SATB2	SATB homeobox 2
404	0.0476285	0.368688	37.373	24.3956	1.53196	215318_at	CG012	hypothetical gene CG012
405	0.0476543	0.368688	18.7263	15.0545	1.2439	236558_at	NA	NA
406	0.0476949	0.368688	147.442	83.0511	1.77532	210531_at	NR2C1	nuclear receptor subfamily 2, group C, member 1
407	0.0479045	0.368688	40.9957	28.1278	1.45748	1559156_at	NA	NA
408	0.0479308	0.368688	346.275	239.103	1.44822	233632_s_at	XRN1	5@#$%&-3@#$%& exoribonuclease 1
409	0.0480135	0.368688	487.943	729.608	0.668774	200001_at	CAPNS1	calpain, small subunit 1
410	0.0480328	0.368688	530.093	357.19	1.48406	204566_at	PPM1D	protein phosphatase 1D magnesium-dependent, delta isoform
411	0.0481507	0.368688	51.0481	35.0216	1.45762	221523_s_at	RRAGD	Ras-related GTP binding D
412	0.0483383	0.368688	135.3	77.5837	1.74392	235347_at	LRCH3	leucine-rich repeats and calponin homology (CH) domain containing 3
413	0.0484198	0.368688	52.1806	31.6053	1.65101	230302_at	NA	NA
414	0.0484911	0.368688	58.5648	49.1662	1.19116	222186_at	ZFAND6	zinc finger, AN1-type domain 6
415	0.0486206	0.368688	56.1962	33.0805	1.69877	229689_s_at	NA	NA
416	0.0486821	0.368688	96.1144	53.4072	1.79965	239010_at	FLJ39632	hypothetical LOC642477
417	0.0487925	0.368688	483.288	348.806	1.38555	201941_at	CPD	carboxypeptidase D
418	0.0488216	0.368688	185.149	74.1841	2.49581	240798_at	NA	NA
419	0.0491312	0.368688	222.56	124.16	1.79252	221773_at	ELK3	ELK3, ETS-domain protein (SRF accessory protein 2)
420	0.04914	0.368688	61.5567	39.907	1.5425	242699_at	NA	NA
421	0.0491932	0.368688	105.901	55.4619	1.90943	228105_at	NA	NA
422	0.0492497	0.368688	151.46	96.3243	1.57239	228486_at	SLC44A1	solute carrier family 44, member 1
423	0.0494617	0.368688	162.528	108.626	1.49622	219495_s_at	ZNF180	zinc finger protein 180
424	0.0496891	0.368688	148.534	93.0208	1.59679	217604_at	NA	NA
425	0.0497771	0.368688	71.9015	48.7311	1.47547	1559401_a_at	NA	NA
426	0.0498319	0.368688	49.9372	89.0932	0.560504	201109_s_at	THBS1	thrombospondin 1
427	0.0499596	0.368688	156.202	83.9108	1.86152	235919_at	NA	NA
